# Supplementary material for: Liver proteomic analysis reveals the key proteins involved in host immune response to sepsis
Source: PeerJ. 2023 May 26;11:e15294. doi: 10.7717/peerj.15294 (PMC10226476; doi:10.7717/peerj.15294)
Supplement: Supplemental Information 1 [file peerj-11-15294-s001.xlsx]

## Sheet: treatment vs. control
Table S1:The identified information of differentially expressed significant proteins by TMT
GeneName	Accession	Description	#.Unique.Peptides	Score	MEAN Treatment	MEAN Control	P-VALUE	Q-VALUE	FOLD CHANGE	LOG2 FOLD CHANGE
Aox1	F1LRQ1	Aldehyde oxidase 1 OS=Rattus norvegicus OX=10116 GN=Aox1 PE=1 SV=3	38	154.55	897.3	2860.73	0.0241974	0.0294248	0.313661	-1.67272
Cyp2c11	P08683	Cytochrome P450 2C11 OS=Rattus norvegicus OX=10116 GN=Cyp2c11 PE=1 SV=1	18	185.46	857.267	2772.73	0.00488871	0.0123262	0.309177	-1.69349
Aox3	Q5QE80	Aldehyde oxidase 3 OS=Rattus norvegicus OX=10116 GN=Aox3 PE=1 SV=1	35	136.99	541.367	2333.77	0.00572425	0.0133504	0.231971	-2.10798
Pck1	P07379	Phosphoenolpyruvate carboxykinase, cytosolic [GTP] OS=Rattus norvegicus OX=10116 GN=Pck1 PE=1 SV=1	27	143.03	2111.03	826.933	0.000215588	0.00370174	2.55285	1.35211
A2m	P06238	Alpha-2-macroglobulin OS=Rattus norvegicus OX=10116 GN=A2m PE=2 SV=2	18	105.95	1022.33	201.667	6.05418e-05	0.00248975	5.06942	2.34182
Selenbp1	F1LRJ9	Methanethiol oxidase OS=Rattus norvegicus OX=10116 GN=Selenbp1 PE=1 SV=2	26	123.22	888.467	1885.33	0.0319083	0.0348465	0.471252	-1.08543
Rnf213	F1M0R1	Ring finger protein 213 OS=Rattus norvegicus OX=10116 GN=Rnf213 PE=1 SV=3	47	96.85	1770.07	880.133	0.00126038	0.00646547	2.01113	1.00801
Mug2	Q6IE52	Murinoglobulin-2 OS=Rattus norvegicus OX=10116 GN=Mug2 PE=1 SV=1	2	102.12	91.7333	194.233	0.000755833	0.00536463	0.472284	-1.08227
Pah	P04176	Phenylalanine-4-hydroxylase OS=Rattus norvegicus OX=10116 GN=Pah PE=1 SV=3	1	114.06	24.8	55.7	0.00785824	0.0156424	0.445242	-1.16734
Fmo3	A0A0G2JSI0	Dimethylaniline monooxygenase [N-oxide-forming] OS=Rattus norvegicus OX=10116 GN=Fmo3 PE=1 SV=1	17	101.23	541.033	1160.8	0.00299147	0.00946662	0.466087	-1.10133
Abcc2	Q63120	ATP-binding cassette sub-family C member 2 OS=Rattus norvegicus OX=10116 GN=Abcc2 PE=1 SV=1	28	89.93	442.067	1228.5	9.39242e-06	0.00156446	0.359843	-1.47456
Fga	Q7TQ70	Fibrinogen alpha chain OS=Rattus norvegicus OX=10116 GN=Fga PE=1 SV=1	23	102.81	2152.43	596.567	4.42729e-05	0.00234789	3.60803	1.85121
	E0A3N4	Serpina3n-like protein OS=Rattus norvegicus OX=10116 PE=2 SV=1	15	96.28	1411	357.767	0.044569	0.0426516	3.94391	1.97963
Hp	P06866	Haptoglobin OS=Rattus norvegicus OX=10116 GN=Hp PE=1 SV=3	18	89.77	1750.5	556.8	1.05872e-05	0.00162598	3.14386	1.65254
Agxt2	Q64565	Alanine--glyoxylate aminotransferase 2, mitochondrial OS=Rattus norvegicus OX=10116 GN=Agxt2 PE=1 SV=2	17	83.18	511.6	1050.67	0.0113715	0.01905	0.486929	-1.03822
Pkm	A0A0G2JVG3	Pyruvate kinase OS=Rattus norvegicus OX=10116 GN=Pkm PE=1 SV=1	2	68.15	108.467	33.9667	0.00161242	0.00711972	3.19333	1.67506
Cyp1a2	P04799	Cytochrome P450 1A2 OS=Rattus norvegicus OX=10116 GN=Cyp1a2 PE=1 SV=2	16	69.45	446.3	1002.57	0.000384854	0.00415987	0.445157	-1.16761
Pkm	P11980	Pyruvate kinase PKM OS=Rattus norvegicus OX=10116 GN=Pkm PE=1 SV=3	1	72.8	1403.1	595.233	0.00379197	0.0107152	2.35723	1.23709
Cyp2c23	Q68G40	Cytochrome P450 2C23 OS=Rattus norvegicus OX=10116 GN=Cyp2c23 PE=1 SV=1	20	80.72	696.467	1649.73	0.0156915	0.022808	0.422169	-1.24411
Stat3	P52631	Signal transducer and activator of transcription 3 OS=Rattus norvegicus OX=10116 GN=Stat3 PE=1 SV=1	20	68.38	1188.47	444.433	0.0186103	0.0251965	2.67412	1.41906
	G3V9J1	Uncharacterized protein OS=Rattus norvegicus OX=10116 PE=1 SV=3	3	80.24	57.5333	153	0.000573344	0.0048136	0.376035	-1.41106
Cyp2e1	P05182	Cytochrome P450 2E1 OS=Rattus norvegicus OX=10116 GN=Cyp2e1 PE=1 SV=4	19	67.86	427.1	922.133	0.00352112	0.010299	0.463165	-1.1104
Apoa4	P02651	Apolipoprotein A-IV OS=Rattus norvegicus OX=10116 GN=Apoa4 PE=1 SV=2	16	60.82	534.233	1105	0.0226286	0.0282021	0.483469	-1.0485
Hpx	P20059	Hemopexin OS=Rattus norvegicus OX=10116 GN=Hpx PE=1 SV=3	18	143.61	2280.73	883.033	0.0183722	0.0250106	2.58284	1.36896
Cyp3a2	P05183	Cytochrome P450 3A2 OS=Rattus norvegicus OX=10116 GN=Cyp3a2 PE=1 SV=2	8	59.09	319.233	1391.27	0.0146492	0.0219769	0.229455	-2.12372
Cyp2c6v1	F1LR47	Cytochrome P450, family 2, subfamily C, polypeptide 6, variant 1 OS=Rattus norvegicus OX=10116 GN=Cyp2c6v1 PE=1 SV=3	1	77.66	471.833	1051.63	0.0297817	0.0334395	0.448667	-1.15628
Steap4	Q4V8K1	Metalloreductase STEAP4 OS=Rattus norvegicus OX=10116 GN=Steap4 PE=1 SV=1	14	61.49	691.5	327.667	0.03421	0.0362886	2.11038	1.0775
	P08932	T-kininogen 2 OS=Rattus norvegicus OX=10116 PE=1 SV=2	4	59.52	1077.57	173.5	0.00658959	0.0143123	6.21076	2.63477
Sult1c3	A0A0G2K5J0	Sulfotransferase OS=Rattus norvegicus OX=10116 GN=Sult1c3 PE=1 SV=1	12	60.53	431.2	1031.3	0.0193475	0.0257593	0.418113	-1.25803
Cyp2c13	Q5I0P5	Cytochrome P450 2C13, male-specific OS=Rattus norvegicus OX=10116 GN=Cyp2c13 PE=1 SV=1	1	61.09	9.3	26.1333	0.000808413	0.00549313	0.355867	-1.49059
Sec14l2	Q99MS0	SEC14-like protein 2 OS=Rattus norvegicus OX=10116 GN=Sec14l2 PE=1 SV=1	1	52.46	204.933	64.1667	0.0198438	0.0261278	3.19377	1.67526
Cyp2d4	Q64680	Cytochrome P450 2D4 OS=Rattus norvegicus OX=10116 GN=Cyp2d4 PE=2 SV=1	7	54.91	248.967	587.633	0.000983732	0.00585224	0.423677	-1.23896
	Q5D178	Alpha 2 macroglobulin cardiac isoform (Fragment) OS=Rattus norvegicus OX=10116 PE=2 SV=1	1	46.05	183.167	6.4	0.00110924	0.00611833	28.6198	4.83894
Fgb	P14480	Fibrinogen beta chain OS=Rattus norvegicus OX=10116 GN=Fgb PE=1 SV=4	18	49.47	725.467	299.267	8.28071e-05	0.00276416	2.42415	1.27748
RGD1309362	Q4V797	Interferon-gamma-inducible GTPase Ifgga1 protein OS=Rattus norvegicus OX=10116 GN=RGD1309362 PE=1 SV=1	5	52.85	243.333	83.5333	0.00618099	0.013853	2.91301	1.54251
Pyroxd2	Q68FT3	Pyridine nucleotide-disulfide oxidoreductase domain-containing protein 2 OS=Rattus norvegicus OX=10116 GN=Pyroxd2 PE=2 SV=1	11	48.21	292.233	742.933	0.0220834	0.0277629	0.393351	-1.34611
Tubb6	Q4QQV0	Tubulin beta chain OS=Rattus norvegicus OX=10116 GN=Tubb6 PE=1 SV=1	2	46.34	49.2333	21.1333	0.00563576	0.0132492	2.32965	1.22012
Ste	P49889	Estrogen sulfotransferase, isoform 3 OS=Rattus norvegicus OX=10116 GN=Ste PE=1 SV=1	4	68.86	595.833	1532.6	0.0141188	0.0215331	0.388773	-1.363
Serpina3k	P05545	Serine protease inhibitor A3K OS=Rattus norvegicus OX=10116 GN=Serpina3k PE=1 SV=3	7	49.33	191.167	389.667	0.00039128	0.00417067	0.49059	-1.02741
RGD1566134	Q9JJI4	Alpha-2u globulin OS=Rattus norvegicus OX=10116 GN=RGD1566134 PE=2 SV=1	1	63.27	16.6333	272.5	0.0281	0.0322768	0.0610398	-4.03411
Cfb	G3V615	C3/C5 convertase OS=Rattus norvegicus OX=10116 GN=Cfb PE=1 SV=1	15	44.84	786.933	321.833	3.92511e-05	0.00228588	2.44516	1.28993
	P02761	Major urinary protein OS=Rattus norvegicus OX=10116 PE=1 SV=1	2	62.03	301	1816.47	0.00433983	0.0115579	0.165706	-2.5933
Hsd3b5	P27364	NADPH-dependent 3-keto-steroid reductase Hsd3b5 OS=Rattus norvegicus OX=10116 GN=Hsd3b5 PE=1 SV=3	9	65.66	390	889.1	0.00123385	0.00640793	0.438646	-1.18887
Tgm1	P23606	Protein-glutamine gamma-glutamyltransferase K OS=Rattus norvegicus OX=10116 GN=Tgm1 PE=1 SV=1	17	40.49	1271.67	208.567	0.00607347	0.0137375	6.09717	2.60814
Mettl7b	Q562C4	Methyltransferase-like protein 7B OS=Rattus norvegicus OX=10116 GN=Mettl7b PE=1 SV=1	11	41.61	273.933	909.3	0.00214705	0.00802584	0.301257	-1.73093
Gls2	P28492	Glutaminase liver isoform, mitochondrial OS=Rattus norvegicus OX=10116 GN=Gls2 PE=2 SV=3	14	47.95	210.3	465.967	0.000598404	0.00490091	0.45132	-1.14778
Acnat2	Q5FVR5	Acyl-coenzyme A amino acid N-acyltransferase 2 OS=Rattus norvegicus OX=10116 GN=Acnat2 PE=2 SV=1	9	50.26	329.633	1191.4	0.001822	0.0074557	0.276677	-1.85372
Kng2	Q5PQU1	Kininogen 1 OS=Rattus norvegicus OX=10116 GN=Kng2 PE=2 SV=1	4	41.97	206	40.9	0.0339164	0.0361093	5.03667	2.33247
Cmpk2	D3ZC63	Cytidine/uridine monophosphate kinase 2 OS=Rattus norvegicus OX=10116 GN=Cmpk2 PE=1 SV=3	11	40.82	359.4	84.8	0.000172585	0.00348435	4.23821	2.08345
Cyp3a18	G3V635	Unspecific monooxygenase OS=Rattus norvegicus OX=10116 GN=Cyp3a18 PE=1 SV=1	8	44.85	323.133	825.3	0.0454965	0.043223	0.391534	-1.35279
Anxa1	P07150	Annexin A1 OS=Rattus norvegicus OX=10116 GN=Anxa1 PE=1 SV=2	12	44.58	649.267	321.233	0.0156076	0.0227431	2.02117	1.01519
Cyp3a1	P04800	Cytochrome P450 3A1 OS=Rattus norvegicus OX=10116 GN=Cyp3a1 PE=1 SV=1	1	39.51	19.8333	87.7667	0.00247828	0.00862224	0.225978	-2.14575
Ste2	P49890	Estrogen sulfotransferase Ste2 OS=Rattus norvegicus OX=10116 GN=Ste2 PE=1 SV=1	2	61.29	20.7667	83.9333	0.0482747	0.044899	0.247419	-2.01497
Fgg	P02680	Fibrinogen gamma chain OS=Rattus norvegicus OX=10116 GN=Fgg PE=1 SV=3	13	45.2	1281.4	329.033	5.80437e-05	0.00247225	3.89444	1.96142
Hsd17b2	Q62730	Estradiol 17-beta-dehydrogenase 2 OS=Rattus norvegicus OX=10116 GN=Hsd17b2 PE=2 SV=1	12	40.63	205.9	718.033	0.00108165	0.00604929	0.286755	-1.80211
Impdh2	Q6P9U9	Inosine-5'-monophosphate dehydrogenase OS=Rattus norvegicus OX=10116 GN=Impdh2 PE=2 SV=1	12	37.7	692.067	316.767	0.000324093	0.00404047	2.18478	1.12749
Ddx21	Q3B8Q1	Nucleolar RNA helicase 2 OS=Rattus norvegicus OX=10116 GN=Ddx21 PE=2 SV=1	13	42.81	882.6	392.867	1.46695e-05	0.00177902	2.24656	1.16772
Gbp2	Q63663	Guanylate-binding protein 1 OS=Rattus norvegicus OX=10116 GN=Gbp2 PE=1 SV=2	10	37.89	694.6	176.1	0.0027599	0.00909189	3.94435	1.97979
Plin2	F6QBA3	Perilipin OS=Rattus norvegicus OX=10116 GN=Plin2 PE=1 SV=1	11	37.34	596	239.533	0.0257408	0.0305711	2.48817	1.31509
Gpt2	A0A0G2JV84	Glutamic--pyruvic transaminase 2 OS=Rattus norvegicus OX=10116 GN=Gpt2 PE=1 SV=1	11	35.78	167.433	352.233	0.00889992	0.0166051	0.475348	-1.07294
Ifit1	Q9JJT1	Glucocorticoid-attenuated response gene 16 product OS=Rattus norvegicus OX=10116 GN=Ifit1 PE=2 SV=1	10	37.75	904.733	136.967	0.000640584	0.0050386	6.6055	2.72367
LOC100910877	A0A0G2JT98	Unspecific monooxygenase OS=Rattus norvegicus OX=10116 GN=LOC100910877 PE=1 SV=1	2	38.82	106.7	670.367	0.0236092	0.0289734	0.159167	-2.65139
	Q8VD45	UDP-glucuronosyltransferase OS=Rattus norvegicus OX=10116 PE=2 SV=1	1	40.95	77.0333	5.13333	0.0152591	0.0224696	15.0065	3.90752
Ppp2r1b	Q4QQT4	Serine/threonine-protein phosphatase 2A 65 kDa regulatory subunit A beta isoform OS=Rattus norvegicus OX=10116 GN=Ppp2r1b PE=2 SV=1	3	37.84	81.6	28.3	0.0196613	0.0259932	2.88339	1.52777
Irgm2	J7P1Z1	Interferon-gamma-inducible GTPase Ifggd2 protein OS=Rattus norvegicus OX=10116 GN=Irgm2 PE=3 SV=1	1	33.26	68.7667	29.2	0.00449843	0.0117886	2.35502	1.23574
RT1.Alu	Q95577	Major histocompatibility complex class I OS=Rattus norvegicus OX=10116 GN=RT1.Alu PE=2 SV=1	4	34.1	233.567	81.7667	0.029999	0.033586	2.8565	1.51425
Akr1c1	Q3MHS3	Aldo-keto reductase family 1, member C1 OS=Rattus norvegicus OX=10116 GN=Akr1c1 PE=1 SV=1	5	34.47	119	303.4	0.000463544	0.0043969	0.392221	-1.35026
Gnmt	P13255	Glycine N-methyltransferase OS=Rattus norvegicus OX=10116 GN=Gnmt PE=1 SV=2	9	44.02	344.667	811.133	0.000532095	0.00466267	0.42492	-1.23474
Agt	P01015	Angiotensinogen OS=Rattus norvegicus OX=10116 GN=Agt PE=1 SV=1	7	31.8	476.2	218.533	0.000797337	0.00546698	2.17907	1.12371
Sult1a1	P17988	Sulfotransferase 1A1 OS=Rattus norvegicus OX=10116 GN=Sult1a1 PE=1 SV=1	9	42.02	350.867	758.367	0.000512895	0.00459173	0.462661	-1.11197
Ndrg2	A0A0G2JSV0	Protein NDRG2 OS=Rattus norvegicus OX=10116 GN=Ndrg2 PE=1 SV=1	8	31.87	154.7	336.2	0.00190908	0.00758124	0.460143	-1.11985
Cyp39a1	D4AE09	Cytochrome P450, family 39, subfamily a, polypeptide 1 OS=Rattus norvegicus OX=10116 GN=Cyp39a1 PE=1 SV=1	9	35.01	253.233	518	0.000188203	0.00357161	0.488867	-1.03248
Mpo	A0A0G2K1A2	Myeloperoxidase OS=Rattus norvegicus OX=10116 GN=Mpo PE=1 SV=1	10	36.28	751.533	138.7	0.00784373	0.0156285	5.41841	2.43787
Slco1b2	Q9QZX8	Solute carrier organic anion transporter family member 1B2 OS=Rattus norvegicus OX=10116 GN=Slco1b2 PE=1 SV=2	12	38.39	302.833	783.133	0.000318795	0.00402829	0.386694	-1.37073
Clu	G3V836	Clusterin OS=Rattus norvegicus OX=10116 GN=Clu PE=1 SV=1	10	27.24	502.367	198.433	0.00202408	0.00778966	2.53166	1.34009
LOC100362350	F1LP50	17-beta-hydroxysteroid dehydrogenase type 6 OS=Rattus norvegicus OX=10116 GN=LOC100362350 PE=1 SV=3	1	36.4	322.2	712.067	0.0136577	0.0211353	0.452486	-1.14406
Ifit2	Q4V8H9	Interferon-induced protein with tetratricopeptide repeats 2 OS=Rattus norvegicus OX=10116 GN=Ifit2 PE=1 SV=1	12	29.44	609.567	120.267	8.05431e-05	0.00273901	5.06846	2.34155
Ifit3	Q6AYE7	Interferon-induced protein with tetratricopeptide repeats 3 OS=Rattus norvegicus OX=10116 GN=Ifit3 PE=1 SV=1	12	25.79	679.333	110.133	9.17429e-05	0.00285502	6.16828	2.62487
	Q80YG1	Phosphoserine aminotransferase OS=Rattus norvegicus OX=10116 PE=2 SV=1	11	31.95	458.5	104.933	0.00528896	0.0128368	4.36944	2.12745
Serpina3m	F1LR92	Serine protease inhibitor A3M OS=Rattus norvegicus OX=10116 GN=Serpina3m PE=1 SV=3	6	25.51	69.9	179.8	0.0120485	0.0196758	0.388765	-1.36303
Dhrs7l1	M0R4N4	Dehydrogenase/reductase (SDR family) member 7-like 1 OS=Rattus norvegicus OX=10116 GN=Dhrs7l1 PE=1 SV=2	4	31.17	228.533	573.433	0.0134093	0.020916	0.398535	-1.32722
Urad	M0RCU5	Parahox neighbor OS=Rattus norvegicus OX=10116 GN=Urad PE=1 SV=2	7	34.82	220.733	457	0.000212636	0.00368892	0.483005	-1.04989
Slc38a3	Q9JHZ9	Sodium-coupled neutral amino acid transporter 3 OS=Rattus norvegicus OX=10116 GN=Slc38a3 PE=2 SV=1	7	22.49	436.433	199.3	2.26733e-05	0.00199547	2.18983	1.13082
Prg4	F1LRA5	Proteoglycan 4 OS=Rattus norvegicus OX=10116 GN=Prg4 PE=1 SV=2	9	26.77	711.933	76.3667	0.00377081	0.0106837	9.32257	3.22073
Serping1	Q6P734	Plasma protease C1 inhibitor OS=Rattus norvegicus OX=10116 GN=Serping1 PE=2 SV=1	6	23.94	396.4	177.567	6.24291e-05	0.00250218	2.2324	1.1586
Ctps1	B1WC02	CTP synthase OS=Rattus norvegicus OX=10116 GN=Ctps1 PE=1 SV=1	8	17.67	211.1	94.1	0.000403435	0.00419554	2.24336	1.16566
Ttc36	Q66H45	Tetratricopeptide repeat protein 36 OS=Rattus norvegicus OX=10116 GN=Ttc36 PE=1 SV=1	8	31	392.7	786.433	0.00121316	0.00636221	0.499343	-1.0019
Dhrs7l1	Q6I7R1	Dehydrogenase/reductase (SDR family) member 7 OS=Rattus norvegicus OX=10116 GN=Dhrs7l1 PE=1 SV=1	3	27.6	52.5333	287.467	0.0125605	0.0201397	0.182746	-2.45209
	Q62905	Vitronectin OS=Rattus norvegicus OX=10116 PE=2 SV=1	6	28.99	325.5	147.233	0.0282614	0.0323907	2.21078	1.14455
Slc2a2	P12336	Solute carrier family 2, facilitated glucose transporter member 2 OS=Rattus norvegicus OX=10116 GN=Slc2a2 PE=2 SV=1	6	25.75	150.433	303.2	0.00118801	0.00630541	0.496152	-1.01115
Fabp5	P55053	Fatty acid-binding protein 5 OS=Rattus norvegicus OX=10116 GN=Fabp5 PE=1 SV=3	6	22.27	374.7	171.567	0.0493057	0.0455088	2.18399	1.12697
Hmox1	P06762	Heme oxygenase 1 OS=Rattus norvegicus OX=10116 GN=Hmox1 PE=1 SV=1	5	20.53	421.233	67.3333	0.000605983	0.00492648	6.25594	2.64523
Serpina10	Q62975	Protein Z-dependent protease inhibitor OS=Rattus norvegicus OX=10116 GN=Serpina10 PE=2 SV=2	7	22.59	281.833	119.733	9.32294e-05	0.00286895	2.35384	1.23502
Nceh1	B2GV54	Neutral cholesterol ester hydrolase 1 OS=Rattus norvegicus OX=10116 GN=Nceh1 PE=1 SV=1	5	22.76	221.033	106.567	0.000714974	0.00525659	2.07413	1.05251
Cyp4b1	P15129	Cytochrome P450 4B1 OS=Rattus norvegicus OX=10116 GN=Cyp4b1 PE=1 SV=3	6	16.75	265.9	117.967	0.0330365	0.0355639	2.25403	1.1725
Sqle	P52020	Squalene monooxygenase OS=Rattus norvegicus OX=10116 GN=Sqle PE=1 SV=1	8	21.69	364.767	175.467	0.00272727	0.0090366	2.07884	1.05578
	Q6P769	Uncharacterized protein OS=Rattus norvegicus OX=10116 PE=2 SV=1	4	22.55	472.933	229.9	1.3869e-05	0.00175431	2.05713	1.04063
Slco2b1	Q9JHI3	Solute carrier organic anion transporter family member 2B1 OS=Rattus norvegicus OX=10116 GN=Slco2b1 PE=1 SV=1	7	22.27	140.733	365.367	1.40583e-05	0.00176035	0.385184	-1.37638
Mx1	Q499S4	Interferon-induced GTP-binding protein Mx1 OS=Rattus norvegicus OX=10116 GN=Mx1 PE=1 SV=1	5	19.65	259.733	62.7	0.00487011	0.0123015	4.14248	2.05049
RT1.A	A7LNF8	MHC class I antigen (Fragment) OS=Rattus norvegicus OX=10116 GN=RT1.A PE=2 SV=1	2	17.51	29.4	88.9	0.0209536	0.026923	0.330709	-1.59637
Slco2a1	A0A0G2JV79	Solute carrier organic anion transporter family member OS=Rattus norvegicus OX=10116 GN=Slco2a1 PE=1 SV=1	8	20.69	171.033	625	1.71626e-05	0.00184443	0.273653	-1.86958
Cyp3a9	M0RDI0	Unspecific monooxygenase OS=Rattus norvegicus OX=10116 GN=Cyp3a9 PE=1 SV=2	4	19.89	62.1667	204.4	0.00663993	0.0143697	0.304142	-1.71718
Niban1	Q9ESN0	Protein Niban 1 OS=Rattus norvegicus OX=10116 GN=Niban1 PE=1 SV=2	7	15.61	512.467	199.433	0.00180821	0.00743511	2.56961	1.36155
Orm1	P02764	Alpha-1-acid glycoprotein OS=Rattus norvegicus OX=10116 GN=Orm1 PE=2 SV=1	7	28.31	1248.07	113.1	0.00634043	0.0140232	11.0351	3.46402
Cyp2t1	A0A0G2K2P4	Cytochrome P450, family 2, subfamily t, polypeptide 1 OS=Rattus norvegicus OX=10116 GN=Cyp2t1 PE=1 SV=1	6	14.5	207.6	422.1	0.0473467	0.0443457	0.491827	-1.02378
Uox	P09118	Uricase OS=Rattus norvegicus OX=10116 GN=Uox PE=1 SV=3	5	20.22	134.033	308.567	0.0328773	0.0354639	0.434374	-1.20299
Icam1	Q00238	Intercellular adhesion molecule 1 OS=Rattus norvegicus OX=10116 GN=Icam1 PE=2 SV=1	6	15.71	188.733	91.0667	0.000381832	0.00415469	2.07247	1.05135
Ptpn1	P20417	Tyrosine-protein phosphatase non-receptor type 1 OS=Rattus norvegicus OX=10116 GN=Ptpn1 PE=1 SV=1	5	14.05	122.2	50.9667	0.000100285	0.00293106	2.39765	1.26162
Rhob	P62747	Rho-related GTP-binding protein RhoB OS=Rattus norvegicus OX=10116 GN=Rhob PE=1 SV=1	2	14.38	43.2667	16.3333	0.0190273	0.0255172	2.64898	1.40544
Apcs	H6X320	Pentaxin OS=Rattus norvegicus OX=10116 GN=Apcs PE=3 SV=1	7	15.37	136.633	280.733	0.000225086	0.00374128	0.486701	-1.03889
Clec4f	P10716	C-type lectin domain family 4 member F OS=Rattus norvegicus OX=10116 GN=Clec4f PE=1 SV=1	6	16.49	96.4333	295.1	0.0409226	0.040344	0.326782	-1.6136
	O70211	Insulin-like growth factor binding protein complex acid-labile subunit OS=Rattus norvegicus OX=10116 PE=4 SV=1	6	13.44	61.9333	135.267	0.00235181	0.00840455	0.457861	-1.12702
Tes	Q2LAP6	Testin OS=Rattus norvegicus OX=10116 GN=Tes PE=1 SV=1	5	13.64	180.1	75.0667	0.000299952	0.0039822	2.3992	1.26255
Fgl1	Q5M8C6	Fibrinogen-like protein 1 OS=Rattus norvegicus OX=10116 GN=Fgl1 PE=2 SV=1	6	14.96	301.4	118.2	4.01976e-05	0.00229848	2.54992	1.35045
Lbp	Q63313	Lipopolysaccharide-binding protein OS=Rattus norvegicus OX=10116 GN=Lbp PE=2 SV=1	6	13.28	306	32.5333	0.00891486	0.0166185	9.40574	3.23354
F11	A0A0G2K4I9	Coagulation factor XI OS=Rattus norvegicus OX=10116 GN=F11 PE=1 SV=1	6	10.31	134.033	322.5	0.00168834	0.0072474	0.415607	-1.26671
Ptprd	M0RB22	Protein-tyrosine-phosphatase OS=Rattus norvegicus OX=10116 GN=Ptprd PE=1 SV=2	6	7.46	57.4333	142.667	0.00027141	0.00390274	0.40257	-1.31269
Gnl3	Q811S9	Guanine nucleotide-binding protein-like 3 OS=Rattus norvegicus OX=10116 GN=Gnl3 PE=1 SV=1	4	13.62	139.467	67.4333	0.00199577	0.0077333	2.06822	1.04839
Obp3	Q78E14	Obp3 protein OS=Rattus norvegicus OX=10116 GN=Obp3 PE=2 SV=1	3	14.65	9.16667	29.2333	0.0295644	0.0332923	0.313569	-1.67315
Lyplal1	D3ZFS7	Lysophospholipase-like 1 OS=Rattus norvegicus OX=10116 GN=Lyplal1 PE=3 SV=2	5	12.98	57.7333	156.567	0.00810966	0.0158801	0.368746	-1.4393
Etnppl	M0R7F6	Ethanolamine-phosphate phospho-lyase OS=Rattus norvegicus OX=10116 GN=Etnppl PE=1 SV=1	6	14.1	140.033	302.3	0.0364349	0.0376557	0.463226	-1.11021
Fads2	Q9Z122	Acyl-CoA 6-desaturase OS=Rattus norvegicus OX=10116 GN=Fads2 PE=1 SV=1	5	15.81	151.433	335.233	0.00802096	0.0157971	0.451725	-1.14648
Abcg3l4	Q498U1	Similar to ATP-binding cassette, sub-family G (WHITE), member 3 OS=Rattus norvegicus OX=10116 GN=Abcg3l4 PE=2 SV=1	3	14.95	88.3	178	0.00028665	0.00394674	0.496067	-1.01139
Gbp5	F1M9F6	Guanylate-binding protein 5 OS=Rattus norvegicus OX=10116 GN=Gbp5 PE=1 SV=1	6	13.11	154.5	32.9	0.0335909	0.0359089	4.69605	2.23145
Nnmt	D4A605	Nicotinamide N-methyltransferase OS=Rattus norvegicus OX=10116 GN=Nnmt PE=1 SV=1	4	14.57	342.7	143.5	0.000305841	0.0039971	2.38815	1.2559
Asrgl1	Q8VI04	Isoaspartyl peptidase/L-asparaginase OS=Rattus norvegicus OX=10116 GN=Asrgl1 PE=1 SV=1	6	8.55	48.2667	96.9	0.0138836	0.0213316	0.498108	-1.00547
RGD1564865	F1LU12	Similar to 20-alpha-hydroxysteroid dehydrogenase OS=Rattus norvegicus OX=10116 GN=RGD1564865 PE=1 SV=2	2	13.81	20.7667	56.6333	0.00302116	0.00951254	0.366686	-1.44738
Lgals3bp	O70513	Galectin-3-binding protein OS=Rattus norvegicus OX=10116 GN=Lgals3bp PE=1 SV=2	4	12.72	93.9333	43.6	0.0124974	0.0200803	2.15443	1.10731
Mbl2	P08661	Mannose-binding protein C OS=Rattus norvegicus OX=10116 GN=Mbl2 PE=1 SV=2	4	12.94	69.5	157.333	5.02108e-05	0.00240828	0.441737	-1.17874
Thrsp	Q5HZE3	Thyroid hormone responsive OS=Rattus norvegicus OX=10116 GN=Thrsp PE=1 SV=1	4	14.6	23.4	91.9667	2.22783e-05	0.00198585	0.25444	-1.9746
Herc6	F1LPM8	HECT and RLD domain-containing E3 ubiquitin protein ligase family member 6 OS=Rattus norvegicus OX=10116 GN=Herc6 PE=4 SV=3	6	9.88	249	89.1	0.00104803	0.00596251	2.79461	1.48265
Mthfd1l	B2GUZ3	Formyltetrahydrofolate synthetase OS=Rattus norvegicus OX=10116 GN=Mthfd1l PE=1 SV=1	3	7.93	21.9667	6.36667	0.0004362	0.00430927	3.45026	1.78671
Cnp	P13233	2',3'-cyclic-nucleotide 3'-phosphodiesterase OS=Rattus norvegicus OX=10116 GN=Cnp PE=1 SV=2	4	10.6	189.867	76.9	0.0258987	0.0306853	2.46901	1.30393
Mt1m	D3ZHV3	Metallothionein OS=Rattus norvegicus OX=10116 GN=Mt1m PE=3 SV=1	3	8.46	265.1	27.2667	0.000780399	0.00542606	9.72249	3.28133
Oasl	G3V645	2'-5'-oligoadenylate synthase-like protein 1 OS=Rattus norvegicus OX=10116 GN=Oasl PE=2 SV=1	4	10.99	77.5667	26.9333	0.00503465	0.0125169	2.87995	1.52604
Slc41a2	D4A7D4	Solute carrier family 41 member 2 OS=Rattus norvegicus OX=10116 GN=Slc41a2 PE=3 SV=2	3	9.06	82.3667	39.3333	0.013917	0.0213604	2.09407	1.06631
Hk2	P27881	Hexokinase-2 OS=Rattus norvegicus OX=10116 GN=Hk2 PE=1 SV=1	4	6.67	40.1667	11.1667	0.000264399	0.00388115	3.59701	1.8468
	Q6LE95	Kininogen OS=Rattus norvegicus OX=10116 PE=4 SV=1	1	12.04	30.0667	7.3	0.000184026	0.00354932	4.11872	2.0422
Rpl22l1	B2RZD5	RCG41580, isoform CRA_a OS=Rattus norvegicus OX=10116 GN=Rpl22l1 PE=2 SV=1	3	9.55	151.133	73.8333	0.0105858	0.0182818	2.04695	1.03348
Lcn2	P30152	Neutrophil gelatinase-associated lipocalin OS=Rattus norvegicus OX=10116 GN=Lcn2 PE=1 SV=2	2	9.49	176.267	10.6	0.00841214	0.0161559	16.6289	4.05562
Akr1b8	Q91W30	Aldose reductase-like protein OS=Rattus norvegicus OX=10116 GN=Akr1b8 PE=2 SV=1	1	12.74	59.5667	14.9667	0.0499438	0.0458824	3.97996	1.99275
Mnda	Q5U2R8	Interferon activated gene 204 OS=Rattus norvegicus OX=10116 GN=Mnda PE=1 SV=1	4	6.92	256.3	110.9	0.00752336	0.0153134	2.31109	1.20857
Asns	P49088	Asparagine synthetase [glutamine-hydrolyzing] OS=Rattus norvegicus OX=10116 GN=Asns PE=2 SV=3	2	9.19	146.9	21.7667	0.0162814	0.0232864	6.74885	2.75464
	P83121	Urinary protein 3 OS=Rattus norvegicus OX=10116 PE=3 SV=1	2	8.35	11.3	37.1333	6.29062e-05	0.00250523	0.304309	-1.71639
Pum3	Q562C7	Pumilio homolog 3 OS=Rattus norvegicus OX=10116 GN=Pum3 PE=2 SV=1	4	6.71	157	71.8333	0.00101074	0.00589977	2.18561	1.12804
Xpnpep2	Q99MA2	Xaa-Pro aminopeptidase 2 OS=Rattus norvegicus OX=10116 GN=Xpnpep2 PE=1 SV=1	3	10.42	82.1667	245.2	7.41358e-05	0.00266242	0.335101	-1.57733
Il1rn	P25086	Interleukin-1 receptor antagonist protein OS=Rattus norvegicus OX=10116 GN=Il1rn PE=2 SV=1	2	7.99	20.4667	5.46667	0.000269458	0.00389682	3.7439	1.90454
Ubap2	A0A0U1RRQ3	Ubiquitin-associated protein 2 OS=Rattus norvegicus OX=10116 GN=Ubap2 PE=1 SV=1	3	7.1	27.5667	13.7	0.00876115	0.0164793	2.01217	1.00875
Sdc4	P34901	Syndecan-4 OS=Rattus norvegicus OX=10116 GN=Sdc4 PE=1 SV=1	3	6.23	73.2667	32.6333	0.0195437	0.0259059	2.24515	1.16681
Cxng	A0A654IET2	Connexin-32 OS=Rattus norvegicus OX=10116 GN=Cxng PE=3 SV=1	3	6.25	44.7	138.3	0.0107913	0.0184872	0.32321	-1.62945
Ybx3	D4A0L4	Y-box-binding protein 3 OS=Rattus norvegicus OX=10116 GN=Ybx3 PE=1 SV=3	1	7.92	56.7667	27.2333	0.000839436	0.00556393	2.08446	1.05967
	A0A0G2JVT8	Uncharacterized protein OS=Rattus norvegicus OX=10116 PE=1 SV=1	4	8.14	125.133	51.6	0.0129317	0.0204844	2.42506	1.27802
Aamdc	D3ZZQ4	Adipogenesis-associated, Mth938 domain-containing OS=Rattus norvegicus OX=10116 GN=Aamdc PE=1 SV=1	3	6.78	53.5	115.6	0.0014815	0.00689881	0.462803	-1.11153
Alpl	A0A0G2K0X8	Alkaline phosphatase OS=Rattus norvegicus OX=10116 GN=Alpl PE=1 SV=1	3	7.86	254.367	110.733	0.0211941	0.0270926	2.29711	1.19982
Nos1ap	A0A0F7L1S7	Nitric oxide synthase 1 adaptor protein isoform e OS=Rattus norvegicus OX=10116 GN=Nos1ap PE=2 SV=1	3	5.68	124.767	49.0333	0.0162719	0.0232782	2.54453	1.3474
Itgam	G3V8L7	Integrin alpha M OS=Rattus norvegicus OX=10116 GN=Itgam PE=1 SV=1	4	4.67	144.133	48.5	0.000692818	0.0051947	2.97182	1.57135
Slc22a1	Q63089	Solute carrier family 22 member 1 OS=Rattus norvegicus OX=10116 GN=Slc22a1 PE=1 SV=1	3	4.64	26.3	64.3667	0.00122868	0.00639658	0.408597	-1.29125
Lipc	P07867	Hepatic triacylglycerol lipase OS=Rattus norvegicus OX=10116 GN=Lipc PE=1 SV=2	3	8.53	49.4667	129.067	4.85468e-05	0.00239255	0.383264	-1.38359
S100a4	P05942	Protein S100-A4 OS=Rattus norvegicus OX=10116 GN=S100a4 PE=2 SV=1	3	5.4	197.4	94.6	0.00695548	0.0147202	2.08668	1.06121
Tsr1	D3ZEM8	RCG34104, isoform CRA_a OS=Rattus norvegicus OX=10116 GN=Tsr1 PE=1 SV=1	3	4.56	60.4	28.6667	8.7619e-05	0.00281467	2.10698	1.07517
Fam3c	A0A0G2JUB0	Protein FAM3C OS=Rattus norvegicus OX=10116 GN=Fam3c PE=1 SV=1	3	6.2	89.5333	41.1	0.00277791	0.00912213	2.17843	1.12329
Ctsg	G3V9Q7	Cathepsin G OS=Rattus norvegicus OX=10116 GN=Ctsg PE=1 SV=1	2	6.51	233.133	45.1	0.000478535	0.00445679	5.16925	2.36996
Bysl	Q80WL2	Bystin OS=Rattus norvegicus OX=10116 GN=Bysl PE=1 SV=3	3	5.47	204.633	88.7667	0.000163073	0.00342552	2.30529	1.20495
S100a8	P50115	Protein S100-A8 OS=Rattus norvegicus OX=10116 GN=S100a8 PE=1 SV=3	3	8.6	310.1	47.2667	1.19861e-05	0.00168684	6.56065	2.71384
Creg1	B2GUX7	Cellular repressor of E1A-stimulated genes (Predicted), isoform CRA_b OS=Rattus norvegicus OX=10116 GN=Creg1 PE=1 SV=1	1	7.35	34.2	70.1667	0.000101624	0.00294214	0.487411	-1.03679
Map7d1	D4A644	MAP7 domain-containing 1 OS=Rattus norvegicus OX=10116 GN=Map7d1 PE=1 SV=1	3	7.34	132.9	62.5333	0.000465668	0.00440341	2.12527	1.08764
Mak16	Q5EB56	Protein MAK16 homolog OS=Rattus norvegicus OX=10116 GN=Mak16 PE=1 SV=1	1	4.49	16.7	7.9	0.000532772	0.00466512	2.11392	1.07992
Abcg2	Q80W57	Broad substrate specificity ATP-binding cassette transporter ABCG2 OS=Rattus norvegicus OX=10116 GN=Abcg2 PE=1 SV=1	3	4.23	31.2667	13.7333	0.0269068	0.0314188	2.2767	1.18694
S100a9	A0A0H2UHJ1	Protein S100-A9 OS=Rattus norvegicus OX=10116 GN=S100a9 PE=1 SV=1	2	6.53	75.3667	17.3667	0.000107786	0.00299059	4.33973	2.11761
Ppp1r3b	Q6IN01	Protein phosphatase 1 regulatory subunit 3B OS=Rattus norvegicus OX=10116 GN=Ppp1r3b PE=1 SV=1	3	6.55	58.9667	171.6	0.00104204	0.00595265	0.343629	-1.54108
Lyz1	P00697	Lysozyme C-1 OS=Rattus norvegicus OX=10116 GN=Lyz1 PE=1 SV=2	2	7.2	149.2	50.1333	0.00159293	0.00708827	2.97606	1.57341
Np4	Q62714	Neutrophil antibiotic peptide NP-4 OS=Rattus norvegicus OX=10116 GN=Np4 PE=1 SV=1	2	7.01	240.667	27.2667	0.0331984	0.0356651	8.82641	3.14183
LOC103689968	A0A0G2K4L3	Zinc finger protein 622 OS=Rattus norvegicus OX=10116 GN=LOC103689968 PE=1 SV=1	2	5.04	63.7667	28.6333	0.000367523	0.00412918	2.22701	1.15511
Slc4a4	Q9JI66	Electrogenic sodium bicarbonate cotransporter 1 OS=Rattus norvegicus OX=10116 GN=Slc4a4 PE=1 SV=1	3	6.67	270.367	117.567	0.000330579	0.00405493	2.29969	1.20144
Map1lc3b2	A0A0G2K9Q7	Uncharacterized protein OS=Rattus norvegicus OX=10116 GN=Map1lc3b2 PE=3 SV=1	1	5.79	222.533	83.1667	0.0027558	0.00908498	2.67575	1.41994
S100a6	P05964	Protein S100-A6 OS=Rattus norvegicus OX=10116 GN=S100a6 PE=1 SV=3	3	7.04	315	157.5	0.0476594	0.044533	2	1
Cebpz	D3ZNU1	CCAAT/enhancer-binding protein zeta OS=Rattus norvegicus OX=10116 GN=Cebpz PE=1 SV=1	2	5.12	29.0333	13.1	0.00213699	0.00800703	2.21628	1.14814
Sowahc	M0R7U6	RCG63233 OS=Rattus norvegicus OX=10116 GN=Sowahc PE=1 SV=1	2	4.51	54.3667	26.9	0.00102558	0.00592512	2.02107	1.01512
Synpo	A0A0H2UHQ9	Synaptopodin OS=Rattus norvegicus OX=10116 GN=Synpo PE=1 SV=1	3	6.81	256.6	111.867	0.000113953	0.0030352	2.2938	1.19774
Slc28a2	F1LN73	Sodium/nucleoside cotransporter OS=Rattus norvegicus OX=10116 GN=Slc28a2 PE=1 SV=3	2	5.29	17.0333	38.8667	0.000312039	0.00401229	0.43825	-1.19017
Adipor2	G3V707	Adiponectin receptor 2 OS=Rattus norvegicus OX=10116 GN=Adipor2 PE=3 SV=1	2	5.04	17.8	41.0333	0.000420992	0.00425731	0.433794	-1.20492
Ncf1	F1M707	Neutrophil cytosolic factor 1 OS=Rattus norvegicus OX=10116 GN=Ncf1 PE=1 SV=2	2	2.7	44	12.3667	0.00101332	0.00590421	3.55795	1.83105
Clec4g	A0A0G2JU13	C-type lectin domain family 4, member G OS=Rattus norvegicus OX=10116 GN=Clec4g PE=1 SV=1	2	6.02	23.5333	52.6667	0.0094565	0.0170964	0.446835	-1.16218
Saa4	Q5M878	Serum amyloid A protein OS=Rattus norvegicus OX=10116 GN=Saa4 PE=1 SV=1	2	5.06	384.233	158.367	0.000948546	0.00578752	2.42623	1.27871
Vcam1	P29534	Vascular cell adhesion protein 1 OS=Rattus norvegicus OX=10116 GN=Vcam1 PE=1 SV=1	3	6.31	274.367	120.133	0.0018902	0.00755467	2.28385	1.19147
Scd1	P07308	Acyl-CoA desaturase 1 OS=Rattus norvegicus OX=10116 GN=Scd1 PE=1 SV=2	3	2.25	32.2	161.9	0.000128678	0.00316626	0.198888	-2.32997
Sirpa	Q499T3	Sirpa protein OS=Rattus norvegicus OX=10116 GN=Sirpa PE=1 SV=1	2	4.47	165.7	41	0.000113403	0.00303137	4.04146	2.01488
Il1r1	Q05KR1	Interleukin 1 bete receptor type 1 long transmembrane form OS=Rattus norvegicus OX=10116 GN=Il1r1 PE=1 SV=1	2	2.65	33.5	9.06667	0.000542346	0.00469933	3.69485	1.88552
Rbm3	G3V6P6	RNA binding motif protein 3, isoform CRA_a OS=Rattus norvegicus OX=10116 GN=Rbm3 PE=1 SV=1	2	3.87	161.533	50.1667	0.00250838	0.00867236	3.21993	1.68703
RT1-Db1	Q9TQA6	Class II MHC RT1.D(N) beta chain OS=Rattus norvegicus OX=10116 GN=RT1-Db1 PE=1 SV=1	2	2.56	16.8	60.1	0.00850299	0.0162397	0.279534	-1.8389
	P81828	Urinary protein 2 OS=Rattus norvegicus OX=10116 PE=1 SV=1	1	5.23	15.1333	43.7333	0.00191849	0.00759437	0.346037	-1.531
Angptl3	F7FHP0	Angiopoietin-like 3 OS=Rattus norvegicus OX=10116 GN=Angptl3 PE=1 SV=1	2	4.4	19.5	100.933	2.36012e-06	0.000814592	0.193197	-2.37186
Gzmb	P18291	Granzyme B OS=Rattus norvegicus OX=10116 GN=Gzmb PE=1 SV=1	1	4.11	26.7333	8.7	0.0119946	0.0196272	3.0728	1.61955
Wdr72	A0A0G2K3H7	WD repeat domain 72 OS=Rattus norvegicus OX=10116 GN=Wdr72 PE=4 SV=1	1	7.87	70.8333	192.033	0.000820303	0.00552068	0.36886	-1.43886
Myorg	D4AE63	Myogenesis-regulating glycosidase OS=Rattus norvegicus OX=10116 GN=Myorg PE=1 SV=1	2	4.08	95.8	45.6667	0.0414296	0.0406565	2.09781	1.06888
Ciapin1	Q5XID1	Anamorsin OS=Rattus norvegicus OX=10116 GN=Ciapin1 PE=1 SV=1	2	3.94	69.3	29.6	0.00842771	0.0161699	2.34122	1.22726
Stac3	D3ZQN6	SH3 and cysteine rich domain 3 (Predicted) OS=Rattus norvegicus OX=10116 GN=Stac3 PE=4 SV=1	2	2.55	5.9	54.0667	0.0281108	0.0322844	0.109125	-3.19595
Ifrd1	P20695	Interferon-related developmental regulator 1 OS=Rattus norvegicus OX=10116 GN=Ifrd1 PE=2 SV=1	2	3.88	57.4	14.0333	0.000586806	0.00486104	4.09026	2.03219
Dsc2	A0A0G2K3I3	Desmocollin 2 OS=Rattus norvegicus OX=10116 GN=Dsc2 PE=1 SV=1	1	6.18	94.9333	25.1	0.00569436	0.0133164	3.7822	1.91923
	P81827	Urinary protein 1 OS=Rattus norvegicus OX=10116 PE=1 SV=1	1	2.9	15.6333	40.1667	0.000728083	0.00529209	0.389212	-1.36137
Ttr	P02767	Transthyretin OS=Rattus norvegicus OX=10116 GN=Ttr PE=1 SV=1	1	3.18	28.9333	68.1333	0.00163526	0.00715889	0.424658	-1.23563
Rcl1	G3V7Z1	RCG47403 OS=Rattus norvegicus OX=10116 GN=Rcl1 PE=1 SV=3	2	2.57	17.3333	8.53333	0.0370601	0.038029	2.03125	1.02237
Alpk3	D3ZH28	Alpha-kinase 3 OS=Rattus norvegicus OX=10116 GN=Alpk3 PE=1 SV=2	1	6.31	75	262.233	0.00127927	0.0065059	0.286005	-1.80589
Ppbp	Q99ME0	CXC chemokine RTCK1 OS=Rattus norvegicus OX=10116 GN=Ppbp PE=1 SV=1	1	2.37	8	16.9	0.0373085	0.0381758	0.473373	-1.07895
	A0A096MJR6	Poly [ADP-ribose] polymerase (Fragment) OS=Rattus norvegicus OX=10116 PE=1 SV=1	1	2.91	50.5333	6.26667	0.036039	0.0374166	8.06383	3.01147
Galnt4	Q3KR95	Polypeptide N-acetylgalactosaminyltransferase OS=Rattus norvegicus OX=10116 GN=Galnt4 PE=2 SV=1	2	3.92	151.5	70.5333	0.00357683	0.010387	2.14792	1.10294
Plscr1	Q5U351	Phospholipid scramblase OS=Rattus norvegicus OX=10116 GN=Plscr1 PE=2 SV=1	1	2.37	29.0667	5.76667	0.000287836	0.00395001	5.04046	2.33356
Tmem230	Q5BJP5	Transmembrane protein 230 OS=Rattus norvegicus OX=10116 GN=Tmem230 PE=1 SV=1	1	2.01	22.3667	10.9333	0.00821225	0.0159748	2.04573	1.03262
Plod2	Q811A3	Procollagen-lysine,2-oxoglutarate 5-dioxygenase 2 OS=Rattus norvegicus OX=10116 GN=Plod2 PE=2 SV=1	2	4.06	214.567	49.5333	0.0185124	0.0251203	4.33176	2.11495
Prtfdc1	B2RYS6	Hypoxanthine phosphoribosyltransferase OS=Rattus norvegicus OX=10116 GN=Prtfdc1 PE=1 SV=1	1	2.27	17.1667	8.46667	0.0109139	0.0186083	2.02756	1.01974
	Q91ZP7	Metalloproteinase inhibitor 1 (Fragment) OS=Rattus norvegicus OX=10116 PE=2 SV=1	1	2.53	78	14.1	0.000911835	0.00571637	5.53191	2.46778
LOC100912026	M0R7P3	Urinary protein 3-like OS=Rattus norvegicus OX=10116 GN=LOC100912026 PE=1 SV=2	1	2.29	6.96667	39.1333	0.000605369	0.00492442	0.178024	-2.48986
Ncf2	R4I4V9	Neutrophil cytosolic factor 2 mutant isoform 2 OS=Rattus norvegicus OX=10116 GN=Ncf2 PE=2 SV=1	2	2.62	96.2667	32.0667	0.00154702	0.00701227	3.00208	1.58596
Fads6	D3ZEE9	Fatty acid desaturase 6 OS=Rattus norvegicus OX=10116 GN=Fads6 PE=1 SV=1	2	1.88	39.6	102.1	3.12519e-05	0.00215731	0.387855	-1.36641
Minar2	F7EQ04	Membrane integral NOTCH2-associated receptor 2 OS=Rattus norvegicus OX=10116 GN=Minar2 PE=3 SV=1	1	2.11	49.1667	114.833	0.0456484	0.0433158	0.428157	-1.22379
Cxcl9	Q8K4B1	C-X-C motif chemokine OS=Rattus norvegicus OX=10116 GN=Cxcl9 PE=2 SV=1	1	2.79	97.2	7.96667	0.0175356	0.024341	12.2008	3.60891
Mcm5	E9PTS4	DNA helicase OS=Rattus norvegicus OX=10116 GN=Mcm5 PE=1 SV=2	1	2.57	26.9667	12.9	0.00828572	0.0160419	2.09044	1.06381
Slc13a5	Q8CJ44	Solute carrier family 13 member 5 OS=Rattus norvegicus OX=10116 GN=Slc13a5 PE=2 SV=1	2	3.61	138.433	10.8333	0.0300577	0.0336254	12.7785	3.67564
Dhrs13	D3ZBC7	Dehydrogenase/reductase 13 OS=Rattus norvegicus OX=10116 GN=Dhrs13 PE=1 SV=3	2	3.63	152.767	51.3	1.65953e-05	0.00183089	2.97791	1.5743
Slc23a1	A0A0G2K595	Solute carrier family 23 member 1 OS=Rattus norvegicus OX=10116 GN=Slc23a1 PE=1 SV=1	2	2.28	46.7333	122.2	0.000483492	0.00447692	0.382433	-1.38672
Selenok	P59798	Selenoprotein K OS=Rattus norvegicus OX=10116 GN=Selenok PE=3 SV=2	1	2.38	36.6333	14.1333	4.35062e-05	0.00233915	2.59198	1.37406
Nbr1	Q501R9	Next to BRCA1 gene 1 protein OS=Rattus norvegicus OX=10116 GN=Nbr1 PE=1 SV=1	1	2.57	16.5667	5.86667	1.76577e-06	0.000750252	2.82386	1.49767
Pgpep1	Q76IC5	Pyroglutamyl-peptidase 1 OS=Rattus norvegicus OX=10116 GN=Pgpep1 PE=1 SV=1	1	2.4	65.5333	157.267	0.00784345	0.0156282	0.416702	-1.26291
Tnfaip3	M0R7V5	Ubiquitinyl hydrolase 1 OS=Rattus norvegicus OX=10116 GN=Tnfaip3 PE=1 SV=1	1	1.93	27.2667	6.23333	0.0021185	0.00797222	4.37433	2.12906
Slc2a1	P11167	Solute carrier family 2, facilitated glucose transporter member 1 OS=Rattus norvegicus OX=10116 GN=Slc2a1 PE=1 SV=1	1	2.19	38.4667	18.1333	0.047818	0.0446277	2.12132	1.08496
Colec10	D4A7F6	Collectin sub-family member 10 (C-type lectin) (Predicted) OS=Rattus norvegicus OX=10116 GN=Colec10 PE=1 SV=1	1	0	4.66667	17.6	0.00161018	0.00711613	0.265152	-1.91511
Elane	D4A488	Elastase 2, neutrophil (Predicted) OS=Rattus norvegicus OX=10116 GN=Elane PE=4 SV=1	1	1.7	19.3	5.43333	0.00253835	0.00872167	3.55215	1.82869
Insig2	Q80UA9	Insulin-induced gene 2 protein OS=Rattus norvegicus OX=10116 GN=Insig2 PE=2 SV=1	1	1.99	17.9	57.9	2.85114e-05	0.00211376	0.309154	-1.6936
Slc11a2	Q4QR92	Natural resistance-associated macrophage protein 2 OS=Rattus norvegicus OX=10116 GN=Slc11a2 PE=1 SV=1	1	2.09	24.2667	7.9	0.00535999	0.0129234	3.07173	1.61905
Cep76	G3V931	Centrosomal protein of 76 kDa OS=Rattus norvegicus OX=10116 GN=Cep76 PE=1 SV=1	1	2.2	117.267	26.5	0.000441276	0.00432608	4.42516	2.14573
Srebf1	P56720	Sterol regulatory element-binding protein 1 OS=Rattus norvegicus OX=10116 GN=Srebf1 PE=1 SV=3	2	1.82	25.1667	70.2333	0.00249876	0.00865641	0.358329	-1.48064
B3galt1	D3ZPD8	Hexosyltransferase OS=Rattus norvegicus OX=10116 GN=B3galt1 PE=1 SV=1	1	2.36	59.6333	27.6	0.000990813	0.00586488	2.16063	1.11145
Suco	A0A096MJ80	SUN domain-containing ossification factor OS=Rattus norvegicus OX=10116 GN=Suco PE=1 SV=1	1	2.21	16.0333	7.53333	0.00812127	0.0158909	2.12832	1.08971
Rexo4	B1WBN4	RNA exonuclease 4 OS=Rattus norvegicus OX=10116 GN=Rexo4 PE=1 SV=1	1	2.69	49.8667	24.2	0.0212149	0.0271074	2.06061	1.04307
Slc25a29	Q5HZE0	Mitochondrial basic amino acids transporter OS=Rattus norvegicus OX=10116 GN=Slc25a29 PE=2 SV=1	1	2.06	21.8333	5.66667	0.000203505	0.00364751	3.85294	1.94596
Defa	Q62715	Neutrophil antibiotic peptide NP-2 OS=Rattus norvegicus OX=10116 GN=Defa PE=1 SV=1	1	2.35	204.267	42.8	0.00321491	0.00980123	4.77259	2.25477
	D3ZJU3	Uncharacterized protein OS=Rattus norvegicus OX=10116 PE=1 SV=2	1	1.78	23.6667	8.13333	0.0314504	0.0345494	2.90984	1.54094
S1pr2	P47752	Sphingosine 1-phosphate receptor 2 OS=Rattus norvegicus OX=10116 GN=S1pr2 PE=1 SV=1	1	2.13	98.5	25.5667	0.0244473	0.0296141	3.85267	1.94586
Far1	A0A0H2UHL1	Fatty acyl-CoA reductase OS=Rattus norvegicus OX=10116 GN=Far1 PE=3 SV=1	1	1.84	25.1	9.93333	0.00269589	0.00898325	2.52685	1.33734
Lpl	Q06000	Lipoprotein lipase OS=Rattus norvegicus OX=10116 GN=Lpl PE=1 SV=1	1	2.07	76.1	23.4	0.0459304	0.0434875	3.25214	1.70139
Qsox2	D3ZP13	Sulfhydryl oxidase OS=Rattus norvegicus OX=10116 GN=Qsox2 PE=1 SV=1	1	2.11	149.167	74.5	0.000121138	0.00309709	2.00224	1.00161
Igf1	Q5RK13	Insulin-like growth factor I OS=Rattus norvegicus OX=10116 GN=Igf1 PE=2 SV=2	1	0	25.2333	65.1667	0.000696201	0.00520431	0.387212	-1.3688
Abcb9	Q9QYJ4	ABC-type oligopeptide transporter ABCB9 OS=Rattus norvegicus OX=10116 GN=Abcb9 PE=1 SV=1	1	1.92	100.2	38.3667	0.000114666	0.00304012	2.61164	1.38496
Zbtb16	Q5S3S9	Promyelocytic leukemia zinc finger protein OS=Rattus norvegicus OX=10116 GN=Zbtb16 PE=1 SV=1	1	1.96	25.5333	11.2667	0.000562099	0.00477297	2.26627	1.18032
Zfp277	M0RDU3	Zinc finger protein 277 OS=Rattus norvegicus OX=10116 GN=Zfp277 PE=4 SV=2	1	3.92	161.9	76.4333	0.00116703	0.00625698	2.11819	1.08283
Gnl2	Q4KLJ3	Nucleolar GTP-binding protein 2 OS=Rattus norvegicus OX=10116 GN=Gnl2 PE=1 SV=1	1	0	16.4	6.73333	0.00246639	0.00860226	2.43564	1.2843
	B3SVE5	Neuroprotective protein 8 OS=Rattus norvegicus OX=10116 PE=2 SV=1	1	2.07	74.3333	36.1667	0.000420375	0.00425515	2.0553	1.03935
Gca	D3ZYI0	Grancalcin OS=Rattus norvegicus OX=10116 GN=Gca PE=1 SV=2	1	1.87	65.9	25.9	0.00532827	0.0128848	2.5444	1.34733
Mid1ip1	A7BKC9	MID1 interacting G12-like protein OS=Rattus norvegicus OX=10116 GN=Mid1ip1 PE=1 SV=1	1	2.51	14.5333	99.7	0.000378473	0.00414884	0.145771	-2.77823
Tor3a	Q5M936	Torsin-3A OS=Rattus norvegicus OX=10116 GN=Tor3a PE=2 SV=1	1	1.78	23.1333	11.3	0.000192215	0.00359236	2.0472	1.03365
Slc2a5	B1WBQ4	Fructose transporter OS=Rattus norvegicus OX=10116 GN=Slc2a5 PE=2 SV=1	1	2.32	41.6333	116.6	0.0123099	0.0199092	0.357061	-1.48576
Frmd4b	F1LZB7	FERM domain-containing 4B OS=Rattus norvegicus OX=10116 GN=Frmd4b PE=1 SV=2	1	1.98	140.967	56.8	2.53144e-05	0.00205404	2.48181	1.31139
Smtnl2	D3ZUC1	Smoothelin-like 2 OS=Rattus norvegicus OX=10116 GN=Smtnl2 PE=1 SV=1	1	1.86	93	15	0.0010225	0.0059199	6.2	2.63227
Cyp2w1	A0A0G2KAI3	Cytochrome P450, family 2, subfamily w, polypeptide 1 OS=Rattus norvegicus OX=10116 GN=Cyp2w1 PE=3 SV=1	1	2.41	45.7	108.433	0.0444433	0.0425735	0.421457	-1.24654
Celsr3	O88278	Cadherin EGF LAG seven-pass G-type receptor 3 OS=Rattus norvegicus OX=10116 GN=Celsr3 PE=1 SV=1	1	0	37.6	80.9333	0.0322383	0.0350585	0.46458	-1.106
Ncf4	B2RZ98	Ncf4 protein OS=Rattus norvegicus OX=10116 GN=Ncf4 PE=1 SV=1	1	1.86	72.0333	30.0667	0.00564389	0.0132586	2.39579	1.2605
Mcm7	Q1PS21	DNA replication licensing factor MCM7 OS=Rattus norvegicus OX=10116 GN=Mcm7 PE=2 SV=1	1	1.9	42.1667	17.2333	0.0158233	0.0229094	2.44681	1.2909
Slc39a13	Q2M1K6	Zinc transporter ZIP13 OS=Rattus norvegicus OX=10116 GN=Slc39a13 PE=2 SV=1	1	0	6.93333	17.2333	0.0387475	0.039017	0.402321	-1.31358
Mcm6	A9CMB8	DNA helicase OS=Rattus norvegicus OX=10116 GN=Mcm6 PE=1 SV=1	1	0	40.0333	18.9667	0.0107144	0.0184107	2.11072	1.07774
C1qtnf1	A0A0G2JXS9	Complement C1q tumor necrosis factor-related protein 1 OS=Rattus norvegicus OX=10116 GN=C1qtnf1 PE=4 SV=1	1	2.03	120.533	49.7333	0.00446261	0.0117371	2.42359	1.27715
Mcm2	D3ZP96	DNA replication licensing factor MCM2 OS=Rattus norvegicus OX=10116 GN=Mcm2 PE=1 SV=2	1	1.84	37.2667	14.8667	0.0192365	0.0256757	2.50673	1.3258
Trmt6	D3ZVK3	tRNA (adenine(58)-N(1))-methyltransferase non-catalytic subunit TRM6 OS=Rattus norvegicus OX=10116 GN=Trmt6 PE=1 SV=1	1	2.25	84.2333	39.4	0.000749028	0.00534716	2.1379	1.0962
Ccdc36	M0R8J7	Coiled-coil domain containing 36 OS=Rattus norvegicus OX=10116 GN=Ccdc36 PE=4 SV=1	1	0	19.2667	45.3	0.00585863	0.0135009	0.425313	-1.2334
Ficd	Q6AY47	Protein adenylyltransferase FICD OS=Rattus norvegicus OX=10116 GN=Ficd PE=2 SV=1	1	0	24.4	12.1667	0.00406228	0.0111355	2.00548	1.00395
Nob1	Q6VEU1	RNA-binding protein NOB1 OS=Rattus norvegicus OX=10116 GN=Nob1 PE=2 SV=1	1	2	136.467	63.4	0.00052655	0.00464249	2.15247	1.10599
