# Supplementary material for: Liver proteomic analysis reveals the key proteins involved in host immune response to sepsis
Source: PeerJ. 2023 May 26;11:e15294. doi: 10.7717/peerj.15294 (PMC10226476; doi:10.7717/peerj.15294)
Supplement: Supplemental Information 2 [file peerj-11-15294-s002.xlsx]

## Sheet: Sheet1
Table S2: GO enrichment analysis of upregulated DEPs
Category	ID	Description	GeneRatio	BgRatio	FoldEnrichment	pvalue	p.adjust	genes	Count
CC	GO:0005615	extracellular space	40/141	1787/19411	3.08151	5.6e-11	1.11485e-07	Cfb/Fam3c/C1qtnf1/Alpl/Vcam1/Mpo/Il1r1/Np4/Itgam/Clu/Il1rn/Orm1/S100a9/Hp/Qsox2/Elane/Prg4/Lgals3bp/Lyz1/Agt/Fgg/A2m/Fga/Anxa1/Cnp/Fgb/Ctsg/Hpx/Lcn2/S100a8/Fabp5/Icam1/Lpl/Lbp/Saa4/Fgl1/Defa/Serpina10/Serping1/Cxcl9	40
CC	GO:0044421	extracellular region part	42/141	1994/19411	2.8997	1.1e-10	1.11485e-07	Cfb/Slc11a2/Fam3c/C1qtnf1/Plscr1/Alpl/Vcam1/Mpo/Il1r1/Np4/Itgam/Clu/Il1rn/Orm1/S100a9/Hp/Qsox2/Elane/Prg4/Lgals3bp/Lyz1/Agt/Fgg/A2m/Fga/Anxa1/Cnp/Fgb/Ctsg/Hpx/Lcn2/S100a8/Fabp5/Icam1/Lpl/Lbp/Saa4/Fgl1/Defa/Serpina10/Serping1/Cxcl9	42
CC	GO:0005576	extracellular region	45/141	2453/19411	2.52548	1.7e-09	1.14863e-06	Cfb/Slc11a2/Fam3c/C1qtnf1/Plscr1/Alpl/Vcam1/Mpo/Il1r1/Np4/Itgam/Clu/Il1rn/Orm1/S100a9/Hp/Qsox2/Elane/Prg4/Lgals3bp/Lyz1/Agt/Fgg/S100a4/A2m/Fga/Anxa1/Cnp/Fgb/Ctsg/Gzmb/Hpx/Lcn2/Sdc4/S100a8/Fabp5/Icam1/Lpl/Lbp/Saa4/Fgl1/Defa/Serpina10/Serping1/Cxcl9	45
CC	GO:0044444	cytoplasmic part	94/141	8591/19411	1.50631	6.2e-08	3.14185e-05	Suco/Far1/Ncf1/Abcb9/Selenok/Slc11a2/Akr1b8/Fam3c/LOC103689968/Plod2/Plscr1/Nbr1/Alpl/Vcam1/Mpo/Slc2a1/Np4/Dsc2/Steap4/Cep76/Map1lc3b2/Clu/S100a9/Slc13a5/Hp/Ncf2/Mthfd1l/Nceh1/Ncf4/Rpl22l1/Dhrs13/Cmpk2/Qsox2/B3galt1/Smtnl2/Trmt6/Gca/Elane/Nnmt/Myorg/Impdh2/Ifit1/Rnf213/Gbp5/Ybx3/Plin2/Oasl/Rbm3/Bysl/Nos1ap/Lyz1/Agt/Fgg/S100a4/S100a6/Fga/Hmox1/Anxa1/Pck1/Pkm/Cnp/Fgb/Cyp4b1/Ctsg/Gzmb/Mx1/Ptpn1/Hk2/…	94
CC	GO:0005737	cytoplasm	106/141	10973/19411	1.32987	3e-06	0.000675667	Suco/Far1/Ncf1/Abcb9/Selenok/Slc11a2/Akr1b8/Fam3c/LOC103689968/Plod2/Ubap2/Plscr1/Nbr1/Alpl/Vcam1/Mpo/Slc2a1/Np4/Dsc2/Steap4/Cep76/Map1lc3b2/Clu/S100a9/Slc13a5/Hp/Ncf2/Ctps1/Mthfd1l/Nceh1/Prtfdc1/Ncf4/Rpl22l1/Dhrs13/Cmpk2/Mt1m/Qsox2/Mcm2/B3galt1/Smtnl2/Trmt6/Gca/Elane/Nnmt/Myorg/Impdh2/Ifit1/Frmd4b/Rnf213/Gbp5/Ybx3/Plin2/Oasl/Rbm3/Tnfaip3/Bysl/Nos1ap/Lyz1/Agt/Fgg/S100a4/S100a6/Fga/Hmox1/Anxa1/Pck…	106
CC	GO:0012505	endomembrane system	50/141	3817/19411	1.80334	8e-06	0.00147418	Suco/Ncf1/Abcb9/Selenok/Slc11a2/Fam3c/LOC103689968/Plod2/Plscr1/Nbr1/Vcam1/Mpo/Np4/Steap4/Clu/Hp/Ncf2/Nceh1/Ncf4/Qsox2/B3galt1/Elane/Myorg/Gbp5/Nos1ap/Lyz1/Fgg/S100a6/Fga/Hmox1/Anxa1/Pck1/Pkm/Fgb/Cyp4b1/Ctsg/Gzmb/Mx1/Ptpn1/Hk2/Sqle/Rhob/RGD1309362/Ifit2/Pum3/Tmem230/Tor3a/Gbp2/Ficd/Synpo	50
CC	GO:0043227	membrane-bounded organelle	103/141	10857/19411	1.30604	1.9e-05	0.00320942	Suco/Far1/Ncf1/Abcb9/Selenok/Slc11a2/Akr1b8/Fam3c/LOC103689968/Plod2/Mcm5/Ubap2/Plscr1/Nbr1/Alpl/Vcam1/Mpo/Il1r1/Slc2a1/Np4/Dsc2/Itgam/Rcl1/Steap4/Map1lc3b2/Clu/Il1rn/S100a9/Slc13a5/Hp/Tsr1/Ncf2/Mcm6/Rexo4/Mthfd1l/Nceh1/Ncf4/Dhrs13/Cmpk2/Mt1m/Cebpz/Qsox2/Mcm2/B3galt1/Trmt6/Elane/Myorg/Impdh2/Rnf213/Gbp5/Ybx3/Plin2/Oasl/Rbm3/Tnfaip3/Bysl/Nos1ap/Lyz1/Agt/Fgg/S100a4/S100a6/Fga/Hmox1/Anxa1/Pck1/Pkm/C…	103
CC	GO:0005783	endoplasmic reticulum	28/141	1680/19411	2.29444	2.5e-05	0.00389808	Suco/Ncf1/Abcb9/Selenok/LOC103689968/Plod2/Vcam1/Clu/Hp/Nceh1/Myorg/Nos1ap/Lyz1/Fga/Hmox1/Pck1/Pkm/Fgb/Cyp4b1/Mx1/Ptpn1/Hk2/Sqle/RGD1309362/Ifit2/Pum3/Tor3a/Ficd	28
CC	GO:0005730	nucleolus	17/141	739/19411	3.16689	2.7e-05	0.00390921	Plscr1/Rcl1/Tsr1/Rexo4/Mcm2/Rnf213/Oasl/Bysl/Hmox1/Ddx21/Gnl2/Pum3/Mak16/Mnda/Ciapin1/Mcm7/Gnl3	17
CC	GO:0031982	vesicle	30/141	2051/19411	2.01365	0.00014	0.0157656	Abcb9/Slc11a2/Fam3c/Nbr1/Vcam1/Mpo/Slc2a1/Np4/Dsc2/Steap4/Clu/Il1rn/Ncf2/Ncf4/Elane/Gbp5/Lyz1/Fgg/Fga/Anxa1/Cnp/Fgb/Ctsg/Gzmb/Ptpn1/Lcn2/Rhob/Icam1/Tmem230/Gbp2	30
CC	GO:0043231	intracellular membrane-bounded organelle	95/141	10092/19411	1.29591	0.00014	0.0157656	Suco/Far1/Ncf1/Abcb9/Selenok/Slc11a2/Akr1b8/Fam3c/LOC103689968/Plod2/Mcm5/Ubap2/Plscr1/Nbr1/Alpl/Vcam1/Mpo/Il1r1/Slc2a1/Np4/Itgam/Rcl1/Steap4/Map1lc3b2/Clu/S100a9/Slc13a5/Hp/Tsr1/Mcm6/Rexo4/Mthfd1l/Nceh1/Dhrs13/Cmpk2/Mt1m/Cebpz/Qsox2/Mcm2/B3galt1/Trmt6/Myorg/Impdh2/Rnf213/Gbp5/Ybx3/Plin2/Oasl/Rbm3/Tnfaip3/Bysl/Nos1ap/Lyz1/Agt/S100a4/S100a6/Fga/Hmox1/Anxa1/Pck1/Pkm/Cnp/Fgb/Cyp4b1/Ctsg/Gzmb/Mx1/Ptp…	95
CC	GO:0043229	intracellular organelle	109/141	12201/19411	1.22987	0.00016	0.0167448	Suco/Far1/Ncf1/Abcb9/Selenok/Slc11a2/Akr1b8/Fam3c/LOC103689968/Plod2/Mcm5/Ubap2/Plscr1/Nbr1/Alpl/Vcam1/Mpo/Il1r1/Slc2a1/Np4/Dsc2/Itgam/Rcl1/Steap4/Cep76/Map1lc3b2/Clu/S100a9/Slc13a5/Hp/Tsr1/Ncf2/Mcm6/Rexo4/Mthfd1l/Nceh1/Ncf4/Rpl22l1/Dhrs13/Cmpk2/Mt1m/Cebpz/Qsox2/Mcm2/B3galt1/Smtnl2/Trmt6/Elane/Map7d1/Myorg/Impdh2/Frmd4b/Rnf213/Gbp5/Ybx3/Plin2/Oasl/Rbm3/Tnfaip3/Bysl/Nos1ap/Lyz1/Agt/Fgg/S100a4/S100…	109
CC	GO:0005791	rough endoplasmic reticulum	6/141	113/19411	7.30973	0.00018	0.0167448	Suco/Ncf1/Plod2/Lyz1/Fga/Pkm	6
CC	GO:0005829	cytosol	43/141	3481/19411	1.70056	0.00019	0.0167448	Ncf1/Akr1b8/Plscr1/Nbr1/Slc2a1/Map1lc3b2/Clu/S100a9/Slc13a5/Ncf2/Mthfd1l/Ncf4/Gca/Nnmt/Impdh2/Ifit1/Rnf213/Ybx3/Plin2/Oasl/Nos1ap/S100a6/Hmox1/Pck1/Ctsg/Ptpn1/Hk2/Lcn2/Asns/S100a8/Stat3/Fabp5/Rhob/Ddx21/Ifit2/Saa4/Gbp2/Zbtb16/Ifit3/Mcm7/Sec14l2/Niban1/Synpo	43
CC	GO:0005622	intracellular	120/141	13997/19411	1.18025	0.00019	0.0167448	Suco/Far1/Ncf1/Abcb9/Selenok/Slc11a2/Akr1b8/Fam3c/LOC103689968/Plod2/Mcm5/Ubap2/Plscr1/Nbr1/Alpl/Vcam1/Mpo/Il1r1/Slc2a1/Np4/Dsc2/Itgam/Rcl1/Steap4/Cep76/Map1lc3b2/Clu/S100a9/Slc13a5/Hp/Tsr1/Ncf2/Mcm6/Rexo4/Ctps1/Mthfd1l/Nceh1/Prtfdc1/Ncf4/Rpl22l1/Dhrs13/Cmpk2/Mt1m/Cebpz/Qsox2/Mcm2/B3galt1/Smtnl2/Trmt6/Gca/Elane/Nnmt/Map7d1/Myorg/Impdh2/Ifit1/Frmd4b/Rnf213/Gbp5/Ybx3/Plin2/Oasl/Rbm3/Tnfaip3/Bysl/No…	120
CC	GO:0044424	intracellular part	120/141	13997/19411	1.18025	0.00019	0.0167448	Suco/Far1/Ncf1/Abcb9/Selenok/Slc11a2/Akr1b8/Fam3c/LOC103689968/Plod2/Mcm5/Ubap2/Plscr1/Nbr1/Alpl/Vcam1/Mpo/Il1r1/Slc2a1/Np4/Dsc2/Itgam/Rcl1/Steap4/Cep76/Map1lc3b2/Clu/S100a9/Slc13a5/Hp/Tsr1/Ncf2/Mcm6/Rexo4/Ctps1/Mthfd1l/Nceh1/Prtfdc1/Ncf4/Rpl22l1/Dhrs13/Cmpk2/Mt1m/Cebpz/Qsox2/Mcm2/B3galt1/Smtnl2/Trmt6/Gca/Elane/Nnmt/Map7d1/Myorg/Impdh2/Ifit1/Frmd4b/Rnf213/Gbp5/Ybx3/Plin2/Oasl/Rbm3/Tnfaip3/Bysl/No…	120
CC	GO:0043226	organelle	111/141	12559/19411	1.21674	0.0002	0.0168917	Suco/Far1/Ncf1/Abcb9/Selenok/Slc11a2/Akr1b8/Fam3c/LOC103689968/Plod2/Mcm5/Ubap2/Plscr1/Nbr1/Alpl/Vcam1/Mpo/Il1r1/Slc2a1/Np4/Dsc2/Itgam/Rcl1/Steap4/Cep76/Map1lc3b2/Clu/Il1rn/S100a9/Slc13a5/Hp/Tsr1/Ncf2/Mcm6/Rexo4/Mthfd1l/Nceh1/Ncf4/Rpl22l1/Dhrs13/Cmpk2/Mt1m/Cebpz/Qsox2/Mcm2/B3galt1/Smtnl2/Trmt6/Elane/Map7d1/Myorg/Impdh2/Frmd4b/Rnf213/Gbp5/Ybx3/Plin2/Oasl/Rbm3/Tnfaip3/Bysl/Nos1ap/Lyz1/Agt/Fgg/S100a…	111
CC	GO:0009986	cell surface	19/141	1066/19411	2.45372	0.00026	0.0210808	Slc11a2/Vcam1/Il1r1/Itgam/Clu/Slc4a4/Elane/Fgg/Fga/Anxa1/Fgb/Ctsg/Sdc4/Sirpa/Icam1/Lpl/Lbp/Abcg2/Cxcl9	19
CC	GO:0031410	cytoplasmic vesicle	27/141	1899/19411	1.95735	0.0005	0.037537	Abcb9/Slc11a2/Fam3c/Nbr1/Vcam1/Mpo/Np4/Dsc2/Steap4/Clu/Ncf2/Ncf4/Elane/Gbp5/Lyz1/Fgg/Fga/Anxa1/Cnp/Fgb/Ctsg/Gzmb/Ptpn1/Lcn2/Rhob/Tmem230/Gbp2	27
CC	GO:0097708	intracellular vesicle	27/141	1908/19411	1.94811	0.00054	0.0390921	Abcb9/Slc11a2/Fam3c/Nbr1/Vcam1/Mpo/Np4/Dsc2/Steap4/Clu/Ncf2/Ncf4/Elane/Gbp5/Lyz1/Fgg/Fga/Anxa1/Cnp/Fgb/Ctsg/Gzmb/Ptpn1/Lcn2/Rhob/Tmem230/Gbp2	27
MF	GO:0042802	identical protein binding	38/133	2081/17560	2.41093	1.4e-07	0.0006552	Abcb9/Pkm/C1qtnf1/Slc2a1/Slc4a4/Hp/Mcm6/Ctps1/Mthfd1l/Prtfdc1/Gca/Impdh2/Gbp5/Tnfaip3/Lyz1/Fgg/S100a4/S100a6/A2m/Hmox1/Anxa1/Mx1/Tgm1/Lcn2/Sdc4/Asns/Stat3/Fabp5/Selenok/Lpl/Ddx21/Gbp2/Zbtb16/Np4/Defa/Ficd/Ifit3/Abcg2	38
MF	GO:0004003	ATP-dependent DNA helicase activity	5/133	27/17560	24.45	1.6e-06	0.001872	Mcm5/Mcm6/Mcm2/Anxa1/Mcm7	5
MF	GO:0008026	ATP-dependent helicase activity	5/133	27/17560	24.45	1.6e-06	0.001872	Mcm5/Mcm6/Mcm2/Anxa1/Mcm7	5
MF	GO:0070035	purine NTP-dependent helicase activity	5/133	27/17560	24.45	1.6e-06	0.001872	Mcm5/Mcm6/Mcm2/Anxa1/Mcm7	5
MF	GO:0043167	ion binding	66/133	5605/17560	1.55468	1.5e-05	0.01287	Ncf1/Abcb9/Slc11a2/Akr1b8/Plod2/Pkm/Mcm5/Plscr1/Nbr1/Alpl/Mpo/Dsc2/LOC103689968/Itgam/S100a9/Tsr1/Mcm6/Ctps1/Mthfd1l/Nceh1/Prtfdc1/Ncf4/Mt1m/Mcm2/Gca/Elane/Impdh2/Rnf213/Gbp5/Tnfaip3/Fgg/S100a4/S100a6/Fga/Hmox1/Anxa1/Pck1/Cyp4b1/Ctsg/Mx1/Hpx/Ptpn1/Tgm1/Hk2/Lcn2/Asns/S100a8/Sqle/Fabp5/Rhob/Lpl/Tes/Ddx21/Gnl2/Tubb6/RGD1309362/Steap4/Tor3a/Gbp2/Ciapin1/Serpina10/Ficd/Mcm7/Nob1/Abcg2/Gnl3	66
MF	GO:0017111	nucleoside-triphosphatase activity	19/133	833/17560	3.01149	1.7e-05	0.01287	Abcb9/Mcm5/Alpl/Clu/Tsr1/Mcm6/Mcm2/Rnf213/Gbp5/Anxa1/Mx1/Rhob/Ddx21/Tubb6/RGD1309362/Tor3a/Gbp2/Mcm7/Abcg2	19
MF	GO:0043168	anion binding	41/133	2866/17560	1.88878	2.3e-05	0.01287	Ncf1/Abcb9/Akr1b8/Plod2/Pkm/Mcm5/Mpo/Itgam/Tsr1/Mcm6/Ctps1/Mthfd1l/Nceh1/Ncf4/Mcm2/Elane/Gbp5/Anxa1/Pck1/Ctsg/Mx1/Hk2/Lcn2/Asns/S100a8/Sqle/Fabp5/Rhob/Lpl/Ddx21/Gnl2/Tubb6/RGD1309362/Steap4/Tor3a/Gbp2/Serpina10/Ficd/Mcm7/Abcg2/Gnl3	41
MF	GO:0003697	single-stranded DNA binding	7/133	119/17560	7.76648	3.4e-05	0.01287	Mcm5/Mcm6/Rexo4/Mcm2/Ybx3/Anxa1/Mcm7	7
MF	GO:0016787	hydrolase activity	38/133	2623/17560	1.91275	3.9e-05	0.01287	Cfb/Abcb9/Mcm5/Plscr1/Alpl/Il1r1/Rcl1/Clu/Hp/Tsr1/Gzmb/Mcm6/Rexo4/Nceh1/Mcm2/Elane/Myorg/Rnf213/Gbp5/Tnfaip3/Lyz1/Hmox1/Anxa1/Cnp/Ctsg/Mx1/Ptpn1/Rhob/Lpl/Ddx21/Tubb6/RGD1309362/Tor3a/Gbp2/Ficd/Mcm7/Nob1/Abcg2	38
MF	GO:0016462	pyrophosphatase activity	19/133	893/17560	2.80915	4.3e-05	0.01287	Abcb9/Mcm5/Alpl/Clu/Tsr1/Mcm6/Mcm2/Rnf213/Gbp5/Anxa1/Mx1/Rhob/Ddx21/Tubb6/RGD1309362/Tor3a/Gbp2/Mcm7/Abcg2	19
MF	GO:0016817	hydrolase activity, acting on acid anhydrides	19/133	895/17560	2.80287	4.4e-05	0.01287	Abcb9/Mcm5/Alpl/Clu/Tsr1/Mcm6/Mcm2/Rnf213/Gbp5/Anxa1/Mx1/Rhob/Ddx21/Tubb6/RGD1309362/Tor3a/Gbp2/Mcm7/Abcg2	19
MF	GO:0016818	hydrolase activity, acting on acid anhydrides, in phosphorus-containing anhydrides	19/133	895/17560	2.80287	4.4e-05	0.01287	Abcb9/Mcm5/Alpl/Clu/Tsr1/Mcm6/Mcm2/Rnf213/Gbp5/Anxa1/Mx1/Rhob/Ddx21/Tubb6/RGD1309362/Tor3a/Gbp2/Mcm7/Abcg2	19
MF	GO:0048306	calcium-dependent protein binding	6/133	93/17560	8.51807	7.5e-05	0.0206471	S100a9/S100a4/S100a6/A2m/Anxa1/S100a8	6
MF	GO:0003824	catalytic activity	66/133	5939/17560	1.46725	0.00012	0.0312	Far1/Ncf1/Cfb/Abcb9/Akr1b8/Plod2/Pkm/Mcm5/Plscr1/Alpl/Mpo/Il1r1/Rcl1/Clu/Hp/Tsr1/Gzmb/Ncf2/Mcm6/Rexo4/Ctps1/Mthfd1l/Nceh1/Prtfdc1/Dhrs13/Cmpk2/Qsox2/Mcm2/B3galt1/Elane/Nnmt/Myorg/Impdh2/Herc6/Rnf213/Gbp5/Oasl/Tnfaip3/Lyz1/Hmox1/Anxa1/Pck1/Cnp/Cyp4b1/Ctsg/Mx1/Ptpn1/Tgm1/Hk2/Vcam1/Asns/Sqle/Rhob/Lpl/Ddx21/Tubb6/RGD1309362/Steap4/Sec14l2/Tor3a/Gbp2/Ciapin1/Ficd/Mcm7/Nob1/Abcg2	66
MF	GO:0002020	protease binding	7/133	147/17560	6.28715	0.00013	0.0320211	Il1r1/Elane/Tnfaip3/Nos1ap/A2m/Ctsg/Lcn2	7
MF	GO:0016887	ATPase activity	12/133	446/17560	3.55238	0.00015	0.0351	Abcb9/Mcm5/Alpl/Clu/Mcm6/Mcm2/Rnf213/Anxa1/Ddx21/Tor3a/Mcm7/Abcg2	12
MF	GO:0008094	DNA-dependent ATPase activity	5/133	69/17560	9.5674	0.00018	0.0401143	Mcm5/Mcm6/Mcm2/Anxa1/Mcm7	5
MF	GO:0003678	DNA helicase activity	5/133	70/17560	9.43072	0.00019	0.0404182	Mcm5/Mcm6/Mcm2/Anxa1/Mcm7	5
BP	GO:0006950	response to stress	79/141	4025/18830	2.62115	2.3e-19	3.73589e-15	Ncf1/Cfb/Selenok/Slc11a2/Pkm/C1qtnf1/Mcm5/Plscr1/Nbr1/Vcam1/Mpo/Il1r1/Slc2a1/Np4/Dsc2/Itgam/Map1lc3b2/Clu/Il1rn/Orm1/S100a9/Hp/Gzmb/Ncf2/Mcm6/Rexo4/Mt1m/Mcm2/Plod2/Elane/Ifit1/Gbp5/Ybx3/Oasl/Tnfaip3/Zfp277/Nos1ap/Lyz1/Agt/Fgg/A2m/Fga/Hmox1/Anxa1/Pck1/Fgb/Ctsg/Mx1/Hpx/Ptpn1/Ifrd1/Hk2/Lcn2/Sdc4/Asns/S100a8/Stat3/Fabp5/Rhob/Sirpa/Icam1/Lpl/Ddx21/Lbp/RGD1309362/Ifit2/Saa4/Gbp2/Mnda/Defa/Serpina10/Fic…	79
BP	GO:0051707	response to other organism	43/141	1228/18830	4.67629	3.4e-18	2.05745e-14	Ncf1/Cfb/Selenok/Plscr1/Alpl/Vcam1/Mpo/Np4/Clu/Il1rn/Orm1/S100a9/Hp/Ncf2/Cmpk2/Elane/Herc6/Ifit1/Gbp5/Oasl/Tnfaip3/Bysl/Lyz1/Fga/Pck1/Cnp/Fgb/Ctsg/Mx1/Lcn2/S100a8/Sirpa/Icam1/Lpl/Ddx21/Lbp/Ifit2/Gbp2/Mnda/Defa/Ifit3/Abcg2/Cxcl9	43
BP	GO:0043207	response to external biotic stimulus	43/141	1232/18830	4.66111	3.8e-18	2.05745e-14	Ncf1/Cfb/Selenok/Plscr1/Alpl/Vcam1/Mpo/Np4/Clu/Il1rn/Orm1/S100a9/Hp/Ncf2/Cmpk2/Elane/Herc6/Ifit1/Gbp5/Oasl/Tnfaip3/Bysl/Lyz1/Fga/Pck1/Cnp/Fgb/Ctsg/Mx1/Lcn2/S100a8/Sirpa/Icam1/Lpl/Ddx21/Lbp/Ifit2/Gbp2/Mnda/Defa/Ifit3/Abcg2/Cxcl9	43
BP	GO:0009617	response to bacterium	37/141	916/18830	5.39433	1.4e-17	5.19776e-14	Ncf1/Cfb/Plscr1/Alpl/Vcam1/Mpo/Np4/Il1rn/Orm1/S100a9/Hp/Ncf2/Cmpk2/Elane/Herc6/Ifit1/Gbp5/Tnfaip3/Bysl/Lyz1/Fga/Pck1/Cnp/Fgb/Ctsg/Lcn2/S100a8/Sirpa/Icam1/Lpl/Lbp/Gbp2/Mnda/Defa/Ifit3/Abcg2/Cxcl9	37
BP	GO:0009607	response to biotic stimulus	43/141	1280/18830	4.48631	1.6e-17	5.19776e-14	Ncf1/Cfb/Selenok/Plscr1/Alpl/Vcam1/Mpo/Np4/Clu/Il1rn/Orm1/S100a9/Hp/Ncf2/Cmpk2/Elane/Herc6/Ifit1/Gbp5/Oasl/Tnfaip3/Bysl/Lyz1/Fga/Pck1/Cnp/Fgb/Ctsg/Mx1/Lcn2/S100a8/Sirpa/Icam1/Lpl/Ddx21/Lbp/Ifit2/Gbp2/Mnda/Defa/Ifit3/Abcg2/Cxcl9	43
BP	GO:0032496	response to lipopolysaccharide	27/141	464/18830	7.771	9.1e-17	2.46352e-13	Cfb/Plscr1/Alpl/Vcam1/Mpo/Np4/Il1rn/Orm1/S100a9/Hp/Ncf2/Cmpk2/Elane/Tnfaip3/Bysl/Pck1/Cnp/Ctsg/Lcn2/S100a8/Sirpa/Icam1/Lbp/Gbp2/Defa/Abcg2/Cxcl9	27
BP	GO:0002237	response to molecule of bacterial origin	27/141	481/18830	7.49635	2.2e-16	5.10494e-13	Cfb/Plscr1/Alpl/Vcam1/Mpo/Np4/Il1rn/Orm1/S100a9/Hp/Ncf2/Cmpk2/Elane/Tnfaip3/Bysl/Pck1/Cnp/Ctsg/Lcn2/S100a8/Sirpa/Icam1/Lbp/Gbp2/Defa/Abcg2/Cxcl9	27
BP	GO:0006952	defense response	47/141	1687/18830	3.72061	4.8e-16	9.7458e-13	Ncf1/Cfb/Selenok/Plscr1/Vcam1/Mpo/Il1r1/Np4/Itgam/Clu/Il1rn/Orm1/S100a9/Hp/Gzmb/Elane/Ifit1/Gbp5/Oasl/Tnfaip3/Lyz1/Agt/A2m/Fga/Hmox1/Anxa1/Fgb/Ctsg/Mx1/Hpx/Lcn2/S100a8/Stat3/Sirpa/Icam1/Lpl/Ddx21/Lbp/RGD1309362/Ifit2/Saa4/Gbp2/Mnda/Defa/Ifit3/Serping1/Cxcl9	47
BP	GO:0009605	response to external stimulus	59/141	2844/18830	2.77047	1.5e-14	2.70717e-11	Ncf1/Cfb/Selenok/Pkm/C1qtnf1/Plscr1/Alpl/Vcam1/Mpo/Il1r1/Slc2a1/Np4/Dsc2/Itgam/Map1lc3b2/Clu/Il1rn/Orm1/S100a9/Hp/Ncf2/Cmpk2/Elane/Herc6/Ifit1/Gbp5/Oasl/Tnfaip3/Bysl/Lyz1/Agt/Fgg/A2m/Fga/Hmox1/Anxa1/Pck1/Cnp/Fgb/Ctsg/Mx1/Lcn2/Asns/S100a8/Stat3/Sirpa/Icam1/Lpl/Ddx21/Lbp/Ifit2/Gbp2/Mnda/Defa/Ifit3/Serping1/Abcg2/Cxcl9/Slc38a3	59
BP	GO:0070887	cellular response to chemical stimulus	62/141	3240/18830	2.55551	9.5e-14	1.54308e-10	Ncf1/Slc11a2/Akr1b8/Pkm/Plscr1/Alpl/Vcam1/Mpo/Il1r1/Np4/Itgam/Clu/Il1rn/Orm1/S100a9/Slc13a5/Hp/Ncf2/Nceh1/Cmpk2/Mt1m/Mcm2/Plod2/Impdh2/Ifit1/Gbp5/Ybx3/Oasl/Tnfaip3/Bysl/Zfp277/Agt/Fgg/Fga/Hmox1/Anxa1/Pck1/Fgb/Ctsg/Mx1/Hpx/Ptpn1/Hk2/Lcn2/Asns/S100a8/Stat3/Rhob/Sirpa/Icam1/Lpl/Lbp/RGD1309362/Ifit2/Gbp2/Mnda/Defa/Ficd/Ifit3/Mcm7/Abcg2/Cxcl9	62
BP	GO:0002526	acute inflammatory response	15/141	152/18830	13.1789	5.1e-13	7.53085e-10	Plscr1/Vcam1/Il1rn/Orm1/Hp/Elane/A2m/Fga/Lcn2/S100a8/Stat3/Icam1/Lbp/Saa4/Serping1	15
BP	GO:0010033	response to organic substance	64/141	3599/18830	2.37481	9.2e-13	1.2453e-09	Cfb/Slc11a2/Akr1b8/Pkm/Plscr1/Alpl/Vcam1/Mpo/Il1r1/Slc2a1/Np4/Clu/Il1rn/Orm1/S100a9/Hp/Ncf2/Cmpk2/Mcm2/Plod2/Elane/Nnmt/Impdh2/Ifit1/Gbp5/Ybx3/Plin2/Oasl/Tnfaip3/Bysl/Agt/Fgg/A2m/Fga/Anxa1/Pck1/Cnp/Fgb/Ctsg/Mx1/Hpx/Ptpn1/Hk2/Lcn2/Asns/S100a8/Sqle/Stat3/Sirpa/Icam1/Lpl/Ddx21/Lbp/RGD1309362/Ifit2/Fgl1/Gbp2/Mnda/Defa/Ficd/Ifit3/Mcm7/Abcg2/Cxcl9	64
BP	GO:0006954	inflammatory response	28/141	769/18830	4.86254	2.8e-12	3.49849e-09	Ncf1/Plscr1/Vcam1/Il1r1/Itgam/Clu/Il1rn/Orm1/S100a9/Hp/Elane/Gbp5/Tnfaip3/Agt/A2m/Fga/Hmox1/Anxa1/Lcn2/S100a8/Stat3/Sirpa/Icam1/Lpl/Lbp/Saa4/Serping1/Cxcl9	28
BP	GO:0006953	acute-phase response	10/141	54/18830	24.7308	7.3e-12	8.46956e-09	Plscr1/Il1rn/Orm1/Hp/A2m/Fga/Lcn2/Stat3/Lbp/Saa4	10
BP	GO:0071345	cellular response to cytokine stimulus	29/141	889/18830	4.3564	1.6e-11	1.6243e-08	Slc11a2/Plscr1/Vcam1/Il1r1/Il1rn/Mcm2/Impdh2/Ifit1/Gbp5/Ybx3/Oasl/Bysl/Fgg/Fga/Pck1/Fgb/Mx1/Hpx/Hk2/Lcn2/Stat3/Sirpa/Icam1/RGD1309362/Ifit2/Gbp2/Mnda/Ifit3/Cxcl9	29
BP	GO:0002376	immune system process	53/141	2767/18830	2.55798	1.6e-11	1.6243e-08	Ncf1/Cfb/Abcb9/Selenok/Slc11a2/Plscr1/Vcam1/Mpo/Il1r1/Np4/Itgam/Clu/Il1rn/Orm1/S100a9/Hp/Gzmb/Ctps1/Elane/Impdh2/Herc6/Ifit1/Prg4/Gbp5/Oasl/Tnfaip3/A2m/Fga/Hmox1/Anxa1/Pck1/Fgb/Ctsg/Mx1/Hpx/Lcn2/Sdc4/S100a8/Stat3/Sirpa/Icam1/Ddx21/Lbp/Ifit2/Fgl1/Gbp2/Zbtb16/Mnda/Ciapin1/Defa/Ifit3/Serping1/Cxcl9	53
BP	GO:0051704	multi-organism process	51/141	2600/18830	2.61956	2e-11	1.91094e-08	Ncf1/Cfb/Selenok/Plscr1/Alpl/Vcam1/Mpo/Il1r1/Slc2a1/Np4/Clu/Il1rn/Orm1/S100a9/Hp/Ncf2/Cmpk2/Elane/Herc6/Ifit1/Gbp5/Ybx3/Oasl/Tnfaip3/Bysl/Lyz1/Agt/Fga/Pck1/Cnp/Fgb/Ctsg/Mx1/Lcn2/S100a8/Stat3/Sirpa/Icam1/Lpl/Ddx21/Lbp/Ifit2/Gbp2/Zbtb16/Mnda/Defa/Serpina10/Ifit3/Abcg2/Cxcl9/Slc38a3	51
BP	GO:0033993	response to lipid	34/141	1298/18830	3.49813	8.2e-11	7.39959e-08	Cfb/Plscr1/Alpl/Vcam1/Mpo/Np4/Clu/Il1rn/Orm1/S100a9/Hp/Ncf2/Cmpk2/Elane/Tnfaip3/Bysl/Agt/A2m/Fga/Anxa1/Pck1/Cnp/Ctsg/Lcn2/S100a8/Stat3/Sirpa/Icam1/Lpl/Lbp/Gbp2/Defa/Abcg2/Cxcl9	34
BP	GO:0034097	response to cytokine	30/141	1026/18830	3.90486	9.7e-11	8.29248e-08	Slc11a2/Plscr1/Vcam1/Il1r1/Il1rn/Mcm2/Impdh2/Ifit1/Gbp5/Ybx3/Oasl/Bysl/Fgg/Fga/Anxa1/Pck1/Fgb/Mx1/Hpx/Hk2/Lcn2/Stat3/Sirpa/Icam1/RGD1309362/Ifit2/Gbp2/Mnda/Ifit3/Cxcl9	30
BP	GO:0002252	immune effector process	27/141	851/18830	4.23707	1.6e-10	1.29944e-07	Ncf1/Cfb/Selenok/Plscr1/Mpo/Il1r1/Itgam/Clu/Gzmb/Elane/Ifit1/Oasl/A2m/Hmox1/Anxa1/Pck1/Ctsg/Mx1/Hpx/Stat3/Icam1/Ddx21/Lbp/Ifit2/Ifit3/Serping1/Cxcl9	27
BP	GO:1901700	response to oxygen-containing compound	44/141	2154/18830	2.72796	2.4e-10	1.8458e-07	Ncf1/Cfb/Akr1b8/Pkm/Plscr1/Alpl/Vcam1/Mpo/Il1r1/Slc2a1/Np4/Clu/Il1rn/Orm1/S100a9/Hp/Ncf2/Cmpk2/Elane/Tnfaip3/Bysl/Zfp277/Agt/A2m/Fga/Hmox1/Anxa1/Pck1/Cnp/Ctsg/Ptpn1/Lcn2/Asns/S100a8/Stat3/Rhob/Sirpa/Icam1/Lpl/Lbp/Gbp2/Defa/Abcg2/Cxcl9	44
BP	GO:0071310	cellular response to organic substance	49/141	2602/18830	2.5149	2.5e-10	1.8458e-07	Slc11a2/Pkm/Plscr1/Alpl/Vcam1/Il1r1/Np4/Clu/Il1rn/Orm1/Ncf2/Cmpk2/Mcm2/Plod2/Impdh2/Ifit1/Gbp5/Ybx3/Oasl/Tnfaip3/Bysl/Agt/Fgg/Fga/Anxa1/Pck1/Fgb/Ctsg/Mx1/Hpx/Ptpn1/Hk2/Lcn2/Asns/Stat3/Sirpa/Icam1/Lpl/Lbp/RGD1309362/Ifit2/Gbp2/Mnda/Defa/Ficd/Ifit3/Mcm7/Abcg2/Cxcl9	49
BP	GO:0006955	immune response	37/141	1709/18830	2.89128	2.1e-09	1.48306e-06	Ncf1/Cfb/Plscr1/Il1r1/Np4/Itgam/Il1rn/Orm1/S100a9/Gzmb/Elane/Prg4/Gbp5/Oasl/Tnfaip3/A2m/Fga/Hmox1/Anxa1/Pck1/Fgb/Ctsg/Mx1/Hpx/Lcn2/S100a8/Stat3/Sirpa/Icam1/Ddx21/Lbp/Fgl1/Gbp2/Mnda/Defa/Serping1/Cxcl9	37
BP	GO:0098542	defense response to other organism	22/141	651/18830	4.51308	3.2e-09	2.16573e-06	Ncf1/Selenok/Plscr1/Mpo/Np4/Hp/Elane/Ifit1/Oasl/Lyz1/Fga/Fgb/Ctsg/Mx1/Lcn2/Ddx21/Lbp/Ifit2/Gbp2/Defa/Ifit3/Cxcl9	22
BP	GO:0010035	response to inorganic substance	24/141	786/18830	4.07774	4.2e-09	2.72882e-06	Ncf1/Slc11a2/Plscr1/Vcam1/Mpo/Il1r1/Clu/S100a9/Slc13a5/Hp/Mt1m/Tnfaip3/Zfp277/Fgg/Fga/Hmox1/Anxa1/Fgb/Lcn2/S100a8/Rhob/Sirpa/Icam1/Abcg2	24
BP	GO:0045087	innate immune response	25/141	861/18830	3.87765	5.2e-09	3.2486e-06	Ncf1/Cfb/Plscr1/Np4/S100a9/Gzmb/Gbp5/Oasl/Tnfaip3/A2m/Fga/Anxa1/Fgb/Mx1/Hpx/Lcn2/S100a8/Sirpa/Icam1/Ddx21/Lbp/Gbp2/Mnda/Defa/Serping1	25
BP	GO:1901701	cellular response to oxygen-containing compound	31/141	1389/18830	2.98051	3e-08	1.80478e-05	Ncf1/Akr1b8/Pkm/Plscr1/Vcam1/Mpo/Il1r1/Np4/Clu/Il1rn/Orm1/Cmpk2/Tnfaip3/Bysl/Zfp277/Agt/Anxa1/Pck1/Ctsg/Ptpn1/Lcn2/Stat3/Rhob/Sirpa/Icam1/Lpl/Lbp/Gbp2/Defa/Abcg2/Cxcl9	31
BP	GO:0080134	regulation of response to stress	32/141	1489/18830	2.87003	4.1e-08	2.37844e-05	Ncf1/Selenok/C1qtnf1/Plscr1/Nbr1/Il1r1/Itgam/Clu/Il1rn/S100a9/Gbp5/Ybx3/Oasl/Tnfaip3/Zfp277/Agt/Fgg/A2m/Fga/Anxa1/Fgb/Ctsg/Hpx/Ptpn1/S100a8/Stat3/Sirpa/Lpl/Lbp/Mnda/Ficd/Serping1	32
BP	GO:1902042	negative regulation of extrinsic apoptotic signaling pathway via death domain receptors	6/141	28/18830	28.617	5.2e-08	2.81545e-05	Tnfaip3/Fgg/Fga/Hmox1/Fgb/Icam1	6
BP	GO:0070555	response to interleukin-1	11/141	167/18830	8.79645	5.2e-08	2.81545e-05	Il1r1/Il1rn/Bysl/Fgg/Anxa1/Pck1/Fgb/Lcn2/Sirpa/Icam1/Gbp2	11
BP	GO:0071347	cellular response to interleukin-1	10/141	133/18830	10.0411	6.2e-08	3.2486e-05	Il1r1/Il1rn/Bysl/Fgg/Pck1/Fgb/Lcn2/Sirpa/Icam1/Gbp2	10
BP	GO:0071222	cellular response to lipopolysaccharide	13/141	256/18830	6.78164	6.8e-08	3.45164e-05	Plscr1/Np4/Cmpk2/Tnfaip3/Bysl/Ctsg/Lcn2/Sirpa/Icam1/Lbp/Gbp2/Defa/Cxcl9	13
BP	GO:0072593	reactive oxygen species metabolic process	14/141	307/18830	6.09005	7.9e-08	3.86966e-05	Ncf1/Mpo/Itgam/Clu/Hp/Ncf2/Ncf4/Nos1ap/Agt/Hk2/Lcn2/Stat3/Sirpa/Icam1	14
BP	GO:0045730	respiratory burst	6/141	30/18830	26.7092	8.1e-08	3.86966e-05	Ncf1/Selenok/Mpo/Ncf2/Ncf4/Lbp	6
BP	GO:0002544	chronic inflammatory response	6/141	31/18830	25.8476	1e-07	4.64086e-05	Vcam1/Il1rn/Orm1/S100a9/Tnfaip3/S100a8	6
BP	GO:0071219	cellular response to molecule of bacterial origin	13/141	266/18830	6.52669	1.1e-07	4.96314e-05	Plscr1/Np4/Cmpk2/Tnfaip3/Bysl/Ctsg/Lcn2/Sirpa/Icam1/Lbp/Gbp2/Defa/Cxcl9	13
BP	GO:0042221	response to chemical	74/141	5905/18830	1.67357	1.4e-07	6.146e-05	Ncf1/Cfb/Slc11a2/Akr1b8/Pkm/Plscr1/Alpl/Vcam1/Mpo/Il1r1/Slc2a1/Np4/Itgam/Clu/Il1rn/Orm1/S100a9/Slc13a5/Hp/Ncf2/Nceh1/Cmpk2/Mt1m/Mcm2/Plod2/Elane/Nnmt/Impdh2/Ifit1/Gbp5/Ybx3/Plin2/Oasl/Tnfaip3/Bysl/Zfp277/Agt/Fgg/A2m/Fga/Hmox1/Anxa1/Pck1/Cnp/Fgb/Ctsg/Mx1/Hpx/Ptpn1/Hk2/Lcn2/Asns/S100a8/Sqle/Stat3/Rhob/Sirpa/Icam1/Lpl/Ddx21/Lbp/RGD1309362/Ifit2/Slc25a29/Fgl1/Gbp2/Mnda/Defa/Ficd/Ifit3/Mcm7/Abcg2/Cxcl…	74
BP	GO:0033554	cellular response to stress	36/141	1962/18830	2.45039	2.6e-07	0.000111136	Ncf1/Selenok/Slc11a2/Mcm5/Plscr1/Nbr1/Mpo/Slc2a1/Dsc2/Itgam/Map1lc3b2/Clu/Il1rn/Mcm6/Rexo4/Mcm2/Ybx3/Tnfaip3/Zfp277/Nos1ap/Agt/Hmox1/Anxa1/Pck1/Ptpn1/Hk2/Lcn2/Asns/Rhob/Sirpa/Icam1/Mnda/Ficd/Mcm7/Niban1/Slc38a3	36
BP	GO:0071216	cellular response to biotic stimulus	13/141	294/18830	5.9051	3.3e-07	0.000137441	Plscr1/Np4/Cmpk2/Tnfaip3/Bysl/Ctsg/Lcn2/Sirpa/Icam1/Lbp/Gbp2/Defa/Cxcl9	13
BP	GO:0010038	response to metal ion	17/141	518/18830	4.38279	3.5e-07	0.00013866	Ncf1/Slc11a2/Plscr1/Vcam1/Clu/S100a9/Slc13a5/Hp/Mt1m/Fgg/Fga/Hmox1/Fgb/Lcn2/S100a8/Icam1/Abcg2	17
BP	GO:0022407	regulation of cell-cell adhesion	16/141	459/18830	4.6552	3.5e-07	0.00013866	Selenok/C1qtnf1/Vcam1/Il1rn/Elane/Fgg/Fga/Anxa1/Pck1/Fgb/Ctsg/Sdc4/Sirpa/Icam1/Fgl1/Zbtb16	16
BP	GO:0034113	heterotypic cell-cell adhesion	7/141	62/18830	15.0778	4e-07	0.000154695	Vcam1/Dsc2/Il1rn/Fgg/Fga/Fgb/Sirpa	7
BP	GO:0032101	regulation of response to external stimulus	22/141	865/18830	3.39655	4.8e-07	0.000181317	Ncf1/Selenok/C1qtnf1/Il1r1/S100a9/Gbp5/Oasl/Tnfaip3/Agt/Fgg/A2m/Fga/Anxa1/Fgb/Ctsg/S100a8/Stat3/Sirpa/Lpl/Lbp/Serping1/Cxcl9	22
BP	GO:0097237	cellular response to toxic substance	13/141	317/18830	5.47665	7.8e-07	0.000287944	Akr1b8/Mpo/S100a9/Hp/Tnfaip3/Zfp277/Hmox1/Anxa1/Lcn2/S100a8/Rhob/Sirpa/Abcg2	13
BP	GO:0007159	leukocyte cell-cell adhesion	14/141	375/18830	4.98572	8.9e-07	0.000314492	Selenok/Vcam1/Itgam/S100a9/Elane/Anxa1/Pck1/Ctsg/Sdc4/S100a8/Sirpa/Icam1/Fgl1/Zbtb16	14
BP	GO:0009636	response to toxic substance	20/141	755/18830	3.53765	9e-07	0.000314492	Akr1b8/Vcam1/Mpo/S100a9/Hp/Mt1m/Tnfaip3/Zfp277/Fga/Hmox1/Anxa1/Cnp/Lcn2/Asns/S100a8/Stat3/Rhob/Sirpa/Icam1/Abcg2	20
BP	GO:1903409	reactive oxygen species biosynthetic process	9/141	137/18830	8.7731	9.1e-07	0.000314492	Ncf1/Mpo/Clu/Nos1ap/Agt/Lcn2/Stat3/Sirpa/Icam1	9
BP	GO:0044283	small molecule biosynthetic process	20/141	758/18830	3.52364	9.6e-07	0.00032486	Fam3c/Pkm/Mpo/Slc4a4/Ctps1/Mthfd1l/Prtfdc1/Plod2/Nnmt/Impdh2/Agt/Anxa1/Pck1/Cnp/Hk2/Asns/Stat3/Fabp5/Lpl/Sec14l2	20
BP	GO:0001775	cell activation	25/141	1151/18830	2.90065	1.3e-06	0.000430937	Selenok/C1qtnf1/Plscr1/Vcam1/Itgam/Clu/Ctps1/Impdh2/Tnfaip3/Agt/Fgg/Fga/Hmox1/Anxa1/Pck1/Fgb/Ctsg/Sdc4/Stat3/Sirpa/Icam1/Lbp/Fgl1/Zbtb16/Mnda	25
BP	GO:1902041	regulation of extrinsic apoptotic signaling pathway via death domain receptors	6/141	49/18830	16.3526	1.7e-06	0.000531021	Tnfaip3/Fgg/Fga/Hmox1/Fgb/Icam1	6
BP	GO:0022409	positive regulation of cell-cell adhesion	12/141	288/18830	5.56442	1.8e-06	0.00055061	Selenok/Vcam1/Elane/Fgg/Fga/Anxa1/Pck1/Fgb/Ctsg/Sirpa/Icam1/Zbtb16	12
BP	GO:0031347	regulation of defense response	19/141	721/18830	3.51925	1.9e-06	0.00055061	Ncf1/Selenok/Plscr1/Il1r1/S100a9/Gbp5/Oasl/Tnfaip3/Agt/A2m/Anxa1/Hpx/S100a8/Stat3/Sirpa/Lpl/Lbp/Mnda/Serping1	19
BP	GO:0035455	response to interferon-alpha	5/141	28/18830	23.8475	1.9e-06	0.00055061	Plscr1/Ifit1/Ifit2/Mnda/Ifit3	5
BP	GO:0051240	positive regulation of multicellular organismal process	35/141	2040/18830	2.29123	1.9e-06	0.00055061	Suco/Selenok/Pkm/C1qtnf1/Alpl/Il1r1/Itgam/Clu/Orm1/S100a9/Smtnl2/Elane/Gbp5/Ybx3/Oasl/Tnfaip3/Agt/Fgg/Fga/Hmox1/Anxa1/Pck1/Fgb/Ctsg/Hk2/Lcn2/Stat3/Fabp5/Rhob/Icam1/Lpl/Ddx21/Lbp/Zbtb16/Mnda	35
BP	GO:0071396	cellular response to lipid	19/141	724/18830	3.50466	2e-06	0.00055061	Plscr1/Np4/Clu/Orm1/Cmpk2/Tnfaip3/Bysl/Anxa1/Pck1/Ctsg/Lcn2/Sirpa/Icam1/Lpl/Lbp/Gbp2/Defa/Abcg2/Cxcl9	19
BP	GO:0032612	interleukin-1 production	8/141	112/18830	9.53901	2e-06	0.00055061	Orm1/Gbp5/Tnfaip3/Anxa1/Stat3/Sirpa/Lpl/Mnda	8
BP	GO:0032652	regulation of interleukin-1 production	8/141	112/18830	9.53901	2e-06	0.00055061	Orm1/Gbp5/Tnfaip3/Anxa1/Stat3/Sirpa/Lpl/Mnda	8
BP	GO:0009611	response to wounding	18/141	658/18830	3.65324	2.1e-06	0.000559185	Pkm/C1qtnf1/Clu/S100a9/Fgg/A2m/Fga/Hmox1/Anxa1/Fgb/Ctsg/Ifrd1/Sdc4/S100a8/Fabp5/Saa4/Serpina10/Serping1	18
BP	GO:0002684	positive regulation of immune system process	24/141	1101/18830	2.91109	2.1e-06	0.000559185	Cfb/Selenok/Plscr1/Vcam1/Il1r1/Itgam/Elane/Gbp5/Oasl/Tnfaip3/A2m/Hmox1/Anxa1/Pck1/Ctsg/Hpx/Stat3/Sirpa/Icam1/Ddx21/Lbp/Zbtb16/Mnda/Serping1	24
BP	GO:0035456	response to interferon-beta	6/141	51/18830	15.7113	2.2e-06	0.000576365	Plscr1/Ifit1/RGD1309362/Gbp2/Mnda/Ifit3	6
BP	GO:0017144	drug metabolic process	20/141	804/18830	3.32204	2.4e-06	0.000609113	Ncf1/Akr1b8/Pkm/Alpl/Mpo/Itgam/Clu/Slc4a4/Hp/Mthfd1l/Nnmt/Nos1ap/Agt/Pck1/Cyp4b1/Hk2/Asns/Stat3/Sirpa/Icam1	20
BP	GO:0050727	regulation of inflammatory response	14/141	408/18830	4.58246	2.4e-06	0.000609113	Ncf1/Il1r1/S100a9/Gbp5/Tnfaip3/Agt/A2m/Anxa1/S100a8/Stat3/Sirpa/Lpl/Lbp/Serping1	14
BP	GO:0050832	defense response to fungus	6/141	53/18830	15.1184	2.7e-06	0.000674709	Ncf1/Mpo/Np4/Elane/Ctsg/Defa	6
BP	GO:0097190	apoptotic signaling pathway	17/141	612/18830	3.70961	3.4e-06	0.00081215	Selenok/Plscr1/Itgam/Clu/S100a9/Ybx3/Tnfaip3/Agt/Fgg/Fga/Hmox1/Fgb/Ptpn1/Lcn2/S100a8/Icam1/Ppp2r1b	17
BP	GO:0070741	response to interleukin-6	6/141	55/18830	14.5687	3.4e-06	0.00081215	Fgg/Fga/Pck1/Lcn2/Stat3/Icam1	6
BP	GO:0046677	response to antibiotic	16/141	546/18830	3.91344	3.4e-06	0.00081215	Alpl/Vcam1/Clu/S100a9/Hp/Tnfaip3/Zfp277/Fga/Hmox1/Anxa1/Lcn2/S100a8/Stat3/Rhob/Sirpa/Icam1	16
BP	GO:2001233	regulation of apoptotic signaling pathway	14/141	424/18830	4.40954	3.7e-06	0.000871001	Plscr1/Clu/S100a9/Ybx3/Tnfaip3/Agt/Fgg/Fga/Hmox1/Fgb/Ptpn1/S100a8/Icam1/Ppp2r1b	14
BP	GO:0019730	antimicrobial humoral response	8/141	122/18830	8.75712	3.8e-06	0.000879829	Np4/S100a9/Elane/Fga/Fgb/Ctsg/Defa/Cxcl9	8
BP	GO:0042060	wound healing	15/141	487/18830	4.11333	3.9e-06	0.000879829	Pkm/C1qtnf1/S100a9/Fgg/Fga/Hmox1/Anxa1/Fgb/Ctsg/Ifrd1/Sdc4/S100a8/Saa4/Serpina10/Serping1	15
BP	GO:0008219	cell death	35/141	2108/18830	2.21732	4.1e-06	0.00089995	Ncf1/Selenok/Pkm/Plscr1/Itgam/Clu/Il1rn/S100a9/Hp/Gzmb/Ncf2/Mcm2/Ybx3/Tnfaip3/Nos1ap/Agt/Fgg/Fga/Hmox1/Anxa1/Fgb/Ptpn1/Hk2/Lcn2/Asns/S100a8/Stat3/Rhob/Icam1/Ppp2r1b/Ifit2/Zbtb16/Mnda/Ciapin1/Ifit3	35
BP	GO:0001889	liver development	11/141	259/18830	5.67184	4.1e-06	0.00089995	Pkm/Hp/Tnfaip3/Fga/Hmox1/Anxa1/Pck1/Asns/Lbp/Fgl1/Serpina10	11
BP	GO:1904036	negative regulation of epithelial cell apoptotic process	6/141	57/18830	14.0575	4.2e-06	0.000909608	Tnfaip3/Fgg/Fga/Hmox1/Fgb/Icam1	6
BP	GO:0030193	regulation of blood coagulation	7/141	88/18830	10.623	4.4e-06	0.000928171	C1qtnf1/S100a9/Fgg/Fga/Fgb/Ctsg/Serping1	7
BP	GO:0002523	leukocyte migration involved in inflammatory response	5/141	33/18830	20.2343	4.4e-06	0.000928171	Itgam/S100a9/Elane/S100a8/Lbp	5
BP	GO:0006959	humoral immune response	12/141	315/18830	5.08747	4.5e-06	0.000937096	Cfb/Np4/S100a9/Elane/A2m/Fga/Fgb/Ctsg/Hpx/Defa/Serping1/Cxcl9	12
BP	GO:0061008	hepaticobiliary system development	11/141	262/18830	5.6069	4.6e-06	0.000945795	Pkm/Hp/Tnfaip3/Fga/Hmox1/Anxa1/Pck1/Asns/Lbp/Fgl1/Serpina10	11
BP	GO:1900046	regulation of hemostasis	7/141	90/18830	10.3869	5.1e-06	0.00103004	C1qtnf1/S100a9/Fgg/Fga/Fgb/Ctsg/Serping1	7
BP	GO:0031640	killing of cells of other organism	6/141	59/18830	13.581	5.2e-06	0.00103004	Ncf1/Np4/Elane/Lyz1/Ctsg/Defa	6
BP	GO:0044364	disruption of cells of other organism	6/141	59/18830	13.581	5.2e-06	0.00103004	Ncf1/Np4/Elane/Lyz1/Ctsg/Defa	6
BP	GO:2000377	regulation of reactive oxygen species metabolic process	10/141	218/18830	6.12597	5.8e-06	0.00111435	Itgam/Clu/Hp/Nos1ap/Agt/Hk2/Lcn2/Stat3/Sirpa/Icam1	10
BP	GO:0050818	regulation of coagulation	7/141	92/18830	10.1611	5.9e-06	0.00111435	C1qtnf1/S100a9/Fgg/Fga/Fgb/Ctsg/Serping1	7
BP	GO:2000352	negative regulation of endothelial cell apoptotic process	5/141	35/18830	19.078	5.9e-06	0.00111435	Tnfaip3/Fgg/Fga/Fgb/Icam1	5
BP	GO:0031667	response to nutrient levels	19/141	781/18830	3.24888	5.9e-06	0.00111435	Pkm/Alpl/Vcam1/Mpo/Slc2a1/Dsc2/Map1lc3b2/Il1rn/Orm1/Hp/A2m/Hmox1/Pck1/Lcn2/Asns/Icam1/Lpl/Abcg2/Slc38a3	19
BP	GO:0050896	response to stimulus	101/141	10037/18830	1.34384	6.1e-06	0.00112452	Ncf1/Cfb/Selenok/Slc11a2/Akr1b8/Pkm/C1qtnf1/Mcm5/Plscr1/Nbr1/Alpl/Vcam1/Mpo/Il1r1/Slc2a1/Np4/Dsc2/Itgam/Map1lc3b2/Clu/Il1rn/Orm1/S100a9/Slc13a5/Hp/Synpo/Gzmb/Ncf2/Mcm6/Rexo4/Nceh1/Cmpk2/Mt1m/Mcm2/Plod2/Elane/Nnmt/Myorg/Impdh2/Herc6/Ifit1/Prg4/Rnf213/Gbp5/Ybx3/Plin2/Oasl/Tnfaip3/Bysl/Zfp277/Nos1ap/Lyz1/Agt/Fgg/S100a4/A2m/Fga/Hmox1/Anxa1/Pck1/Cnp/Fgb/Ctsg/Mx1/Hpx/Ptpn1/Ifrd1/Hk2/Lcn2/Sdc4/S1pr2/Asn…	101
BP	GO:0007596	blood coagulation	9/141	173/18830	6.94748	6.3e-06	0.00112452	C1qtnf1/S100a9/Fgg/Fga/Fgb/Ctsg/Saa4/Serpina10/Serping1	9
BP	GO:0002682	regulation of immune system process	28/141	1511/18830	2.47471	6.3e-06	0.00112452	Ncf1/Cfb/Selenok/Plscr1/Vcam1/Il1r1/Itgam/Orm1/Elane/Gbp5/Oasl/Tnfaip3/A2m/Hmox1/Anxa1/Pck1/Ctsg/Hpx/Sdc4/Stat3/Sirpa/Icam1/Ddx21/Lbp/Fgl1/Zbtb16/Mnda/Serping1	28
BP	GO:0032611	interleukin-1 beta production	7/141	93/18830	10.0519	6.3e-06	0.00112452	Orm1/Gbp5/Tnfaip3/Stat3/Sirpa/Lpl/Mnda	7
BP	GO:0032651	regulation of interleukin-1 beta production	7/141	93/18830	10.0519	6.3e-06	0.00112452	Orm1/Gbp5/Tnfaip3/Stat3/Sirpa/Lpl/Mnda	7
BP	GO:0098609	cell-cell adhesion	20/141	863/18830	3.09493	6.8e-06	0.00118766	Selenok/C1qtnf1/Vcam1/Dsc2/Itgam/Il1rn/S100a9/Elane/Fgg/Fga/Anxa1/Pck1/Fgb/Ctsg/Sdc4/S100a8/Sirpa/Icam1/Fgl1/Zbtb16	20
BP	GO:0050900	leukocyte migration	13/141	386/18830	4.49767	6.8e-06	0.00118766	Selenok/Vcam1/Il1r1/Itgam/S100a9/Elane/Anxa1/Ctsg/S100a8/Sirpa/Icam1/Lbp/Cxcl9	13
BP	GO:0007599	hemostasis	9/141	176/18830	6.82906	7.2e-06	0.00124414	C1qtnf1/S100a9/Fgg/Fga/Fgb/Ctsg/Saa4/Serpina10/Serping1	9
BP	GO:0042742	defense response to bacterium	13/141	392/18830	4.42882	8.1e-06	0.00138493	Ncf1/Mpo/Np4/Hp/Elane/Lyz1/Fga/Fgb/Ctsg/Lcn2/Lbp/Gbp2/Defa	13
BP	GO:0050817	coagulation	9/141	179/18830	6.71461	8.3e-06	0.00140434	C1qtnf1/S100a9/Fgg/Fga/Fgb/Ctsg/Saa4/Serpina10/Serping1	9
BP	GO:0051239	regulation of multicellular organismal process	47/141	3389/18830	1.85207	8.4e-06	0.00140661	Suco/Ncf1/Selenok/Pkm/C1qtnf1/Nbr1/Alpl/Il1r1/Dsc2/Itgam/Clu/Il1rn/Orm1/S100a9/Smtnl2/Elane/Prg4/Gbp5/Ybx3/Oasl/Tnfaip3/Nos1ap/Agt/Fgg/Fga/Hmox1/Anxa1/Pck1/Fgb/Ctsg/Ifrd1/Hk2/Lcn2/Sdc4/S1pr2/Stat3/Fabp5/Rhob/Sirpa/Icam1/Lpl/Ddx21/Lbp/Zbtb16/Mnda/Serping1/Abcg2	47
BP	GO:0051186	cofactor metabolic process	16/141	594/18830	3.5972	9.9e-06	0.0016243	Far1/Ncf1/Slc11a2/Akr1b8/Pkm/Alpl/Mpo/Slc4a4/Hp/Mthfd1l/Nnmt/Hmox1/Hpx/Hk2/Stat3/Ciapin1	16
BP	GO:0035458	cellular response to interferon-beta	5/141	39/18830	17.1213	1e-05	0.0016243	Ifit1/RGD1309362/Gbp2/Mnda/Ifit3	5
BP	GO:0009991	response to extracellular stimulus	19/141	812/18830	3.12485	1e-05	0.0016243	Pkm/Alpl/Vcam1/Mpo/Slc2a1/Dsc2/Map1lc3b2/Il1rn/Orm1/Hp/A2m/Hmox1/Pck1/Lcn2/Asns/Icam1/Lpl/Abcg2/Slc38a3	19
BP	GO:0042493	response to drug	23/141	1133/18830	2.711	1.1e-05	0.0017517	Vcam1/Il1r1/S100a9/Slc13a5/Hp/Ncf2/Tnfaip3/Zfp277/Agt/A2m/Fga/Hmox1/Anxa1/Pck1/Lcn2/S100a8/Stat3/Rhob/Sirpa/Icam1/Slc25a29/Abcg2/Slc38a3	23
BP	GO:0012501	programmed cell death	32/141	1927/18830	2.21768	1.2e-05	0.00189239	Ncf1/Selenok/Pkm/Plscr1/Itgam/Clu/Il1rn/S100a9/Gzmb/Ncf2/Mcm2/Ybx3/Tnfaip3/Agt/Fgg/Fga/Hmox1/Anxa1/Fgb/Ptpn1/Hk2/Lcn2/Asns/S100a8/Rhob/Icam1/Ppp2r1b/Ifit2/Zbtb16/Mnda/Ciapin1/Ifit3	32
BP	GO:0009620	response to fungus	6/141	69/18830	11.6127	1.3e-05	0.00199207	Ncf1/Mpo/Np4/Elane/Ctsg/Defa	6
BP	GO:0019731	antibacterial humoral response	6/141	69/18830	11.6127	1.3e-05	0.00199207	Np4/Elane/Fga/Fgb/Ctsg/Defa	6
BP	GO:0050776	regulation of immune response	20/141	904/18830	2.95456	1.3e-05	0.00199207	Ncf1/Cfb/Plscr1/Il1r1/Itgam/Elane/Gbp5/Oasl/Tnfaip3/A2m/Hmox1/Anxa1/Pck1/Ctsg/Hpx/Ddx21/Lbp/Fgl1/Mnda/Serping1	20
BP	GO:0001817	regulation of cytokine production	18/141	756/18830	3.17967	1.4e-05	0.00212525	Selenok/Il1r1/Clu/Orm1/Elane/Prg4/Gbp5/Oasl/Tnfaip3/Agt/Hmox1/Anxa1/Stat3/Sirpa/Lpl/Ddx21/Lbp/Mnda	18
BP	GO:0006801	superoxide metabolic process	6/141	71/18830	11.2856	1.5e-05	0.00225597	Ncf1/Mpo/Itgam/Ncf2/Ncf4/Agt	6
BP	GO:0001816	cytokine production	18/141	761/18830	3.15878	1.6e-05	0.00236262	Selenok/Il1r1/Clu/Orm1/Elane/Prg4/Gbp5/Oasl/Tnfaip3/Agt/Hmox1/Anxa1/Stat3/Sirpa/Lpl/Ddx21/Lbp/Mnda	18
BP	GO:0010941	regulation of cell death	30/141	1774/18830	2.25839	1.7e-05	0.00248767	Plscr1/Itgam/Clu/Il1rn/S100a9/Hp/Gzmb/Ncf2/Ybx3/Tnfaip3/Nos1ap/Agt/Fgg/Fga/Hmox1/Anxa1/Fgb/Ptpn1/Lcn2/Asns/S100a8/Stat3/Rhob/Icam1/Ppp2r1b/Ifit2/Zbtb16/Mnda/Ciapin1/Ifit3	30
BP	GO:0042554	superoxide anion generation	5/141	44/18830	15.1757	1.9e-05	0.00273112	Ncf1/Itgam/Ncf2/Ncf4/Agt	5
BP	GO:0006915	apoptotic process	31/141	1879/18830	2.20326	1.9e-05	0.00273112	Ncf1/Selenok/Plscr1/Itgam/Clu/Il1rn/S100a9/Gzmb/Ncf2/Mcm2/Ybx3/Tnfaip3/Agt/Fgg/Fga/Hmox1/Anxa1/Fgb/Ptpn1/Hk2/Lcn2/Asns/S100a8/Rhob/Icam1/Ppp2r1b/Ifit2/Zbtb16/Mnda/Ciapin1/Ifit3	31
BP	GO:0000302	response to reactive oxygen species	11/141	307/18830	4.78504	2e-05	0.00284965	Ncf1/Mpo/Il1r1/Hp/Tnfaip3/Zfp277/Hmox1/Anxa1/Lcn2/Rhob/Sirpa	11
BP	GO:0009628	response to abiotic stimulus	26/141	1437/18830	2.41628	2.2e-05	0.00310736	Slc11a2/Pkm/Vcam1/Mpo/Il1r1/Slc2a1/Clu/Hp/Synpo/Ncf2/Plod2/Elane/Ybx3/Agt/Fga/Hmox1/Anxa1/Pck1/Hk2/Lcn2/Asns/Rhob/Icam1/Lpl/Rbm3/Slc38a3	26
BP	GO:0045123	cellular extravasation	6/141	76/18830	10.5431	2.3e-05	0.0031394	Vcam1/Il1r1/Itgam/Elane/Sirpa/Icam1	6
BP	GO:1903426	regulation of reactive oxygen species biosynthetic process	7/141	113/18830	8.27277	2.3e-05	0.0031394	Clu/Nos1ap/Agt/Lcn2/Stat3/Sirpa/Icam1	7
BP	GO:0097530	granulocyte migration	8/141	156/18830	6.84852	2.3e-05	0.0031394	Il1r1/Itgam/S100a9/Anxa1/S100a8/Sirpa/Lbp/Cxcl9	8
BP	GO:0030195	negative regulation of blood coagulation	5/141	46/18830	14.5159	2.3e-05	0.0031394	C1qtnf1/Fgg/Fga/Fgb/Serping1	5
BP	GO:0016999	antibiotic metabolic process	8/141	157/18830	6.8049	2.4e-05	0.0032486	Ncf1/Akr1b8/Mpo/Hp/Mthfd1l/Pck1/Cyp4b1/Stat3	8
BP	GO:0002697	regulation of immune effector process	13/141	436/18830	3.98188	2.5e-05	0.00335599	Ncf1/Selenok/Il1r1/Itgam/Oasl/A2m/Hmox1/Anxa1/Pck1/Hpx/Ddx21/Lbp/Serping1	13
BP	GO:1900047	negative regulation of hemostasis	5/141	47/18830	14.207	2.6e-05	0.00346162	C1qtnf1/Fgg/Fga/Fgb/Serping1	5
BP	GO:0031100	animal organ regeneration	8/141	160/18830	6.6773	2.8e-05	0.00360956	Pkm/Orm1/Hp/Nnmt/Ybx3/Fga/Hmox1/Serpina10	8
BP	GO:2001236	regulation of extrinsic apoptotic signaling pathway	8/141	160/18830	6.6773	2.8e-05	0.00360956	Tnfaip3/Agt/Fgg/Fga/Hmox1/Fgb/Icam1/Ppp2r1b	8
BP	GO:0001819	positive regulation of cytokine production	14/141	507/18830	3.68766	2.8e-05	0.00360956	Selenok/Il1r1/Clu/Orm1/Elane/Gbp5/Oasl/Agt/Anxa1/Stat3/Lpl/Ddx21/Lbp/Mnda	14
BP	GO:0008625	extrinsic apoptotic signaling pathway via death domain receptors	6/141	79/18830	10.1427	2.8e-05	0.00360956	Tnfaip3/Fgg/Fga/Hmox1/Fgb/Icam1	6
BP	GO:0050819	negative regulation of coagulation	5/141	48/18830	13.9111	2.9e-05	0.00365153	C1qtnf1/Fgg/Fga/Fgb/Serping1	5
BP	GO:0071354	cellular response to interleukin-6	5/141	48/18830	13.9111	2.9e-05	0.00365153	Fgg/Fga/Lcn2/Stat3/Icam1	5
BP	GO:0044281	small molecule metabolic process	32/141	2016/18830	2.11978	2.9e-05	0.00365153	Far1/Ncf1/Akr1b8/Fam3c/Pkm/C1qtnf1/Alpl/Mpo/Slc4a4/Il1rn/Ctps1/Mthfd1l/Nceh1/Prtfdc1/Dhrs13/Cmpk2/Plod2/Nnmt/Impdh2/Agt/Anxa1/Pck1/Cnp/Hk2/Asns/Sqle/Stat3/Fabp5/Lpl/Fgl1/Abcg2/Sec14l2	32
BP	GO:0031099	regeneration	11/141	320/18830	4.59065	3e-05	0.00369159	Pkm/Orm1/Hp/Nnmt/Ybx3/Nos1ap/Fga/Hmox1/Anxa1/Ifrd1/Serpina10	11
BP	GO:0032635	interleukin-6 production	8/141	162/18830	6.59487	3e-05	0.00369159	Selenok/Orm1/Prg4/Tnfaip3/Stat3/Sirpa/Lpl/Lbp	8
BP	GO:0032675	regulation of interleukin-6 production	8/141	162/18830	6.59487	3e-05	0.00369159	Selenok/Orm1/Prg4/Tnfaip3/Stat3/Sirpa/Lpl/Lbp	8
BP	GO:0050865	regulation of cell activation	17/141	725/18830	3.13143	3.1e-05	0.00375771	Selenok/C1qtnf1/Plscr1/Vcam1/Itgam/Tnfaip3/Fgg/Hmox1/Anxa1/Pck1/Ctsg/Sdc4/Sirpa/Lbp/Fgl1/Zbtb16/Mnda	17
BP	GO:0048584	positive regulation of response to stimulus	36/141	2414/18830	1.99157	3.1e-05	0.00375771	Ncf1/Cfb/C1qtnf1/Plscr1/Il1r1/Itgam/Clu/Il1rn/S100a9/Elane/Myorg/Gbp5/Oasl/Tnfaip3/Agt/Fgg/S100a4/A2m/Fga/Anxa1/Pck1/Fgb/Ctsg/Hpx/Ptpn1/S100a8/Stat3/Fabp5/Icam1/Lpl/Ddx21/Lbp/Ppp2r1b/Mnda/Serping1/Cxcl9	36
BP	GO:0050778	positive regulation of immune response	17/141	727/18830	3.12281	3.2e-05	0.00385019	Cfb/Plscr1/Il1r1/Itgam/Elane/Gbp5/Oasl/Tnfaip3/A2m/Anxa1/Pck1/Ctsg/Hpx/Ddx21/Lbp/Mnda/Serping1	17
BP	GO:0009615	response to virus	11/141	325/18830	4.52002	3.4e-05	0.0040019	Selenok/Plscr1/Clu/Ifit1/Oasl/Mx1/Lcn2/Ddx21/Ifit2/Ifit3/Cxcl9	11
BP	GO:0061041	regulation of wound healing	8/141	165/18830	6.47496	3.5e-05	0.00406075	C1qtnf1/S100a9/Fgg/Fga/Anxa1/Fgb/Ctsg/Serping1	8
BP	GO:0050830	defense response to Gram-positive bacterium	7/141	121/18830	7.72581	3.5e-05	0.00406075	Ncf1/Np4/Lyz1/Ctsg/Lbp/Gbp2/Defa	7
BP	GO:0034109	homotypic cell-cell adhesion	6/141	83/18830	9.65393	3.7e-05	0.00426235	C1qtnf1/Dsc2/Fgg/Fga/Fgb/Ctsg	6
BP	GO:0031668	cellular response to extracellular stimulus	11/141	330/18830	4.45154	3.9e-05	0.00446111	Vcam1/Slc2a1/Dsc2/Map1lc3b2/Hmox1/Pck1/Lcn2/Asns/Icam1/Lpl/Slc38a3	11
BP	GO:1903037	regulation of leukocyte cell-cell adhesion	11/141	332/18830	4.42472	4.2e-05	0.00470487	Selenok/Vcam1/Elane/Anxa1/Pck1/Ctsg/Sdc4/Sirpa/Icam1/Fgl1/Zbtb16	11
BP	GO:0010942	positive regulation of cell death	17/141	747/18830	3.0392	4.4e-05	0.00489515	Plscr1/Itgam/Clu/S100a9/Hp/Gzmb/Ncf2/Agt/Hmox1/Anxa1/Lcn2/S100a8/Rhob/Ppp2r1b/Ifit2/Zbtb16/Mnda	17
BP	GO:0043068	positive regulation of programmed cell death	16/141	673/18830	3.17494	4.5e-05	0.00497235	Plscr1/Itgam/Clu/S100a9/Gzmb/Ncf2/Agt/Hmox1/Anxa1/Lcn2/S100a8/Rhob/Ppp2r1b/Ifit2/Zbtb16/Mnda	16
BP	GO:0050866	negative regulation of cell activation	9/141	223/18830	5.38975	4.7e-05	0.00515825	C1qtnf1/Tnfaip3/Fgg/Hmox1/Anxa1/Ctsg/Sdc4/Fgl1/Mnda	9
BP	GO:0043067	regulation of programmed cell death	27/141	1597/18830	2.25782	4.8e-05	0.00523264	Plscr1/Itgam/Clu/Il1rn/S100a9/Gzmb/Ncf2/Ybx3/Tnfaip3/Agt/Fgg/Fga/Hmox1/Anxa1/Fgb/Ptpn1/Lcn2/Asns/S100a8/Rhob/Icam1/Ppp2r1b/Ifit2/Zbtb16/Mnda/Ciapin1/Ifit3	27
BP	GO:0045907	positive regulation of vasoconstriction	5/141	54/18830	12.3654	5.2e-05	0.00563091	Smtnl2/Fgg/Fga/Fgb/Icam1	5
BP	GO:0045785	positive regulation of cell adhesion	13/141	470/18830	3.69383	5.4e-05	0.00577054	Selenok/Vcam1/Elane/Fgg/Fga/Anxa1/Pck1/Fgb/Ctsg/Sdc4/Sirpa/Icam1/Zbtb16	13
BP	GO:0097191	extrinsic apoptotic signaling pathway	9/141	227/18830	5.29478	5.4e-05	0.00577054	Tnfaip3/Agt/Fgg/Fga/Hmox1/Fgb/Lcn2/Icam1/Ppp2r1b	9
BP	GO:0032640	tumor necrosis factor production	8/141	176/18830	6.07028	5.5e-05	0.00579368	Selenok/Clu/Orm1/Tnfaip3/Stat3/Sirpa/Lpl/Lbp	8
BP	GO:0032680	regulation of tumor necrosis factor production	8/141	176/18830	6.07028	5.5e-05	0.00579368	Selenok/Clu/Orm1/Tnfaip3/Stat3/Sirpa/Lpl/Lbp	8
BP	GO:0097529	myeloid leukocyte migration	9/141	229/18830	5.24854	5.8e-05	0.00596262	Il1r1/Itgam/S100a9/Anxa1/Ctsg/S100a8/Sirpa/Lbp/Cxcl9	9
BP	GO:2000351	regulation of endothelial cell apoptotic process	5/141	56/18830	11.9238	6.2e-05	0.00629416	Tnfaip3/Fgg/Fga/Fgb/Icam1	5
BP	GO:0071706	tumor necrosis factor superfamily cytokine production	8/141	180/18830	5.93538	6.4e-05	0.00641699	Selenok/Clu/Orm1/Tnfaip3/Stat3/Sirpa/Lpl/Lbp	8
BP	GO:1903555	regulation of tumor necrosis factor superfamily cytokine production	8/141	180/18830	5.93538	6.4e-05	0.00641699	Selenok/Clu/Orm1/Tnfaip3/Stat3/Sirpa/Lpl/Lbp	8
BP	GO:0001906	cell killing	8/141	181/18830	5.90259	6.7e-05	0.00663586	Ncf1/Np4/Itgam/Gzmb/Elane/Lyz1/Ctsg/Defa	8
BP	GO:1901652	response to peptide	16/141	696/18830	3.07003	6.7e-05	0.00663586	Pkm/Vcam1/Slc2a1/Orm1/Hp/Tnfaip3/Agt/Fga/Anxa1/Pck1/Ptpn1/Lcn2/Stat3/Icam1/Lpl/Abcg2	16
BP	GO:0098754	detoxification	7/141	135/18830	6.92461	7.1e-05	0.00698941	Akr1b8/Mpo/S100a9/Hp/Mt1m/S100a8/Abcg2	7
BP	GO:0065008	regulation of biological quality	52/141	4234/18830	1.64015	7.2e-05	0.00701621	Selenok/Slc11a2/Akr1b8/C1qtnf1/Plscr1/Alpl/Vcam1/Il1r1/Slc2a1/Dsc2/Itgam/Steap4/Clu/Slc4a4/Il1rn/S100a9/Synpo/Ncf2/Dhrs13/Mt1m/Smtnl2/Plin2/Tnfaip3/Nos1ap/Agt/Fgg/Fga/Hmox1/Anxa1/Pck1/Cnp/Fgb/Ctsg/Hpx/Ifrd1/Hk2/Lcn2/S1pr2/Sqle/Stat3/Fabp5/Rhob/Sirpa/Icam1/Lpl/Lbp/Saa4/Defa/Serpina10/Serping1/Gnl3/Cxcl9	52
BP	GO:0032731	positive regulation of interleukin-1 beta production	5/141	58/18830	11.5126	7.3e-05	0.00701621	Orm1/Gbp5/Stat3/Lpl/Mnda	5
BP	GO:0070527	platelet aggregation	5/141	58/18830	11.5126	7.3e-05	0.00701621	C1qtnf1/Fgg/Fga/Fgb/Ctsg	5
BP	GO:0031669	cellular response to nutrient levels	10/141	293/18830	4.55789	7.3e-05	0.00701621	Slc2a1/Dsc2/Map1lc3b2/Hmox1/Pck1/Lcn2/Asns/Icam1/Lpl/Slc38a3	10
BP	GO:0045321	leukocyte activation	20/141	1025/18830	2.60578	7.9e-05	0.00750408	Selenok/Plscr1/Vcam1/Itgam/Clu/Ctps1/Impdh2/Tnfaip3/Hmox1/Anxa1/Pck1/Ctsg/Sdc4/Stat3/Sirpa/Icam1/Lbp/Fgl1/Zbtb16/Mnda	20
BP	GO:0051181	cofactor transport	5/141	59/18830	11.3175	7.9e-05	0.00750408	Slc13a5/Hpx/Lcn2/Slc25a29/Abcg2	5
BP	GO:2001234	negative regulation of apoptotic signaling pathway	9/141	239/18830	5.02893	8e-05	0.00755488	Clu/Ybx3/Tnfaip3/Fgg/Fga/Hmox1/Fgb/Ptpn1/Icam1	9
BP	GO:0048518	positive regulation of biological process	70/141	6396/18830	1.46157	8.4e-05	0.00788677	Suco/Ncf1/Cfb/Selenok/Pkm/C1qtnf1/Plscr1/Alpl/Vcam1/Il1r1/Itgam/Clu/Slc4a4/Il1rn/Orm1/S100a9/Hp/Synpo/Gzmb/Ncf2/Cebpz/Smtnl2/Elane/Nnmt/Myorg/Gbp5/Ybx3/Plin2/Oasl/Tnfaip3/Nos1ap/Agt/Fgg/S100a4/A2m/Fga/Hmox1/Anxa1/Pck1/Fgb/Ctsg/Hpx/Ptpn1/Ifrd1/Tgm1/Hk2/Lcn2/Sdc4/S1pr2/Asns/S100a8/Stat3/Fabp5/Rhob/Sirpa/Icam1/Lpl/Ddx21/Lbp/Ppp2r1b/Ifit2/Zbtb16/Mnda/Serping1/Gnl3/Cxcl9/Rbm3/Sec14l2/Niban1/Slc38a3	70
BP	GO:0072577	endothelial cell apoptotic process	5/141	60/18830	11.1288	8.6e-05	0.00798227	Tnfaip3/Fgg/Fga/Fgb/Icam1	5
BP	GO:0044419	interspecies interaction between organisms	12/141	426/18830	3.76186	8.8e-05	0.0081215	Ncf1/Plscr1/Np4/S100a9/Elane/Oasl/Lyz1/Ctsg/Mx1/Icam1/Gbp2/Defa	12
BP	GO:1904035	regulation of epithelial cell apoptotic process	6/141	97/18830	8.26058	9e-05	0.00825915	Tnfaip3/Fgg/Fga/Hmox1/Fgb/Icam1	6
BP	GO:0051607	defense response to virus	9/141	243/18830	4.94615	9.1e-05	0.00830401	Selenok/Plscr1/Ifit1/Oasl/Mx1/Ddx21/Ifit2/Ifit3/Cxcl9	9
BP	GO:0007568	aging	13/141	497/18830	3.49316	9.4e-05	0.00848246	Vcam1/Mpo/Clu/Hp/Ncf2/Zfp277/Agt/Pck1/Cnp/Stat3/Icam1/Serping1/Abcg2	13
BP	GO:2001237	negative regulation of extrinsic apoptotic signaling pathway	6/141	98/18830	8.17629	9.5e-05	0.00852533	Tnfaip3/Fgg/Fga/Hmox1/Fgb/Icam1	6
BP	GO:0042981	regulation of apoptotic process	26/141	1571/18830	2.21018	9.7e-05	0.00865698	Plscr1/Itgam/Clu/Il1rn/S100a9/Ncf2/Ybx3/Tnfaip3/Agt/Fgg/Fga/Hmox1/Anxa1/Fgb/Ptpn1/Lcn2/Asns/S100a8/Rhob/Icam1/Ppp2r1b/Ifit2/Zbtb16/Mnda/Ciapin1/Ifit3	26
BP	GO:0050829	defense response to Gram-negative bacterium	6/141	99/18830	8.0937	0.0001	0.00887596	Np4/Elane/Lyz1/Ctsg/Lbp/Defa	6
BP	GO:0071496	cellular response to external stimulus	12/141	434/18830	3.69252	0.00011	0.00960608	Vcam1/Slc2a1/Dsc2/Map1lc3b2/Agt/Hmox1/Pck1/Lcn2/Asns/Icam1/Lpl/Slc38a3	12
BP	GO:0022610	biological adhesion	24/141	1398/18830	2.29264	0.00011	0.00960608	Selenok/C1qtnf1/Vcam1/Dsc2/Itgam/Il1rn/S100a9/Elane/Lgals3bp/Agt/Fgg/Fga/Anxa1/Pck1/Fgb/Ctsg/Sdc4/S100a8/Rhob/Sirpa/Icam1/Fgl1/Gbp2/Zbtb16	24
BP	GO:0043065	positive regulation of apoptotic process	15/141	666/18830	3.0078	0.00014	0.0120319	Plscr1/Itgam/Clu/S100a9/Ncf2/Agt/Hmox1/Anxa1/Lcn2/S100a8/Rhob/Ppp2r1b/Ifit2/Zbtb16/Mnda	15
BP	GO:0042542	response to hydrogen peroxide	8/141	203/18830	5.2629	0.00015	0.0127563	Hp/Tnfaip3/Zfp277/Hmox1/Anxa1/Lcn2/Rhob/Sirpa	8
BP	GO:0032732	positive regulation of interleukin-1 production	5/141	68/18830	9.81957	0.00016	0.0135358	Orm1/Gbp5/Stat3/Lpl/Mnda	5
BP	GO:0045428	regulation of nitric oxide biosynthetic process	5/141	69/18830	9.67725	0.00017	0.013946	Clu/Nos1ap/Agt/Sirpa/Icam1	5
BP	GO:1903034	regulation of response to wounding	8/141	207/18830	5.1612	0.00017	0.013946	C1qtnf1/S100a9/Fgg/Fga/Anxa1/Fgb/Ctsg/Serping1	8
BP	GO:0032760	positive regulation of tumor necrosis factor production	6/141	109/18830	7.35116	0.00017	0.013946	Selenok/Clu/Orm1/Stat3/Lpl/Lbp	6
BP	GO:0002694	regulation of leukocyte activation	15/141	677/18830	2.95892	0.00017	0.013946	Selenok/Plscr1/Vcam1/Itgam/Tnfaip3/Hmox1/Anxa1/Pck1/Ctsg/Sdc4/Sirpa/Lbp/Fgl1/Zbtb16/Mnda	15
BP	GO:0035821	modification of morphology or physiology of other organism	7/141	156/18830	5.99245	0.00017	0.013946	Ncf1/Np4/S100a9/Elane/Lyz1/Ctsg/Defa	7
BP	GO:0042110	T cell activation	13/141	530/18830	3.27566	0.00018	0.014546	Selenok/Vcam1/Itgam/Ctps1/Anxa1/Pck1/Ctsg/Sdc4/Stat3/Sirpa/Icam1/Fgl1/Zbtb16	13
BP	GO:0045088	regulation of innate immune response	10/141	327/18830	4.08398	0.00018	0.014546	Ncf1/Plscr1/Gbp5/Oasl/Tnfaip3/A2m/Hpx/Lbp/Mnda/Serping1	10
BP	GO:0002699	positive regulation of immune effector process	9/141	267/18830	4.50155	0.00019	0.0151283	Il1r1/Itgam/Oasl/Hmox1/Anxa1/Pck1/Hpx/Ddx21/Lbp	9
BP	GO:1903557	positive regulation of tumor necrosis factor superfamily cytokine production	6/141	111/18830	7.21871	0.00019	0.0151283	Selenok/Clu/Orm1/Stat3/Lpl/Lbp	6
BP	GO:0006879	cellular iron ion homeostasis	5/141	71/18830	9.40465	0.00019	0.0151283	Slc11a2/Steap4/Hmox1/Hpx/Lcn2	5
BP	GO:0034614	cellular response to reactive oxygen species	8/141	213/18830	5.01582	0.00021	0.0165584	Ncf1/Mpo/Tnfaip3/Zfp277/Anxa1/Lcn2/Rhob/Sirpa	8
BP	GO:0002443	leukocyte mediated immunity	12/141	469/18830	3.41696	0.00022	0.0168559	Ncf1/Cfb/Il1r1/Itgam/Gzmb/Elane/Hmox1/Ctsg/Hpx/Icam1/Ddx21/Serping1	12
BP	GO:0042310	vasoconstriction	6/141	114/18830	7.02874	0.00022	0.0168559	Smtnl2/Agt/Fgg/Fga/Fgb/Icam1	6
BP	GO:0046916	cellular transition metal ion homeostasis	6/141	114/18830	7.02874	0.00022	0.0168559	Slc11a2/Steap4/Mt1m/Hmox1/Hpx/Lcn2	6
BP	GO:0097756	negative regulation of blood vessel diameter	6/141	114/18830	7.02874	0.00022	0.0168559	Smtnl2/Agt/Fgg/Fga/Fgb/Icam1	6
BP	GO:0090559	regulation of membrane permeability	5/141	73/18830	9.14699	0.00022	0.0168559	Cnp/Hk2/Stat3/Lbp/Defa	5
BP	GO:0030155	regulation of cell adhesion	16/141	773/18830	2.76421	0.00022	0.0168559	Selenok/C1qtnf1/Vcam1/Il1rn/Elane/Fgg/Fga/Anxa1/Pck1/Fgb/Ctsg/Sdc4/Sirpa/Icam1/Fgl1/Zbtb16	16
BP	GO:0061045	negative regulation of wound healing	5/141	74/18830	9.02339	0.00023	0.0175394	C1qtnf1/Fgg/Fga/Fgb/Serping1	5
BP	GO:0002250	adaptive immune response	12/141	474/18830	3.38091	0.00024	0.0182164	Cfb/Il1r1/Gzmb/Tnfaip3/Fga/Anxa1/Fgb/Hpx/Stat3/Icam1/Fgl1/Serping1	12
BP	GO:0006979	response to oxidative stress	13/141	548/18830	3.16806	0.00025	0.0187131	Ncf1/Selenok/Mpo/Il1r1/Itgam/Hp/Tnfaip3/Zfp277/Hmox1/Anxa1/Lcn2/Rhob/Sirpa	13
BP	GO:0002444	myeloid leukocyte mediated immunity	6/141	117/18830	6.84852	0.00025	0.0187131	Ncf1/Itgam/Elane/Hmox1/Ctsg/Ddx21	6
BP	GO:0007155	cell adhesion	23/141	1388/18830	2.21294	0.00025	0.0187131	Selenok/C1qtnf1/Vcam1/Dsc2/Itgam/Il1rn/S100a9/Elane/Lgals3bp/Agt/Fgg/Fga/Anxa1/Pck1/Fgb/Ctsg/Sdc4/S100a8/Rhob/Sirpa/Icam1/Fgl1/Zbtb16	23
BP	GO:0009410	response to xenobiotic stimulus	17/141	875/18830	2.59461	0.0003	0.0220493	Il1rn/Orm1/Hp/Ncf2/Nceh1/Nnmt/Plin2/Fga/Hmox1/Anxa1/Pck1/Lcn2/Stat3/Icam1/Lpl/Mcm7/Abcg2	17
BP	GO:0006006	glucose metabolic process	8/141	225/18830	4.74831	0.0003	0.0220493	Fam3c/Pkm/C1qtnf1/Nnmt/Pck1/Hk2/Fabp5/Fgl1	8
BP	GO:0031349	positive regulation of defense response	11/141	416/18830	3.53127	0.0003	0.0220493	Plscr1/S100a9/Gbp5/Oasl/Tnfaip3/Hpx/S100a8/Stat3/Lpl/Lbp/Mnda	11
BP	GO:0034599	cellular response to oxidative stress	10/141	352/18830	3.79392	0.00032	0.0232043	Ncf1/Mpo/Itgam/Tnfaip3/Zfp277/Hmox1/Anxa1/Lcn2/Rhob/Sirpa	10
BP	GO:1990748	cellular detoxification	6/141	123/18830	6.51444	0.00033	0.0235096	Akr1b8/Mpo/S100a9/Hp/S100a8/Abcg2	6
BP	GO:0070482	response to oxygen levels	12/141	491/18830	3.26386	0.00033	0.0235096	Slc11a2/Pkm/Vcam1/Slc2a1/Hp/Ncf2/Plod2/Hmox1/Pck1/Hk2/Lcn2/Icam1	12
BP	GO:0034404	nucleobase-containing small molecule biosynthetic process	8/141	231/18830	4.62497	0.00036	0.0250965	Pkm/Slc4a4/Ctps1/Prtfdc1/Impdh2/Cnp/Hk2/Stat3	8
BP	GO:0002437	inflammatory response to antigenic stimulus	5/141	81/18830	8.24359	0.00036	0.0250965	Il1rn/Orm1/Elane/A2m/Icam1	5
BP	GO:0071621	granulocyte chemotaxis	6/141	125/18830	6.41021	0.00036	0.0250965	Itgam/S100a9/Anxa1/S100a8/Lbp/Cxcl9	6
BP	GO:0048522	positive regulation of cellular process	62/141	5691/18830	1.4549	0.00037	0.0256834	Suco/Ncf1/Cfb/Selenok/Pkm/C1qtnf1/Plscr1/Vcam1/Il1r1/Itgam/Clu/Slc4a4/Il1rn/S100a9/Hp/Synpo/Gzmb/Ncf2/Cebpz/Elane/Nnmt/Myorg/Gbp5/Oasl/Tnfaip3/Nos1ap/Agt/Fgg/S100a4/Fga/Hmox1/Anxa1/Pck1/Fgb/Ctsg/Hpx/Ptpn1/Ifrd1/Tgm1/Hk2/Lcn2/Sdc4/S1pr2/Asns/S100a8/Stat3/Fabp5/Rhob/Sirpa/Icam1/Lpl/Ddx21/Lbp/Ppp2r1b/Ifit2/Zbtb16/Mnda/Gnl3/Cxcl9/Rbm3/Niban1/Slc38a3	62
BP	GO:0006809	nitric oxide biosynthetic process	5/141	82/18830	8.14305	0.00038	0.026154	Clu/Nos1ap/Agt/Sirpa/Icam1	5
BP	GO:0061844	antimicrobial humoral immune response mediated by antimicrobial peptide	5/141	82/18830	8.14305	0.00038	0.026154	Np4/S100a9/Elane/Defa/Cxcl9	5
BP	GO:0046394	carboxylic acid biosynthetic process	11/141	429/18830	3.42426	0.00039	0.0266167	Pkm/Slc4a4/Mthfd1l/Plod2/Agt/Anxa1/Hk2/Asns/Stat3/Fabp5/Lpl	11
BP	GO:0032508	DNA duplex unwinding	5/141	83/18830	8.04495	0.0004	0.0271849	Mcm5/Mcm6/Mcm2/Anxa1/Mcm7	5
BP	GO:1904019	epithelial cell apoptotic process	6/141	128/18830	6.25997	0.00041	0.0276333	Tnfaip3/Fgg/Fga/Hmox1/Fgb/Icam1	6
BP	GO:0016053	organic acid biosynthetic process	11/141	431/18830	3.40837	0.00041	0.0276333	Pkm/Slc4a4/Mthfd1l/Plod2/Agt/Anxa1/Hk2/Asns/Stat3/Fabp5/Lpl	11
BP	GO:1990266	neutrophil migration	6/141	129/18830	6.21145	0.00042	0.0281903	Il1r1/Itgam/S100a9/S100a8/Lbp/Cxcl9	6
BP	GO:0051384	response to glucocorticoid	9/141	299/18830	4.01978	0.00043	0.028625	Alpl/Il1rn/Orm1/Hp/A2m/Anxa1/Pck1/Icam1/Abcg2	9
BP	GO:1903039	positive regulation of leukocyte cell-cell adhesion	8/141	238/18830	4.48894	0.00043	0.028625	Selenok/Vcam1/Elane/Anxa1/Pck1/Sirpa/Icam1/Zbtb16	8
BP	GO:0051241	negative regulation of multicellular organismal process	22/141	1352/18830	2.17309	0.00045	0.0298341	Ncf1/C1qtnf1/Nbr1/Orm1/Elane/Prg4/Ybx3/Tnfaip3/Agt/Fgg/Fga/Hmox1/Anxa1/Fgb/Ifrd1/S1pr2/Stat3/Sirpa/Lbp/Zbtb16/Serping1/Abcg2	22
BP	GO:0046209	nitric oxide metabolic process	5/141	87/18830	7.67506	0.0005	0.0330142	Clu/Nos1ap/Agt/Sirpa/Icam1	5
BP	GO:0042594	response to starvation	8/141	244/18830	4.37856	0.00051	0.0335382	Slc2a1/Dsc2/Map1lc3b2/Il1rn/Hp/Pck1/Asns/Slc38a3	8
BP	GO:0002532	production of molecular mediator involved in inflammatory response	5/141	88/18830	7.58785	0.00052	0.0340579	Ncf1/Gbp5/Stat3/Sirpa/Lbp	5
BP	GO:0019229	regulation of vasoconstriction	5/141	89/18830	7.50259	0.00055	0.0348971	Smtnl2/Fgg/Fga/Fgb/Icam1	5
BP	GO:0032392	DNA geometric change	5/141	89/18830	7.50259	0.00055	0.0348971	Mcm5/Mcm6/Mcm2/Anxa1/Mcm7	5
BP	GO:2001057	reactive nitrogen species metabolic process	5/141	89/18830	7.50259	0.00055	0.0348971	Clu/Nos1ap/Agt/Sirpa/Icam1	5
BP	GO:0070301	cellular response to hydrogen peroxide	6/141	136/18830	5.89174	0.00056	0.0353933	Tnfaip3/Zfp277/Anxa1/Lcn2/Rhob/Sirpa	6
BP	GO:0046649	lymphocyte activation	16/141	841/18830	2.54071	0.00057	0.0357471	Selenok/Vcam1/Itgam/Ctps1/Impdh2/Tnfaip3/Anxa1/Pck1/Ctsg/Sdc4/Stat3/Sirpa/Icam1/Fgl1/Zbtb16/Mnda	16
BP	GO:0036293	response to decreased oxygen levels	11/141	449/18830	3.27173	0.00057	0.0357471	Slc11a2/Pkm/Vcam1/Slc2a1/Hp/Plod2/Hmox1/Pck1/Hk2/Lcn2/Icam1	11
BP	GO:0043434	response to peptide hormone	13/141	600/18830	2.8935	0.00058	0.0362344	Pkm/Slc2a1/Orm1/Hp/Agt/Fga/Anxa1/Pck1/Ptpn1/Stat3/Icam1/Lpl/Abcg2	13
BP	GO:0051716	cellular response to stimulus	82/141	8329/18830	1.31478	0.00059	0.0367179	Ncf1/Cfb/Selenok/Slc11a2/Akr1b8/Pkm/C1qtnf1/Mcm5/Plscr1/Nbr1/Alpl/Vcam1/Mpo/Il1r1/Slc2a1/Np4/Dsc2/Itgam/Map1lc3b2/Clu/Il1rn/Orm1/S100a9/Slc13a5/Hp/Ncf2/Mcm6/Rexo4/Nceh1/Cmpk2/Mt1m/Mcm2/Plod2/Myorg/Impdh2/Ifit1/Rnf213/Gbp5/Ybx3/Oasl/Tnfaip3/Bysl/Zfp277/Nos1ap/Agt/Fgg/S100a4/Fga/Hmox1/Anxa1/Pck1/Fgb/Ctsg/Mx1/Hpx/Ptpn1/Hk2/Lcn2/S1pr2/Asns/S100a8/Stat3/Fabp5/Rhob/Sirpa/Icam1/Lpl/Ddx21/Lbp/Ppp2r1b/RGD…	82
BP	GO:0006165	nucleoside diphosphate phosphorylation	6/141	138/18830	5.80635	0.00061	0.0378177	Pkm/Slc4a4/Cmpk2/Pck1/Hk2/Stat3	6
BP	GO:0010876	lipid localization	11/141	455/18830	3.22859	0.00064	0.0395267	C1qtnf1/Plscr1/Slc2a1/Plin2/Agt/Anxa1/Sqle/Fabp5/Lpl/Lbp/Abcg2	11
BP	GO:0010212	response to ionizing radiation	7/141	194/18830	4.81867	0.00065	0.0399922	Vcam1/Hp/Fga/Anxa1/Lcn2/Rhob/Icam1	7
BP	GO:0055082	cellular chemical homeostasis	17/141	938/18830	2.42035	0.00066	0.0404543	Selenok/Slc11a2/C1qtnf1/Vcam1/Il1r1/Steap4/Slc4a4/Synpo/Mt1m/Agt/Hmox1/Pck1/Hpx/Hk2/Lcn2/Icam1/Cxcl9	17
BP	GO:0072330	monocarboxylic acid biosynthetic process	9/141	318/18830	3.77961	0.00067	0.0404565	Pkm/Slc4a4/Agt/Anxa1/Hk2/Asns/Stat3/Fabp5/Lpl	9
BP	GO:0009314	response to radiation	12/141	532/18830	3.01232	0.00067	0.0404565	Vcam1/Il1r1/Clu/Hp/Synpo/Elane/Fga/Anxa1/Lcn2/Asns/Rhob/Icam1	12
BP	GO:0015711	organic anion transport	12/141	532/18830	3.01232	0.00067	0.0404565	Plscr1/Slc2a1/Slc4a4/Il1rn/Slc13a5/Plin2/Agt/Anxa1/Fabp5/Slc25a29/Abcg2/Slc38a3	12
BP	GO:1903035	negative regulation of response to wounding	5/141	93/18830	7.1799	0.00067	0.0404565	C1qtnf1/Fgg/Fga/Fgb/Serping1	5
BP	GO:0046939	nucleotide phosphorylation	6/141	141/18830	5.68281	0.00068	0.0407573	Pkm/Slc4a4/Cmpk2/Pck1/Hk2/Stat3	6
BP	GO:0055076	transition metal ion homeostasis	6/141	141/18830	5.68281	0.00068	0.0407573	Slc11a2/Steap4/Mt1m/Hmox1/Hpx/Lcn2	6
BP	GO:0019318	hexose metabolic process	8/141	256/18830	4.17332	0.0007	0.0418018	Fam3c/Pkm/C1qtnf1/Nnmt/Pck1/Hk2/Fabp5/Fgl1	8
BP	GO:0055072	iron ion homeostasis	5/141	94/18830	7.10352	0.00071	0.0419365	Slc11a2/Steap4/Hmox1/Hpx/Lcn2	5
BP	GO:0006909	phagocytosis	9/141	321/18830	3.74428	0.00071	0.0419365	Cfb/Plscr1/Itgam/Ncf2/Ncf4/Elane/Anxa1/Sirpa/Lbp	9
BP	GO:0030168	platelet activation	5/141	95/18830	7.02874	0.00074	0.0433929	C1qtnf1/Fgg/Fga/Fgb/Ctsg	5
BP	GO:0046942	carboxylic acid transport	10/141	392/18830	3.40679	0.00075	0.043821	Slc2a1/Il1rn/Slc13a5/Plin2/Agt/Anxa1/Fabp5/Slc25a29/Abcg2/Slc38a3	10
BP	GO:0015849	organic acid transport	10/141	394/18830	3.38949	0.00078	0.0454105	Slc2a1/Il1rn/Slc13a5/Plin2/Agt/Anxa1/Fabp5/Slc25a29/Abcg2/Slc38a3	10
BP	GO:0022408	negative regulation of cell-cell adhesion	7/141	201/18830	4.65086	0.00081	0.0464086	C1qtnf1/Il1rn/Fgg/Anxa1/Ctsg/Sdc4/Fgl1	7
BP	GO:0031960	response to corticosteroid	9/141	327/18830	3.67558	0.00081	0.0464086	Alpl/Il1rn/Orm1/Hp/A2m/Anxa1/Pck1/Icam1/Abcg2	9
BP	GO:0002695	negative regulation of leukocyte activation	7/141	202/18830	4.62784	0.00083	0.0468114	Tnfaip3/Hmox1/Anxa1/Ctsg/Sdc4/Fgl1/Mnda	7
BP	GO:0062012	regulation of small molecule metabolic process	10/141	398/18830	3.35543	0.00084	0.0472115	Fam3c/C1qtnf1/Slc4a4/Nnmt/Agt/Anxa1/Stat3/Fabp5/Fgl1/Sec14l2	10
BP	GO:0032602	chemokine production	5/141	98/18830	6.81358	0.00085	0.0474452	Selenok/Elane/Sirpa/Lpl/Lbp	5
BP	GO:0032642	regulation of chemokine production	5/141	98/18830	6.81358	0.00085	0.0474452	Selenok/Elane/Sirpa/Lpl/Lbp	5
BP	GO:0009967	positive regulation of signal transduction	24/141	1613/18830	1.98705	0.00088	0.0487844	Ncf1/C1qtnf1/Plscr1/Il1r1/Clu/Il1rn/S100a9/Myorg/Oasl/Tnfaip3/Agt/Fgg/S100a4/Fga/Fgb/Hpx/Ptpn1/S100a8/Stat3/Fabp5/Icam1/Ddx21/Lbp/Ppp2r1b	24
BP	GO:0009142	nucleoside triphosphate biosynthetic process	7/141	204/18830	4.58246	0.00088	0.0487844	Pkm/Slc4a4/Ctps1/Cmpk2/Impdh2/Hk2/Stat3	7
BP	GO:0005975	carbohydrate metabolic process	13/141	629/18830	2.76009	0.0009	0.0497235	Fam3c/Pkm/C1qtnf1/Slc4a4/B3galt1/Nnmt/Myorg/Pck1/Hk2/Stat3/Fabp5/Fgl1/Abcg2	13
