# Supplementary material for: Liver proteomic analysis reveals the key proteins involved in host immune response to sepsis
Source: PeerJ. 2023 May 26;11:e15294. doi: 10.7717/peerj.15294 (PMC10226476; doi:10.7717/peerj.15294)
Supplement: Supplemental Information 3 [file peerj-11-15294-s003.xlsx]

## Sheet: Sheet1
Table S3:GO enrichment analysis of downregulated DEPs
Category	ID	Description	GeneRatio	BgRatio	FoldEnrichment	pvalue	p.adjust	genes	Count
CC	GO:0044432	endoplasmic reticulum part	20/87	1048/19411	4.25792	2.8e-08	2.2297e-05	Fmo3/Hsd3b5/LOC100910877/Cyp2e1/Cyp2c11/Cyp2w1/Fads2/Cyp2c13/Cyp39a1/Cyp3a18/Cyp3a9/Cyp1a2/Cyp3a1/Cyp3a2/Scd1/Cyp2c23/Srebf1/Mettl7b/Cyp2d4/Insig2	20
CC	GO:0005789	endoplasmic reticulum membrane	19/87	945/19411	4.48591	2.9e-08	2.2297e-05	Fmo3/Hsd3b5/LOC100910877/Cyp2e1/Cyp2c11/Fads2/Cyp2c13/Cyp39a1/Cyp3a18/Cyp3a9/Cyp1a2/Cyp3a1/Cyp3a2/Scd1/Cyp2c23/Srebf1/Mettl7b/Cyp2d4/Insig2	19
CC	GO:0098827	endoplasmic reticulum subcompartment	19/87	953/19411	4.44825	3.3e-08	2.2297e-05	Fmo3/Hsd3b5/LOC100910877/Cyp2e1/Cyp2c11/Fads2/Cyp2c13/Cyp39a1/Cyp3a18/Cyp3a9/Cyp1a2/Cyp3a1/Cyp3a2/Scd1/Cyp2c23/Srebf1/Mettl7b/Cyp2d4/Insig2	19
CC	GO:0042175	nuclear outer membrane-endoplasmic reticulum membrane network	19/87	983/19411	4.3125	5.4e-08	2.73645e-05	Fmo3/Hsd3b5/LOC100910877/Cyp2e1/Cyp2c11/Fads2/Cyp2c13/Cyp39a1/Cyp3a18/Cyp3a9/Cyp1a2/Cyp3a1/Cyp3a2/Scd1/Cyp2c23/Srebf1/Mettl7b/Cyp2d4/Insig2	19
CC	GO:0031984	organelle subcompartment	20/87	1491/19411	2.99282	7.3e-06	0.00295942	Fmo3/Hsd3b5/LOC100910877/Cyp2e1/Cyp2c11/Fads2/Cyp2c13/Cyp39a1/Cyp3a18/Cyp3a9/Cyp1a2/Cyp3a1/Cyp3a2/Scd1/Cyp2c23/Srebf1/Slc39a13/Mettl7b/Cyp2d4/Insig2	20
CC	GO:0005783	endoplasmic reticulum	21/87	1680/19411	2.78894	1.2e-05	0.004054	Fmo3/Hsd3b5/LOC100910877/Cyp2e1/Cyp2c11/Cyp2w1/Fads2/Cyp2c13/Cyp39a1/Cyp3a18/Cyp3a9/Cyp1a2/Cyp3a1/Cyp3a2/Scd1/Cyp2c23/Srebf1/Slc39a13/Mettl7b/Cyp2d4/Insig2	21
MF	GO:0016705	oxidoreductase activity, acting on paired donors, with incorporation or reduction of molecular oxygen	22/85	225/17560	20.1997	5.1e-23	2.3868e-19	Fmo3/LOC100910877/Cyp2t1/Cyp2e1/Cyp2c11/Cyp2w1/Fads2/Cyp2c6v1/Cyp2c13/Fads6/Cyp39a1/RGD1564865/Cyp3a18/Cyp3a9/Pah/Cyp1a2/Cyp3a1/Cyp3a2/Scd1/Cyp2c23/Akr1c1/Cyp2d4	22
MF	GO:0004497	monooxygenase activity	19/85	157/17560	25.0011	1e-21	2.34e-18	Fmo3/LOC100910877/Cyp2t1/Cyp2e1/Cyp2c11/Cyp2w1/Cyp2c6v1/Cyp2c13/Cyp39a1/RGD1564865/Cyp3a18/Cyp3a9/Pah/Cyp1a2/Cyp3a1/Cyp3a2/Cyp2c23/Akr1c1/Cyp2d4	19
MF	GO:0016491	oxidoreductase activity	31/85	831/17560	7.70666	6.4e-20	9.984e-17	Fmo3/Hsd3b5/LOC100910877/Aox3/Cyp2t1/Cyp2e1/Cyp2c11/Cyp2w1/Fads2/Cyp2c6v1/Cyp2c13/Fads6/Cyp39a1/LOC100362350/Selenbp1/Aox1/RGD1564865/Cyp3a18/Dhrs7l1/Cyp3a9/Pah/Cyp1a2/Cyp3a1/Cyp3a2/Scd1/Uox/Cyp2c23/Akr1c1/Hsd17b2/Cyp2d4/Pyroxd2	31
MF	GO:0005506	iron ion binding	19/85	224/17560	17.5231	9.6e-19	1.1232e-15	LOC100910877/Aox3/Cyp2t1/Cyp2e1/Cyp2c11/Cyp2w1/Cyp2c6v1/Cyp2c13/Cyp39a1/Aox1/Cyp3a18/Cyp3a9/Pah/Cyp1a2/Cyp3a1/Cyp3a2/Scd1/Cyp2c23/Cyp2d4	19
MF	GO:0016712	oxidoreductase activity, acting on paired donors, with incorporation or reduction of molecular oxygen, reduced flavin or flavoprotein as one donor, an...	13/85	60/17560	44.7608	1.3e-18	1.2168e-15	LOC100910877/Cyp2t1/Cyp2e1/Cyp2c11/Cyp2w1/Cyp2c13/Cyp3a18/Cyp3a9/Cyp1a2/Cyp3a1/Cyp3a2/Cyp2c23/Cyp2d4	13
MF	GO:0008395	steroid hydroxylase activity	13/85	64/17560	41.9632	3.3e-18	2.574e-15	Cyp2t1/Cyp2e1/Cyp2c11/Cyp2w1/Cyp2c13/Cyp39a1/Cyp3a18/Cyp3a9/Cyp1a2/Cyp3a1/Cyp3a2/Cyp2c23/Cyp2d4	13
MF	GO:0070330	aromatase activity	10/85	44/17560	46.9519	8.9e-15	5.3235e-12	LOC100910877/Cyp2e1/Cyp2c11/Cyp2c13/Cyp3a18/Cyp3a9/Cyp1a2/Cyp3a1/Cyp3a2/Cyp2d4	10
MF	GO:0020037	heme binding	15/85	182/17560	17.0265	9.1e-15	5.3235e-12	LOC100910877/Cyp2t1/Cyp2e1/Cyp2c11/Cyp2w1/Cyp2c6v1/Cyp2c13/Cyp39a1/Cyp3a18/Cyp3a9/Cyp1a2/Cyp3a1/Cyp3a2/Cyp2c23/Cyp2d4	15
MF	GO:0046906	tetrapyrrole binding	15/85	191/17560	16.2242	1.9e-14	9.88e-12	LOC100910877/Cyp2t1/Cyp2e1/Cyp2c11/Cyp2w1/Cyp2c6v1/Cyp2c13/Cyp39a1/Cyp3a18/Cyp3a9/Cyp1a2/Cyp3a1/Cyp3a2/Cyp2c23/Cyp2d4	15
MF	GO:0048037	cofactor binding	22/85	606/17560	7.4999	7.8e-14	3.6504e-11	Fmo3/LOC100910877/Gpt2/Aox3/Cyp2t1/Cyp2e1/Cyp2c11/Cyp2w1/Cyp2c6v1/Cyp2c13/Cyp39a1/Aox1/Cyp3a18/Etnppl/Cyp3a9/Cyp1a2/Cyp3a1/Cyp3a2/Gnmt/Cyp2c23/Agxt2/Cyp2d4	22
MF	GO:0008391	arachidonic acid monooxygenase activity	6/85	42/17560	29.5126	4.9e-08	1.911e-05	Cyp2t1/Cyp2e1/Cyp2c11/Cyp2c13/Cyp2c23/Cyp2d4	6
MF	GO:0003824	catalytic activity	53/85	5939/17560	1.84361	6.8e-08	2.448e-05	Fmo3/Hsd3b5/LOC100910877/Gpt2/Acnat2/Lipc/Aox3/Cyp2t1/F11/Sult1c3/Cyp2e1/Cyp2c11/Cyp2w1/Gls2/Fads2/Cyp2c6v1/Cyp2c13/Fads6/Lyplal1/Alpk3/Cyp39a1/LOC100362350/Selenbp1/Aox1/RGD1564865/Cyp3a18/Dhrs7l1/Etnppl/Ptprd/Urad/Cyp3a9/Pah/Cyp1a2/Cyp3a1/Cyp3a2/Scd1/Uox/Gnmt/Sult1a1/Cyp2c23/Ste/Ste2/Akr1c1/Mettl7b/Hsd17b2/Abcc2/Agxt2/Cyp2d4/Pyroxd2/Ppp1r3b/Pgpep1/Asrgl1/Xpnpep2	53
MF	GO:0046914	transition metal ion binding	20/85	1072/17560	3.85426	1.4e-07	4.095e-05	LOC100910877/Apoa4/Aox3/Cyp2t1/Cyp2e1/Cyp2c11/Cyp2w1/Cyp2c6v1/Cyp2c13/Cyp39a1/Aox1/Cyp3a18/Cyp3a9/Pah/Cyp1a2/Cyp3a1/Cyp3a2/Scd1/Cyp2c23/Cyp2d4	20
MF	GO:0008392	arachidonic acid epoxygenase activity	5/85	32/17560	32.2794	4.3e-07	0.0001144	Cyp2t1/Cyp2e1/Cyp2c11/Cyp2c13/Cyp2c23	5
MF	GO:0005496	steroid binding	7/85	108/17560	13.39	9.1e-07	0.00021294	Hsd3b5/Apoa4/Igf1/Cyp3a2/Ste/Ste2/Insig2	7
MF	GO:0030246	carbohydrate binding	8/85	266/17560	6.21318	4.4e-05	0.00762667	Slc2a5/Clec4g/Apcs/Colec10/Mbl2/Clec4f/RT1-Db1/Ppp1r3b	8
MF	GO:0048029	monosaccharide binding	5/85	89/17560	11.6061	7.1e-05	0.0107187	Slc2a5/Clec4g/Colec10/Mbl2/Clec4f	5
BP	GO:0006082	organic acid metabolic process	36/84	1120/18830	7.20536	2e-22	3.2486e-18	Gpt2/Acnat2/Apoa4/Igf1/Lipc/Cyp2t1/Cyp2e1/Cyp2w1/Gls2/Fads2/Cyp39a1/RGD1564865/Angptl3/Urad/Cyp3a9/Pah/Cyp1a2/Cyp3a2/Scd1/Cyp2c11/Uox/Gnmt/Sult1a1/Cyp2c13/Cyp2c23/Ste/Ste2/Srebf1/Akr1c1/Abcc2/Agxt2/Cyp2d4/Ttc36/Mid1ip1/Insig2/Asrgl1	36
BP	GO:0008202	steroid metabolic process	23/84	336/18830	15.3447	2.7e-21	2.1928e-17	Hsd3b5/Apoa4/Igf1/Lipc/Cyp2e1/Cyp39a1/RGD1564865/Angptl3/Cyp3a9/Cyp1a2/Cyp3a1/Cyp3a2/Scd1/Cyp2c11/Sult1a1/Ste/Ste2/Srebf1/Akr1c1/Hsd17b2/Cyp3a18/Cyp2d4/Insig2	23
BP	GO:0043436	oxoacid metabolic process	34/84	1093/18830	6.97316	1.3e-20	7.03863e-17	Gpt2/Acnat2/Apoa4/Igf1/Lipc/Cyp2t1/Cyp2e1/Cyp2w1/Gls2/Fads2/Cyp39a1/RGD1564865/Angptl3/Cyp3a9/Pah/Cyp1a2/Cyp3a2/Scd1/Cyp2c11/Gnmt/Sult1a1/Cyp2c13/Cyp2c23/Ste/Ste2/Srebf1/Akr1c1/Abcc2/Agxt2/Cyp2d4/Ttc36/Mid1ip1/Insig2/Asrgl1	34
BP	GO:0006805	xenobiotic metabolic process	16/84	132/18830	27.1717	5.7e-19	2.31463e-15	Cyp2t1/Cyp2e1/Cyp2w1/Aox1/Cyp3a9/Cyp1a2/Cyp3a1/Cyp3a2/Cyp2c11/Sult1a1/Cyp2c13/Cyp2c23/Aox3/Abcc2/Cyp2d4/Fmo3	16
BP	GO:0019752	carboxylic acid metabolic process	31/84	1037/18830	6.70122	3.4e-18	9.7458e-15	Gpt2/Acnat2/Apoa4/Igf1/Lipc/Cyp2t1/Cyp2e1/Cyp2w1/Gls2/Fads2/Cyp39a1/RGD1564865/Angptl3/Cyp3a9/Pah/Cyp1a2/Cyp3a2/Scd1/Cyp2c11/Gnmt/Cyp2c13/Cyp2c23/Srebf1/Akr1c1/Abcc2/Agxt2/Cyp2d4/Ttc36/Mid1ip1/Insig2/Asrgl1	31
BP	GO:0006629	lipid metabolic process	35/84	1407/18830	5.57629	3.6e-18	9.7458e-15	Hsd3b5/Acnat2/Apoa4/Igf1/Lipc/Cyp2t1/Cyp2e1/Cyp2w1/Fads2/Fads6/Cyp39a1/Aox1/RGD1564865/Angptl3/Adipor2/Cyp3a9/Ttr/Thrsp/Cyp1a2/Cyp3a1/Cyp3a2/Scd1/Cyp2c11/Sult1a1/Cyp2c13/Cyp2c23/Ste/Ste2/Srebf1/Akr1c1/Hsd17b2/Cyp3a18/Cyp2d4/Mid1ip1/Insig2	35
BP	GO:0032787	monocarboxylic acid metabolic process	26/84	667/18830	8.73813	6e-18	1.39226e-14	Acnat2/Apoa4/Igf1/Lipc/Cyp2t1/Cyp2e1/Cyp2w1/Fads2/Cyp39a1/RGD1564865/Angptl3/Cyp3a9/Cyp1a2/Cyp3a2/Scd1/Cyp2c11/Cyp2c13/Cyp2c23/Srebf1/Akr1c1/Abcc2/Agxt2/Cyp2d4/Mid1ip1/Insig2/Asrgl1	26
BP	GO:0044281	small molecule metabolic process	39/84	2016/18830	4.33656	1.1e-16	2.23341e-13	Hsd3b5/Gpt2/Acnat2/Apoa4/Igf1/Lipc/Cyp2t1/Cyp2e1/Cyp2w1/Gls2/Fads2/Cyp39a1/RGD1564865/Angptl3/Urad/Cyp3a9/Ttr/Pah/Cyp1a2/Cyp3a2/Scd1/Cyp2c11/Uox/Gnmt/Sult1a1/Cyp2c13/Cyp2c23/Ste/Ste2/Srebf1/Akr1c1/Abcc2/Agxt2/Cyp2d4/Ttc36/Ppp1r3b/Mid1ip1/Insig2/Asrgl1	39
BP	GO:0034754	cellular hormone metabolic process	14/84	146/18830	21.4954	3e-15	5.41433e-12	Hsd3b5/Cyp2w1/RGD1564865/Cyp3a9/Ttr/Cyp1a2/Cyp3a2/Cyp2c11/Sult1a1/Ste/Ste2/Akr1c1/Hsd17b2/Cyp2d4	14
BP	GO:0008210	estrogen metabolic process	9/84	36/18830	56.0417	3.8e-14	6.17234e-11	Cyp3a9/Cyp1a2/Cyp3a2/Cyp2c11/Sult1a1/Ste/Ste2/Hsd17b2/Cyp2d4	9
BP	GO:0071466	cellular response to xenobiotic stimulus	17/84	320/18830	11.9089	4.9e-14	7.23552e-11	Igf1/Cyp2t1/Cyp2e1/Cyp2w1/Aox1/Cyp3a9/Cyp1a2/Cyp3a1/Cyp3a2/Cyp2c11/Sult1a1/Cyp2c13/Cyp2c23/Aox3/Abcc2/Cyp2d4/Fmo3	17
BP	GO:0006631	fatty acid metabolic process	18/84	430/18830	9.38372	4.8e-13	6.4972e-10	Acnat2/Apoa4/Lipc/Cyp2t1/Cyp2e1/Fads2/RGD1564865/Angptl3/Cyp1a2/Scd1/Cyp2c11/Cyp2c13/Cyp2c23/Srebf1/Akr1c1/Cyp2d4/Mid1ip1/Insig2	18
BP	GO:0042445	hormone metabolic process	15/84	267/18830	12.5936	7.9e-13	9.62978e-10	Hsd3b5/Igf1/Cyp2w1/RGD1564865/Cyp3a9/Ttr/Cyp1a2/Cyp3a2/Cyp2c11/Sult1a1/Ste/Ste2/Akr1c1/Hsd17b2/Cyp2d4	15
BP	GO:0070989	oxidative demethylation	7/84	18/18830	87.1759	8.3e-13	9.62978e-10	Cyp3a9/Cyp1a2/Cyp3a1/Cyp3a2/Cyp2c11/Cyp3a18/Cyp2d4	7
BP	GO:0009410	response to xenobiotic stimulus	23/84	875/18830	5.89238	2.8e-12	3.03203e-09	RT1-Db1/Igf1/Lipc/Cyp2t1/Cyp2e1/Cyp2w1/Aox1/Adipor2/Cyp3a9/Cyp1a2/Cyp3a1/Cyp3a2/Cyp2c11/Sult1a1/Cyp2c13/Cyp2c23/Srebf1/Akr1c1/Aox3/Abcc2/Cyp2d4/Fmo3/Slco1b2	23
BP	GO:0016098	monoterpenoid metabolic process	5/84	6/18830	186.806	9.4e-12	9.54276e-09	Cyp2e1/Cyp1a2/Cyp3a2/Cyp2c11/Cyp2d4	5
BP	GO:0010817	regulation of hormone levels	19/84	635/18830	6.70735	3.5e-11	3.34415e-08	Hsd3b5/RT1-Db1/Igf1/Cyp2w1/RGD1564865/Cyp3a9/Ttr/Cyp1a2/Cyp3a2/Cyp2c11/Sult1a1/Ste/Ste2/Srebf1/Akr1c1/Hsd17b2/Slc22a1/Abcc2/Cyp2d4	19
BP	GO:0033559	unsaturated fatty acid metabolic process	11/84	144/18830	17.1238	4.1e-11	3.69979e-08	Cyp2t1/Cyp2e1/Fads2/RGD1564865/Cyp1a2/Scd1/Cyp2c11/Cyp2c13/Cyp2c23/Akr1c1/Cyp2d4	11
BP	GO:0006066	alcohol metabolic process	15/84	363/18830	9.26309	6.3e-11	5.38584e-08	Apoa4/Lipc/Cyp39a1/RGD1564865/Angptl3/Ttr/Cyp1a2/Cyp3a2/Sult1a1/Ste/Ste2/Srebf1/Akr1c1/Cyp2d4/Insig2	15
BP	GO:0044255	cellular lipid metabolic process	23/84	1059/18830	4.86859	1.3e-10	1.05579e-07	Acnat2/Apoa4/Lipc/Cyp2t1/Cyp2e1/Cyp2w1/Fads2/RGD1564865/Angptl3/Cyp3a9/Ttr/Thrsp/Cyp1a2/Cyp3a2/Scd1/Cyp2c11/Cyp2c13/Cyp2c23/Srebf1/Akr1c1/Cyp2d4/Mid1ip1/Insig2	23
BP	GO:0006721	terpenoid metabolic process	9/84	97/18830	20.799	4.7e-10	3.63534e-07	Cyp2e1/Cyp2w1/RGD1564865/Cyp3a9/Ttr/Cyp1a2/Cyp3a2/Cyp2c11/Cyp2d4	9
BP	GO:0044283	small molecule biosynthetic process	19/84	758/18830	5.61895	7e-10	5.16823e-07	Gpt2/Apoa4/Igf1/Lipc/Gls2/Fads2/Cyp39a1/Urad/Pah/Cyp3a2/Scd1/Cyp2c11/Uox/Gnmt/Cyp2c23/Srebf1/Agxt2/Mid1ip1/Insig2	19
BP	GO:0034308	primary alcohol metabolic process	9/84	102/18830	19.7794	7.4e-10	5.22601e-07	RGD1564865/Ttr/Cyp1a2/Cyp3a2/Sult1a1/Ste/Ste2/Akr1c1/Cyp2d4	9
BP	GO:1901615	organic hydroxy compound metabolic process	16/84	549/18830	6.53309	2.2e-09	1.48894e-06	Apoa4/Lipc/Cyp2e1/Cyp39a1/RGD1564865/Angptl3/Ttr/Cyp1a2/Cyp3a2/Sult1a1/Ste/Ste2/Srebf1/Akr1c1/Cyp2d4/Insig2	16
BP	GO:0042178	xenobiotic catabolic process	6/84	29/18830	46.3793	2.9e-09	1.88419e-06	Cyp3a9/Cyp1a2/Cyp3a2/Cyp2c11/Abcc2/Cyp2d4	6
BP	GO:0006720	isoprenoid metabolic process	9/84	122/18830	16.5369	3.7e-09	2.3115e-06	Cyp2e1/Cyp2w1/RGD1564865/Cyp3a9/Ttr/Cyp1a2/Cyp3a2/Cyp2c11/Cyp2d4	9
BP	GO:0006690	icosanoid metabolic process	9/84	147/18830	13.7245	1.9e-08	1.1022e-05	Cyp2t1/Cyp2e1/RGD1564865/Cyp1a2/Cyp2c11/Cyp2c13/Cyp2c23/Akr1c1/Cyp2d4	9
BP	GO:0019369	arachidonic acid metabolic process	7/84	71/18830	22.1009	2.9e-08	1.6243e-05	Cyp2t1/Cyp2e1/Cyp1a2/Cyp2c11/Cyp2c13/Cyp2c23/Cyp2d4	7
BP	GO:0070988	demethylation	7/84	74/18830	21.205	3.9e-08	2.11159e-05	Cyp3a9/Cyp1a2/Cyp3a1/Cyp3a2/Cyp2c11/Cyp3a18/Cyp2d4	7
BP	GO:0001523	retinoid metabolic process	7/84	77/18830	20.3788	5.1e-08	2.67224e-05	Cyp2w1/RGD1564865/Cyp3a9/Ttr/Cyp1a2/Cyp3a2/Cyp2d4	7
BP	GO:0046394	carboxylic acid biosynthetic process	13/84	429/18830	6.79293	5.4e-08	2.74101e-05	Apoa4/Igf1/Lipc/Gls2/Fads2/Cyp39a1/Pah/Scd1/Cyp2c11/Cyp2c23/Agxt2/Mid1ip1/Insig2	13
BP	GO:0016053	organic acid biosynthetic process	13/84	431/18830	6.76141	5.7e-08	2.80561e-05	Apoa4/Igf1/Lipc/Gls2/Fads2/Cyp39a1/Pah/Scd1/Cyp2c11/Cyp2c23/Agxt2/Mid1ip1/Insig2	13
BP	GO:0017144	drug metabolic process	17/84	804/18830	4.73984	7.7e-08	3.67856e-05	Hsd3b5/Apoa4/Igf1/RGD1564865/Urad/Pah/Cyp1a2/Cyp3a2/Uox/Gnmt/Sult1a1/Ste/Ste2/Akr1c1/Abcc2/Agxt2/Cyp2d4	17
BP	GO:0016101	diterpenoid metabolic process	7/84	86/18830	18.2461	1.1e-07	4.829e-05	Cyp2w1/RGD1564865/Cyp3a9/Ttr/Cyp1a2/Cyp3a2/Cyp2d4	7
BP	GO:1901568	fatty acid derivative metabolic process	9/84	181/18830	11.1464	1.1e-07	4.829e-05	Cyp2t1/Cyp2e1/RGD1564865/Cyp1a2/Cyp2c11/Cyp2c13/Cyp2c23/Akr1c1/Cyp2d4	9
BP	GO:0044282	small molecule catabolic process	12/84	384/18830	7.00521	1.3e-07	5.55682e-05	Cyp2w1/Gls2/Cyp39a1/Urad/Pah/Cyp3a2/Uox/Sult1a1/Ste/Ste2/Agxt2/Asrgl1	12
BP	GO:0006706	steroid catabolic process	5/84	30/18830	37.3611	2e-07	8.32974e-05	Cyp39a1/Cyp1a2/Cyp3a2/Ste/Ste2	5
BP	GO:0019373	epoxygenase P450 pathway	5/84	31/18830	36.1559	2.4e-07	9.7458e-05	Cyp2t1/Cyp2e1/Cyp2c11/Cyp2c13/Cyp2c23	5
BP	GO:1902652	secondary alcohol metabolic process	8/84	149/18830	12.0358	3.3e-07	0.000130736	Apoa4/Lipc/Cyp39a1/Angptl3/Cyp1a2/Cyp3a2/Srebf1/Insig2	8
BP	GO:0016999	antibiotic metabolic process	8/84	157/18830	11.4225	5e-07	0.000193369	Apoa4/RGD1564865/Cyp1a2/Sult1a1/Ste/Ste2/Akr1c1/Abcc2	8
BP	GO:0006641	triglyceride metabolic process	7/84	111/18830	14.1366	6.4e-07	0.000241756	Apoa4/Lipc/Cyp2e1/Thrsp/Scd1/Srebf1/Insig2	7
BP	GO:0006694	steroid biosynthetic process	8/84	169/18830	10.6114	8.7e-07	0.000314031	Hsd3b5/Apoa4/Igf1/Cyp39a1/Cyp3a2/Srebf1/Hsd17b2/Insig2	8
BP	GO:0042737	drug catabolic process	7/84	117/18830	13.4117	9.1e-07	0.000321329	Apoa4/Urad/Pah/Uox/Sult1a1/Ste/Ste2	7
BP	GO:0019748	secondary metabolic process	6/84	75/18830	17.9333	1e-06	0.000345596	Cyp2w1/RGD1564865/Cyp1a2/Akr1c1/Abcc2/Cyp2d4	6
BP	GO:0001676	long-chain fatty acid metabolic process	7/84	124/18830	12.6546	1.3e-06	0.000439915	Cyp2t1/Cyp2e1/Cyp1a2/Cyp2c11/Cyp2c13/Cyp2c23/Cyp2d4	7
BP	GO:0006639	acylglycerol metabolic process	7/84	139/18830	11.289	2.9e-06	0.00096132	Apoa4/Lipc/Cyp2e1/Thrsp/Scd1/Srebf1/Insig2	7
BP	GO:0008203	cholesterol metabolic process	7/84	140/18830	11.2083	3e-06	0.00097458	Apoa4/Lipc/Cyp39a1/Angptl3/Cyp1a2/Srebf1/Insig2	7
BP	GO:0006638	neutral lipid metabolic process	7/84	141/18830	11.1288	3.2e-06	0.00101917	Apoa4/Lipc/Cyp2e1/Thrsp/Scd1/Srebf1/Insig2	7
BP	GO:0033993	response to lipid	19/84	1298/18830	3.28133	3.3e-06	0.00103081	Hsd3b5/Gpt2/Apoa4/RT1-Db1/Igf1/Lipc/Adipor2/Cyp3a9/Cyp1a2/Cyp3a1/Scd1/Sult1a1/Cyp2c23/Srebf1/Hsd17b2/Abcc2/Insig2/Ppbp/Slco1b2	19
BP	GO:0008610	lipid biosynthetic process	13/84	623/18830	4.67764	3.6e-06	0.0011033	Hsd3b5/Apoa4/Igf1/Lipc/Fads2/Cyp39a1/Thrsp/Cyp3a2/Scd1/Srebf1/Hsd17b2/Mid1ip1/Insig2	13
BP	GO:0016125	sterol metabolic process	7/84	148/18830	10.6025	4.4e-06	0.0013235	Apoa4/Lipc/Cyp39a1/Angptl3/Cyp1a2/Srebf1/Insig2	7
BP	GO:1901605	alpha-amino acid metabolic process	8/84	214/18830	8.38006	5.1e-06	0.00150617	Gpt2/Gls2/Pah/Gnmt/Agxt2/Cyp2d4/Ttc36/Asrgl1	8
BP	GO:0009725	response to hormone	19/84	1340/18830	3.17848	5.3e-06	0.00153728	Hsd3b5/Gpt2/RT1-Db1/Igf1/Lipc/Slc2a2/RGD1564865/Angptl3/Adipor2/Cyp3a9/Cyp1a2/Cyp3a1/Sult1a1/Cyp2c23/Srebf1/Akr1c1/Abcc2/Insig2/Slco1b2	19
BP	GO:0055114	oxidation-reduction process	11/84	461/18830	5.34888	6.2e-06	0.00176678	Igf1/Cyp3a9/Pah/Cyp1a2/Cyp3a1/Cyp3a2/Cyp2c11/Gnmt/Cyp3a18/Cyp2d4/Ppp1r3b	11
BP	GO:0051384	response to glucocorticoid	9/84	299/18830	6.74749	7.4e-06	0.00207238	Hsd3b5/RT1-Db1/Igf1/Lipc/Cyp3a9/Cyp3a1/Sult1a1/Abcc2/Slco1b2	9
BP	GO:0031960	response to corticosteroid	9/84	327/18830	6.16972	1.5e-05	0.00399418	Hsd3b5/RT1-Db1/Igf1/Lipc/Cyp3a9/Cyp3a1/Sult1a1/Abcc2/Slco1b2	9
BP	GO:0016042	lipid catabolic process	9/84	333/18830	6.05856	1.7e-05	0.00445373	Apoa4/Lipc/Cyp2w1/Cyp39a1/Angptl3/Cyp1a2/Cyp3a2/Ste/Ste2	9
BP	GO:0046890	regulation of lipid biosynthetic process	7/84	193/18830	8.1304	2.5e-05	0.00624731	Hsd3b5/Apoa4/Igf1/Thrsp/Srebf1/Mid1ip1/Insig2	7
BP	GO:1901616	organic hydroxy compound catabolic process	5/84	82/18830	13.6687	3.3e-05	0.00788263	Cyp39a1/Cyp3a2/Sult1a1/Ste/Ste2	5
BP	GO:1901654	response to ketone	9/84	366/18830	5.5123	3.7e-05	0.00871001	Hsd3b5/Gpt2/RT1-Db1/Igf1/Cyp3a9/Cyp3a1/Cyp2c23/Srebf1/Abcc2	9
BP	GO:1901700	response to oxygen-containing compound	23/84	2154/18830	2.39361	4.7e-05	0.0107524	Hsd3b5/Slc2a5/Gpt2/Apoa4/RT1-Db1/Igf1/Lipc/Slc2a2/Cyp2e1/RGD1564865/Adipor2/Cyp3a9/Cyp1a2/Cyp3a1/Scd1/Cyp2c23/Srebf1/Akr1c1/Hsd17b2/Abcc2/Insig2/Ppbp/Slco1b2	23
BP	GO:0009056	catabolic process	25/84	2485/18830	2.2552	5.4e-05	0.0121823	Apoa4/Igf1/Lipc/Cyp2w1/Gls2/Lyplal1/Cyp39a1/Angptl3/Urad/Cyp3a9/Pah/Cyp1a2/Cyp3a2/Cyp2c11/Uox/Sult1a1/Ste/Ste2/Srebf1/Abcc2/Agxt2/Cyp2d4/Ttc36/Ppp1r3b/Asrgl1	25
BP	GO:0006520	cellular amino acid metabolic process	8/84	299/18830	5.99777	5.6e-05	0.0124604	Gpt2/Gls2/Pah/Gnmt/Agxt2/Cyp2d4/Ttc36/Asrgl1	8
BP	GO:0042180	cellular ketone metabolic process	7/84	220/18830	7.13258	5.7e-05	0.0125115	Hsd3b5/Apoa4/RGD1564865/Srebf1/Akr1c1/Mid1ip1/Insig2	7
BP	GO:0006633	fatty acid biosynthetic process	6/84	155/18830	8.67742	6.8e-05	0.0139813	Apoa4/Lipc/Fads2/Scd1/Mid1ip1/Insig2	6
BP	GO:0044248	cellular catabolic process	23/84	2233/18830	2.30893	8.3e-05	0.0166441	Apoa4/Igf1/Lipc/Cyp2w1/Gls2/Angptl3/Urad/Cyp3a9/Pah/Cyp1a2/Cyp3a2/Cyp2c11/Uox/Sult1a1/Ste/Ste2/Srebf1/Abcc2/Agxt2/Cyp2d4/Ttc36/Ppp1r3b/Asrgl1	23
BP	GO:1901575	organic substance catabolic process	22/84	2079/18830	2.37213	8.3e-05	0.0166441	Apoa4/Igf1/Lipc/Cyp2w1/Gls2/Lyplal1/Cyp39a1/Angptl3/Urad/Cyp3a9/Pah/Cyp1a2/Cyp3a2/Uox/Sult1a1/Ste/Ste2/Agxt2/Cyp2d4/Ttc36/Ppp1r3b/Asrgl1	22
BP	GO:0072330	monocarboxylic acid biosynthetic process	8/84	318/18830	5.63941	8.7e-05	0.0170258	Apoa4/Igf1/Lipc/Fads2/Cyp39a1/Scd1/Mid1ip1/Insig2	8
BP	GO:0070887	cellular response to chemical stimulus	29/84	3240/18830	2.00643	9.5e-05	0.0181539	Slc2a5/Gpt2/Apoa4/RT1-Db1/Igf1/Lipc/Cyp2t1/Cyp2e1/Cyp2w1/Aox1/RGD1564865/Adipor2/Cyp3a9/Cyp1a2/Cyp3a1/Cyp3a2/Cyp2c11/Sult1a1/Cyp2c13/Cyp2c23/Srebf1/Akr1c1/Hsd17b2/Aox3/Abcc2/Cyp2d4/Insig2/Ppbp/Fmo3	29
BP	GO:0008152	metabolic process	68/84	11577/18830	1.31669	9.7e-05	0.0182967	Hsd3b5/Ndrg2/Gpt2/Acnat2/Apoa4/RT1-Db1/Igf1/Lipc/Cyp2t1/F11/Sult1c3/Cyp2e1/Cyp2w1/Apcs/Gls2/Fads2/Creg1/Fads6/Lyplal1/Alpk3/Aamdc/Colec10/Cyp39a1/Serpina3m/Aox1/RGD1564865/Angptl3/Adipor2/Mug2/Ccdc36/Ptprd/Urad/Cyp3a9/Celsr3/Ttr/Thrsp/Pah/Cyp1a2/Cyp3a1/Cyp3a2/Serpina3k/Scd1/Mbl2/Cyp2c11/Uox/Gnmt/Sult1a1/Cyp2c13/Cyp2c23/Ste/Ste2/Srebf1/Akr1c1/Mettl7b/Hsd17b2/Aox3/Abcc2/Agxt2/Cyp3a18/Cyp2d4/Ttc36/P…	68
BP	GO:0048545	response to steroid hormone	10/84	516/18830	4.34432	9.8e-05	0.0182967	Hsd3b5/RT1-Db1/Igf1/Lipc/Cyp3a9/Cyp3a1/Sult1a1/Srebf1/Abcc2/Slco1b2	10
BP	GO:0071548	response to dexamethasone	5/84	106/18830	10.5739	0.00011	0.0196885	RT1-Db1/Igf1/Cyp3a9/Cyp3a1/Abcc2	5
BP	GO:0019218	regulation of steroid metabolic process	5/84	112/18830	10.0074	0.00014	0.022515	Hsd3b5/Apoa4/Igf1/Srebf1/Insig2	5
BP	GO:0065008	regulation of biological quality	34/84	4234/18830	1.80011	0.00016	0.0249892	Hsd3b5/Slc2a5/Apoa4/RT1-Db1/Igf1/Lipc/F11/Cyp2w1/Cyp39a1/Slc28a2/RGD1564865/Angptl3/Adipor2/Ptprd/Cyp3a9/Ttr/Cyp1a2/Cyp3a2/Scd1/Cyp2c11/Gnmt/Sult1a1/Ste/Ste2/Srebf1/Slc39a13/Akr1c1/Hsd17b2/Slc22a1/Abcc2/Agxt2/Cyp2d4/Insig2/Ppbp	34
BP	GO:0045444	fat cell differentiation	7/84	263/18830	5.96641	0.00017	0.0262982	Igf1/Aamdc/Scd1/Ste/Ste2/Srebf1/Selenbp1	7
BP	GO:0070542	response to fatty acid	5/84	132/18830	8.49116	0.00031	0.0419611	Lipc/Adipor2/Scd1/Srebf1/Insig2	5
BP	GO:0007565	female pregnancy	7/84	291/18830	5.39233	0.00032	0.0429567	Igf1/Adipor2/Cyp3a9/Ste/Ste2/Abcc2/Cyp2d4	7
BP	GO:0019216	regulation of lipid metabolic process	8/84	391/18830	4.58653	0.00035	0.0465988	Hsd3b5/Apoa4/Igf1/Angptl3/Thrsp/Srebf1/Mid1ip1/Insig2	8
