# Supplementary material for: Liver proteomic analysis reveals the key proteins involved in host immune response to sepsis
Source: PeerJ. 2023 May 26;11:e15294. doi: 10.7717/peerj.15294 (PMC10226476; doi:10.7717/peerj.15294)
Supplement: Supplemental Information 4 [file peerj-11-15294-s004.xlsx]

## Sheet: Sheet1
Table S4: Comparision of targeted protein expression according to TMT and PRM approaches
GeneName	Accession	TMT_treatment vs.control FC	TMT_treatment vs.control log2FC	TMT P-value	PRM_treatment vs.control FC	PRM_treatment vs.control log2FC	PRM P-value	Consistency of TMT and PRM
Fads2	Q9Z122	0.451725	-1.14648	0.00802096	0.158853	-2.65424	0.0160679	YES
Fgb	P14480	2.42415	1.27748	8.28071e-05	2.916	1.54399	0.000428706	YES
Cyp1a2	P04799	0.445157	-1.16761	0.000384854	0.432183	-1.21028	0.0260686	YES
Cyp2e1	P05182	0.463165	-1.1104	0.00352112	0.414971	-1.26892	0.0334705	YES
Cfb	G3V615	2.44516	1.28993	3.92511e-05	3.2846	1.71572	0.0118452	YES
Serping1	Q6P734	2.2324	1.1586	6.24291e-05	2.44671	1.29084	0.00615327	YES
Fgg	P02680	3.89444	1.96142	5.80437e-05	8.75991	3.13092	0.141521	YES
Etnppl	M0R7F6	0.463226	-1.11021	0.0364349	0.356095	-1.48967	0.0420336	YES
Agt	P01015	2.17907	1.12371	0.000797337	1.84707	0.885241	0.084241	YES
Hsd3b5	P27364	0.438646	-1.18887	0.00123385	0.384767	-1.37794	0.00920599	YES
Gnmt	P13255	0.42492	-1.23474	0.000532095	0.633534	-0.658507	0.174445	YES
A2m	P06238	5.06942	2.34182	6.05418e-05	13.9477	3.80196	0.1135	YES
Pck1	P07379	2.55285	1.35211	0.000215588	8.45549	3.07989	0.000996404	YES
Stat3	P52631	2.67412	1.41906	0.0186103	2.41865	1.2742	0.0353575	YES
Ptpn1	P20417	2.39765	1.26162	0.000100285	2.06346	1.04507	0.0644973	YES
Scd1	P07308	0.198888	-2.32997	0.000128678	0.660093	-0.59926	0.430461	YES
Slc2a1	P11167	2.12132	1.08496	0.047818	1.52449	0.60833	0.292659	YES
Uox	P09118	0.434374	-1.20299	0.0328773	0.161945	-2.62642	0.0758823	YES
